# Supplementary material for: No replicable morphometry variations and limited morphometry-phenotype associations for cortical neuroimaging in irritable bowel syndrome
Source: Research Square preprint supplement (doi:10.21203/rs.3.rs-8232200/v1), 2025-12-08
Supplement: Supplementary file 1 [file 5c0480d0e32d56ac9378fa34.docx]

**Supplementary checklist**

Guidelines for Reporting Analyses of Big Data Repositories Open to the Public (GRABDROP)

1. Please list all papers published by each co-author in previous three years that were based on secondary analysis of a big data repository.

- H.G.: None
- C.V.S.:
  1. Chen, Y. *et al.* Deep Learning Reveals Liver MRI Features Associated With PNPLA3 I148M in Steatotic Liver Disease. *Liver International* **45**, e70164 (2025).
  2. Krishnan, A., Schneider, C. V., Mukherjee, D., Woreta, T. A. & Alqahtani, S. A. Adverse Liver and Renal Outcomes After Initiating SGLT-2i and GLP-1RA Therapy Among Patients With Diabetes and MASLD. *Journal of Diabetes* **17**, e70069 (2025).
  3. Volkert, I. *et al.* Selective genetic inactivation of Caspase 8 in hepatocytes ameliorates progression of MASH following Jnk deficiency. *Hepatology* 10.1097/HEP.0000000000001286 doi:[10.1097/HEP.0000000000001286](https://doi.org/10.1097/HEP.0000000000001286).
  4. Schneider, K. M. *et al.* The Lipidomic Profile Discriminates Between MASLD and MetALD. *Alimentary Pharmacology & Therapeutics* **61**, 1357–1371 (2025).
  5. Krishnan, A., Schneider, C. V. & Walsh, D. Proton pump inhibitors and all-cause mortality risk among cancer patients. *World Journal of Clinical Oncology* **16**, (2025).
  6. Huang, H. Y. R. *et al.* Deep metabolic phenotyping of humans with protein-altering variants in *TM6SF2* using a genome-first approach. *JHEP Reports* **7**, 101243 (2025).
  7. Krishnan, A. *et al.* Association between incretin-based drugs and risk of cholangiocarcinoma among patients with type 2 diabetes: A large population-based matched cohort study. *Journal of Clinical & Translational Endocrinology* **38**, 100370 (2024).
  8. Rendel, M. D. *et al.* The common p.Ile291Val variant of *ERLIN1* enhances TM6SF2 function and is associated with protection against MASLD. *Med* **5**, 963-980.e5 (2024).
  9. Schophaus, S. *et al.* Machine learning uncovers manganese as a key nutrient associated with reduced risk of steatotic liver disease. *Liver International* **44**, 2807–2821 (2024).
  10. Fromme, M. *et al.* Alcohol consumption and liver phenotype of individuals with alpha-1 antitrypsin deficiency. *Liver International* **44**, 2660–2671 (2024).
  11. Hehl, L. *et al.* A genome-first approach to variants in MLXIPL and their association with hepatic steatosis and plasma lipids. *Hepatology Communications* **8**, e0427 (2024).
  12. Koop, P.-H. *et al.* Comorbidities, mortality and metabolic profile in individuals with primary biliary cholangitis—A Phenome-Wide-Association-Study. *Liver International* **44**, 2038–2053 (2024).
  13. Schneider, C. V. *et al.* Prevalence of at-risk MASH, MetALD and alcohol-associated steatotic liver disease in the general population. *Alimentary Pharmacology & Therapeutics* **59**, 1271–1281 (2024).
  14. Fromme, M. *et al.* Alpha-1 Antitrypsin Augmentation and the Liver Phenotype of Adults With Alpha-1 Antitrypsin Deficiency (Genotype Pi∗ZZ). *Clinical Gastroenterology and Hepatology* **22**, 283-294.e5 (2024).
  15. Song, I. *et al.* Clinical correlates of CT imaging-derived phenotypes among lean and overweight patients with hepatic steatosis. *Sci Rep* **14**, 53 (2024).
  16. Krishnan, A. *et al.* Cardiovascular and mortality outcomes with GLP-1 receptor agonists vs other glucose-lowering drugs in individuals with NAFLD and type 2 diabetes: a large population-based matched cohort study. *Diabetologia* **67**, 483–493 (2024).
  17. Saberi, B. *et al.* Racial Disparities in Candidates for Hepatocellular Carcinoma Liver Transplant After 6-Month Wait Policy Change. *JAMA Netw Open* **6**, e2341096 (2023).
  18. Vell, M. S. *et al.* Aspirin is associated with a reduced incidence of liver disease in men. *Hepatology Communications* **7**, e0268 (2023).
  19. Wizenty, J. *et al.* Association of Helicobacter pylori Positivity With Risk of Disease and Mortality. *Clinical and Translational Gastroenterology* **14**, e00610 (2023).
  20. Volkert, I. *et al.* Impact of PNPLA3 I148M on alpha-1 antitrypsin deficiency-dependent liver disease progression. *Hepatology* **79**, 898 (2024).
  21. Schneider, C. V. *et al.* Large-scale identification of undiagnosed hepatic steatosis using natural language processing. *eClinicalMedicine* **62**, 102149 (2023).
  22. Vell, M. S. *et al.* Omega-3 intake is associated with liver disease protection. *Front. Public Health* **11**, (2023).
  23. Vell, M. S. *et al.* Association of Statin Use With Risk of Liver Disease, Hepatocellular Carcinoma, and Liver-Related Mortality. *JAMA Netw Open* **6**, e2320222 (2023).
  24. Schneider, C. V. *et al.* A coding variant in the microsomal triglyceride transfer protein reduces both hepatic steatosis and plasma lipids. *Alimentary Pharmacology & Therapeutics* **58**, 238–249 (2023).
  25. Seeling, K. S. *et al.* Comorbidities, biomarkers and cause specific mortality in patients with irritable bowel syndrome: A phenome-wide association study. *United European Gastroenterology Journal* **11**, 458–470 (2023).
- T.S.:
  1. Chen, Y. *et al.* Deep Learning Reveals Liver MRI Features Associated With PNPLA3 I148M in Steatotic Liver Disease. *Liver International* **45**, e70164 (2025).
  2. Loeffler, C. M. L. *et al.* Prediction of homologous recombination deficiency from routine histology with attention-based multiple instance learning in nine different tumor types. *BMC Biology* **22**, 225 (2024).
  3. Loeffler, C. M. L. *et al.* Direct prediction of Homologous Recombination Deficiency from routine histology in ten different tumor types with attention-based Multiple Instance Learning: a development and validation study. 2023.03.08.23286975 Preprint at <https://doi.org/10.1101/2023.03.08.23286975> (2023).
- C.Z.: None
- F.C.:
  1. Zhang, Y. *et al.* Atypical brain function hierarchy in autism spectrum disorder: insights from a novel analytical approach based on neuronal oscillation pattern. *Eur Child Adolesc Psychiatry* (2025) doi:[10.1007/s00787-025-02716-7](https://doi.org/10.1007/s00787-025-02716-7).
  2. Zhang, Y. *et al.* Age-related unstable transient states and imbalanced activation proportion of brain networks in people with autism spectrum disorder: A resting-state fMRI study using coactivation pattern analyses. *Network Neuroscience* **8**, 1173–1191 (2024).
  3. Zhang, Y. *et al.* Atypical transient network states of autism spectrum disorder: resting-state fMRI study using co-activation pattern.
- K.M.:
  1. Maxion, A. *et al.* Spectral changes in electroencephalography linked to neuroactive medications: A computational pipeline for data mining and analysis. *Computer Methods and Programs in Biomedicine* **255**, 108319 (2024).
- K.M.S.:
  1. Chen, Y. *et al.* Deep Learning Reveals Liver MRI Features Associated With PNPLA3 I148M in Steatotic Liver Disease. *Liver International* **45**, e70164 (2025).
  2. Volkert, I. *et al.* Selective genetic inactivation of Caspase 8 in hepatocytes ameliorates progression of MASH following Jnk deficiency. *Hepatology* 10.1097/HEP.0000000000001286 doi:[10.1097/HEP.0000000000001286](https://doi.org/10.1097/HEP.0000000000001286).
  3. Schneider, K. M. *et al.* The Lipidomic Profile Discriminates Between MASLD and MetALD. *Alimentary Pharmacology & Therapeutics* **61**, 1357–1371 (2025).
  4. Huang, H. Y. R. *et al.* Deep metabolic phenotyping of humans with protein-altering variants in *TM6SF2* using a genome-first approach. *JHEP Reports* **7**, 101243 (2025).
  5. Rendel, M. D. *et al.* The common p.Ile291Val variant of *ERLIN1* enhances TM6SF2 function and is associated with protection against MASLD. *Med* **5**, 963-980.e5 (2024).
  6. Schophaus, S. *et al.* Machine learning uncovers manganese as a key nutrient associated with reduced risk of steatotic liver disease. *Liver International* **44**, 2807–2821 (2024).
  7. Fromme, M. *et al.* Alcohol consumption and liver phenotype of individuals with alpha-1 antitrypsin deficiency. *Liver International* **44**, 2660–2671 (2024).
  8. Hehl, L. *et al.* A genome-first approach to variants in MLXIPL and their association with hepatic steatosis and plasma lipids. *Hepatology Communications* **8**, e0427 (2024).
  9. Koop, P.-H. *et al.* Comorbidities, mortality and metabolic profile in individuals with primary biliary cholangitis—A Phenome-Wide-Association-Study. *Liver International* **44**, 2038–2053 (2024).
  10. Schneider, C. V. *et al.* Prevalence of at-risk MASH, MetALD and alcohol-associated steatotic liver disease in the general population. *Alimentary Pharmacology & Therapeutics* **59**, 1271–1281 (2024).
  11. Vell, M. S. *et al.* Aspirin is associated with a reduced incidence of liver disease in men. *Hepatology Communications* **7**, e0268 (2023).
  12. Wizenty, J. *et al.* Association of Helicobacter pylori Positivity With Risk of Disease and Mortality. *Clinical and Translational Gastroenterology* **14**, e00610 (2023).
  13. Volkert, I. *et al.* Impact of PNPLA3 I148M on alpha-1 antitrypsin deficiency-dependent liver disease progression. *Hepatology* **79**, 898 (2024).
  14. Schneider, C. V. *et al.* Large-scale identification of undiagnosed hepatic steatosis using natural language processing. *eClinicalMedicine* **62**, 102149 (2023).
  15. Vell, M. S. *et al.* Omega-3 intake is associated with liver disease protection. *Front. Public Health* **11**, (2023).
  16. Vell, M. S. *et al.* Association of Statin Use With Risk of Liver Disease, Hepatocellular Carcinoma, and Liver-Related Mortality. *JAMA Netw Open* **6**, e2320222 (2023).
  17. Schneider, C. V. *et al.* A coding variant in the microsomal triglyceride transfer protein reduces both hepatic steatosis and plasma lipids. *Alimentary Pharmacology & Therapeutics* **58**, 238–249 (2023).
  18. Seeling, K. S. *et al.* Comorbidities, biomarkers and cause specific mortality in patients with irritable bowel syndrome: A phenome-wide association study. *United European Gastroenterology Journal* **11**, 458–470 (2023).
  19. Duan, Y. *et al.* SLC1A5-dependent glutamine uptake in hepatocytes promotes liver regeneration. *Hepatology Communications* **9**, e0742 (2025).
- D.M.A.M.:
  1. Seeling, K. S. *et al.* Comorbidities, biomarkers and cause specific mortality in patients with irritable bowel syndrome: A phenome-wide association study. *United European Gastroenterology Journal* **11**, 458–470 (2023).

1. Please explain the key elements of your study design and the use of the available datasets that make your study an original scientific contribution.

-Previous neuroimaging studies of IBS have reported inconsistent and likely overestimated morphometric alterations, likely due to small samples and heterogeneous diagnostic criteria. To address these issues and replicate earlier findings with robust statistical power, we applied the UK Biobank (UKB), a large-scale biomedical dataset. It not only provides a uniquely large IBS cohort with extensive demographic and clinical information, but also a large healthy cohort drawn from the same population. This enabled us to build normative models based on healthy and then quantify individual-level deviations in brain morphometry among IBS cases. By combining large-scale data with normative modeling, our study reports a robust framework for disentangling associations between IBS and brain morphometric variations.

1. Please list all publications that addressed similar research questions in the same dataset and indicate where you cited them in your paper.

-Li, Z. *et al.* Irritable Bowel Syndrome Is Associated With Brain Health by Neuroimaging, Behavioral, Biochemical, and Genetic Analyses. *Biological Psychiatry* **95**, 1122–1132 (2024).

In this study, they explored how IBS symptoms associated with neuroimaing, behavioral, biochemical, and genetic analyses with all participants from UK Biobank including both healthy and IBS patients. IBS was assessed only with IBS symptom severity score. We cited this paper in our introduction section.

1. Please explain how you addressed multiple testing through an appropriately rigorous statistical threshold and indicate this in the methods section.

-Here, we applied false discovery rate (FDR) correction by using the Benjamini Hochberg method across all statistical testing over multiple brain regions. For each family of tests, only *pFDR* <0.05 were interpreted as significant. Meanwhile, equivalence testing was conducted to determine whether effect size was meaningful for group-level differences.

1. Please declare to what extent have AI chatbots been used in developing your paper and to which parts of the paper did they contribute.

-AI chatbots (ChatGPT) were not involved in research question development, study design, data analysis, interpretation of results, decision making or initial manuscript drafting. They were only for grammar checking and language refinement.
