# Supplementary material for: No replicable morphometry variations and limited morphometry-phenotype associations for cortical neuroimaging in irritable bowel syndrome
Source: Research Square preprint supplement (doi:10.21203/rs.3.rs-8232200/v1), 2025-12-08
Supplement: Supplementary file 1 [file 6338e12a3be18ffa212deb94.pdf]

**Supplementary Information for “No replicable morphometry variations and limited morphometry-phenotype associations for cortical neuroimaging in irritable bowel syndrome”**

Hanbing Gao<sup>1,2</sup>, Carolin V. Schneider<sup>3</sup>, Tobias Seibel<sup>3</sup>, Chi Zhang<sup>2</sup>, Fengyu Cong<sup>2,4,5</sup>, Klaus Mathiak<sup>1,6</sup>, Kai Markus Schneider<sup>3,7,8,9</sup>, David M. A. Mehler<sup>1,10,11\*</sup>

<sup>1</sup> Department for Psychiatry, Psychotherapy and Psychosomatics, Medical School, RWTH Aachen University, Aachen, Germany

<sup>2</sup> School of Biomedical Engineering, Faculty of Medicine, Dalian University of Technology, Dalian, China

<sup>3</sup> Department of Internal Medicine III, Gastroenterology, Metabolic Diseases and Intensive Care, University Hospital RWTH Aachen, Aachen, Germany

<sup>4</sup> Faculty of Information Technology, University of Jyväskylä, Jyväskylä, Finland

<sup>5</sup> Key Laboratory of Social Computing and Cognitive Intelligence, Ministry of Education, Dalian University of Technology, Dalian, China

<sup>6</sup> JARA-Translational Brain Medicine, RWTH Aachen University, Aachen, Germany

<sup>7</sup> Department of Medicine I, Department of Gastroenterology and Hepatology, Faculty of Medicine and University Hospital Carl Gustav Carus, TUD Dresden University of Technology, Dresden, Germany

<sup>8</sup> Center for Regenerative Therapies Dresden (CRTD), Technische Universität (TU) Dresden, Dresden, Germany

<sup>9</sup> Else Kroener Fresenius Center for Digital Health, Faculty of Medicine and University Hospital Carl Gustav Carus, TUD Dresden University of Technology, Dresden, Germany

<sup>10</sup> Institute of Translational Psychiatry, Medical Faculty, University of Münster, Münster, Germany

<sup>11</sup> School of Psychology, Cardiff University Brain Research Imaging Center (CUBRIC), Cardiff University, Cardiff, U.K.

\* Correspondence: David M. A. Mehler, Universitätsklinikum Aachen, AöR, Pauwelsstraße 30, 52074 Aachen; Tel.: +49241 80-88199; E-Mail: [dmehler@ukaachen.de](mailto:dmehler@ukaachen.de)

**Contents:**

Supplementary Table 1\*. The exclusion criteria applied to define the healthy reference and healthy control groups.

Supplementary Table 2. Exclusion criteria applied to IBS cases

Supplementary Table 3. Definition of IBS

Supplementary Table 4\*. Clinical questionnaires applied in this study in UK Biobank.

Supplementary Table 5. Regions of interest related to IBS

Supplementary Table 6\*. Evaluation metrics for normative models.

Supplementary Table 7\*. Parameter estimates for fixed effects of group

Supplementary Table 8\*. Equivalence test for fixed effects of group

Supplementary Table 9\*. Parameter estimates for fixed effects of group  $\times$  sex

Supplementary Table 10\*. Equivalence test for fixed effects of group  $\times$  sex

Supplementary Table 11\*. Within-group cortical brain-phenotype association and association differences

Supplementary Table 12\*. Difference-in-differences group  $\times$  sex  $\times$  scale interaction effects with equivalence test

Supplementary Figure 1. Distributions of evaluation metrics for normative models

Supplementary Figure 2. Within IBS cortical brain-phenotype associations

Supplementary Figure 3. Forest plots of cortical brain-phenotype association differences between IBS and HCs

Supplementary Figure 4. Forest plots of difference-in-differences effect sizes for group  $\times$  sex interaction effect

\* Supplementary Table 1,4, 6-12 are presented in Supplementary Excel.

Supplementary Table 2. **The exclusion criteria applied to IBS cases.** Excluded conditions included inflammatory bowel disease, GI malignancy, malabsorption, celiac or gluten sensitivity based on blood test or endoscopy, and several abdominal surgeries.

| Criteria                              | Prompt                                                 | Positive answer                                                                                                                                                                                                                                                                                                                                                                                                                                                                                                                                                                                                                                                                                                                                                                                                                                                    | UK Biobank field |
|---------------------------------------|--------------------------------------------------------|--------------------------------------------------------------------------------------------------------------------------------------------------------------------------------------------------------------------------------------------------------------------------------------------------------------------------------------------------------------------------------------------------------------------------------------------------------------------------------------------------------------------------------------------------------------------------------------------------------------------------------------------------------------------------------------------------------------------------------------------------------------------------------------------------------------------------------------------------------------------|------------------|
| ICD-10                                | -                                                      | F01, F02, F03, F10, F11, F12, F13, F14, F15, F16, F17, F18, F19, F20, F21, F22, F25, F31, F33, F70, F71, F72, F73, F78, F79, K50, K500, K501, K508, K509, K51, K510, K511, K512, K513, K514, K515, K518, K519, K52, K520, K521, K523, K528, K529, K550, K551, K627, K86, K860, K861, K862, K863, K868, K869, K90, K900, K901, K903, K904, K908, K909, C15, C16, C17, C18, C19, C20, C21, C22, C23, C24, C25, C26C71, D330, I10, I60, I61, I63, S060, S061, S062, S063, S064, S065, S066, S067, S068, S069, G00, G01, G02, G03, G04, G05, G06, G07, G08, G09, G10, G11, G12, G13, G14, G20, G21, G22, G23, G24, G25, G26, G30, G31, G32, G35, G36, G37, G40, G41, G42, G43, G44, G45, G46, G47, G50, G51, G52, G53, G54, G55, G56, G57, G58, G59, G60, G61, G62, G63, G64, G70, G71, G72, G73, G80, G81, G82, G83, G90, G91, G92, G93, G94, G95, G96, G97, G98, G99 | 41270            |
| OPCS-4                                | -                                                      | G01, G02, G03, G05, G06, G08, G27, G28, G31, G32, G33, G34, G49, G51, G58, G60, G61, G69, G71, G72, G73, G74, G75, H04, H05, H06, H07, H08, H09, H10, H11, H13, H14, H29, H33, H47, H57, H68, H69, H70                                                                                                                                                                                                                                                                                                                                                                                                                                                                                                                                                                                                                                                             | 41272            |
| Self-reported non-cancer illness code | -                                                      | 1135, 1164, 1165, 1191, 1456, 1459, 1461, 1462, 1463, 1509, 1600, 1601, 1602                                                                                                                                                                                                                                                                                                                                                                                                                                                                                                                                                                                                                                                                                                                                                                                       | 20002            |
| Coeliac/Gluten sensitivity            | Method of coeliac disease/gluten sensitivity diagnosis | Except 'self-diagnosis from symptoms'                                                                                                                                                                                                                                                                                                                                                                                                                                                                                                                                                                                                                                                                                                                                                                                                                              | 21069            |

Supplementary Table 3. **Definitions used for IBS group based on ROME III criteria**

| Prompt                                                                                                                                      | Positive answer                                       | UK Biobank field |
|---------------------------------------------------------------------------------------------------------------------------------------------|-------------------------------------------------------|------------------|
| Frequency of discomfort/pain in abdomen in last 3 months                                                                                    | 2-3 times per month or more                           | 21025            |
| For female: Discomfort/pain occurring only during menstrual bleed                                                                           | No or not applicable                                  | 21026            |
| Abdominal discomfort/pain for 6 months or longer                                                                                            | Yes                                                   | 21027            |
| At least two of:                                                                                                                            |                                                       |                  |
| Frequency of discomfort/pain getting better or stopping after a bowel movement                                                              | At least sometimes                                    | 21028            |
| More frequent bowel movements when abdominal discomfort/pain started / Less frequent bowel movements when abdominal discomfort/pain started | At least sometimes to at least one of these questions | 21029, 21030     |
| Stools looser when abdominal discomfort/pain started / Frequency of harder stools when abdominal discomfort/pain started                    | At least sometimes to at least one of these questions | 21031, 21032     |

Supplementary Table 5. **Regions of interest (ROIs) related to IBS based on previous studies.** Short name stands for region's name in Destrieux parcellation. Both left and right hemispheres of listed regions were included in the current study.

| Short name            | Long name                                      | Short name                | Long name                                                                            |
|-----------------------|------------------------------------------------|---------------------------|--------------------------------------------------------------------------------------|
| S_front_sup           | Superior frontal sulcus                        | S_intrapariet_and_P_trans | Intraparietal sulcus (intraparietal sulcus) and transverse parietal sulci            |
| G_front_sup           | Superior frontal gyrus (F1)                    | G_oc-temp_lat-fusifor     | Lateral occipito-temporal gyrus (fusiform gyrus, O4-T4)                              |
| S_front_inf           | Inferior frontal sulcus                        | G_temporal_middle         | Middle temporal gyrus (T2)                                                           |
| G_front_middle        | Middle frontal gyrus (F2)                      | G_and_S_cingul-Ant        | Anterior part of the cingulate gyrus and sulcus (ACC)                                |
| S_front_middle        | Middle frontal sulcus                          | G_and_S_cingul-Mid-Ant    | Middle-anterior part of the cingulate gyrus and sulcus (aMCC)                        |
| G_front_inf-Orbital   | Orbital part of the inferior frontal gyrus     | G_and_S_cingul-Mid-Post   | Middle-posterior part of the cingulate gyrus and sulcus (pMCC)                       |
| S_precentral-inf-part | Inferior part of the precentral sulcus         | G_cingul-Post-dorsal      | Posterior-dorsal part of the cingulate gyrus (dPCC)                                  |
| S_precentral-sup-part | Superior part of the precentral sulcus         | G_cingul-Post-ventral     | Posterior-ventral part of the cingulate gyrus (vPCC, isthmus of the cingulate gyrus) |
| G_precentral          | Precentral gyrus                               | S_orbital_med-olfact      | Medial orbital sulcus (olfactory sulcus)                                             |
| G_postcentral         | Postcentral gyrus                              | G_orbital                 | Orbital gyri                                                                         |
| S_postcentral         | Postcentral sulcus                             | G_rectus                  | Straight gyrus, Gyrus rectus                                                         |
| G_and_S_subcentral    | Subcentral gyrus (central operculum) and sulci | S_circular_insula_ant     | Anterior segment of the circular sulcus of the insula                                |
| S_central             | Central sulcus (Rolando's fissure)             | S_circular_insula_inf     | Inferior segment of the circular sulcus of the insula                                |
| G_pariet_inf-Supramar | Supramarginal gyrus                            | G_cuneus                  | Cuneus (O6)                                                                          |
| G_parietal_sup        | Superior parietal lobule (lateral part of P1)  | Lat_Fis-post              | Posterior ramus (or segment) of the lateral sulcus (or fissure)                      |

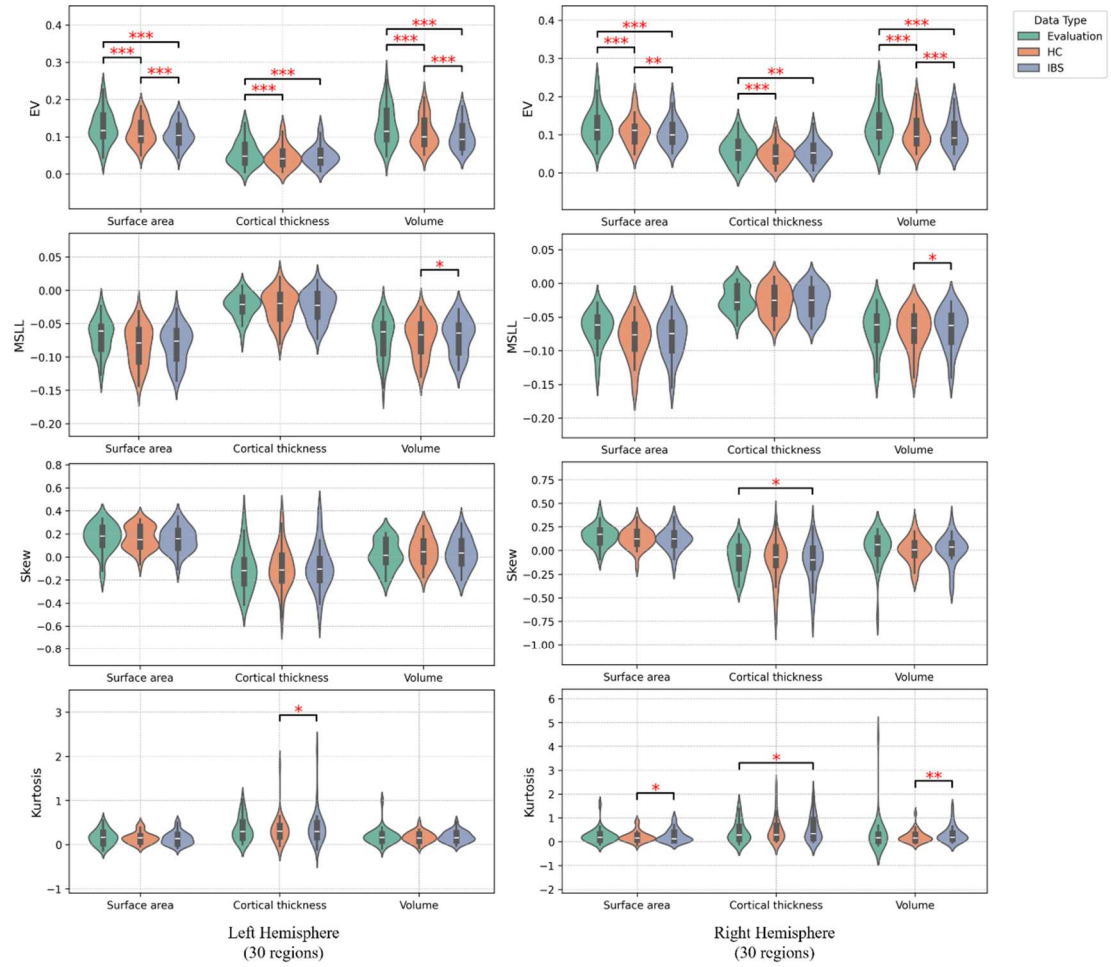

Supplementary Figure 1. **Comparison of evaluation metrics across the evaluation, healthy control (HC), and IBS datasets.**

One-side t-tests were performed under the hypothesis that normative models (NMs) would perform best on the evaluation dataset, followed by the HC dataset, and worst on the IBS dataset. Marker representation: \*:  $p < 0.05$ ; \*\*:  $p < 0.01$ ; \*\*\*  $p < 0.001$ . Abbreviation: EV, explained variance; MSLL, mean standardized log loss.

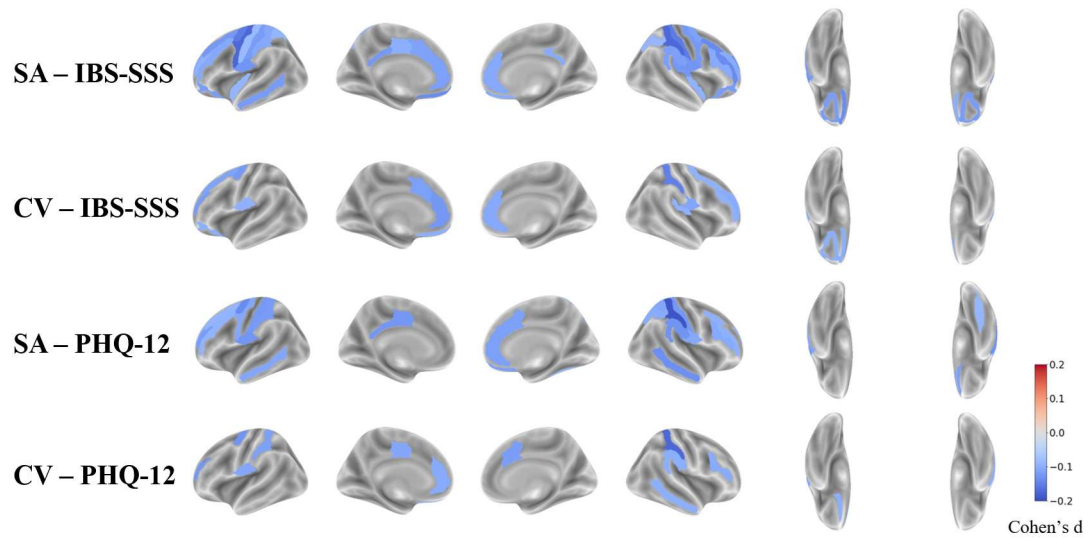

Supplementary Figure 2. **Within IBS cortical brain-phenotype associations.** Brain maps showing cortical regions in which cortical deviation scores were significantly associated with IBS symptom severity (IBS-SSS) or somatic pain severity (PHQ-12) after FDR correction. Effect sizes (Cohen's d) correspond to correlation coefficients. No significant associations were observed for depression (PHQ-9) or anxiety (GAD-7).

**a PHQ-12**

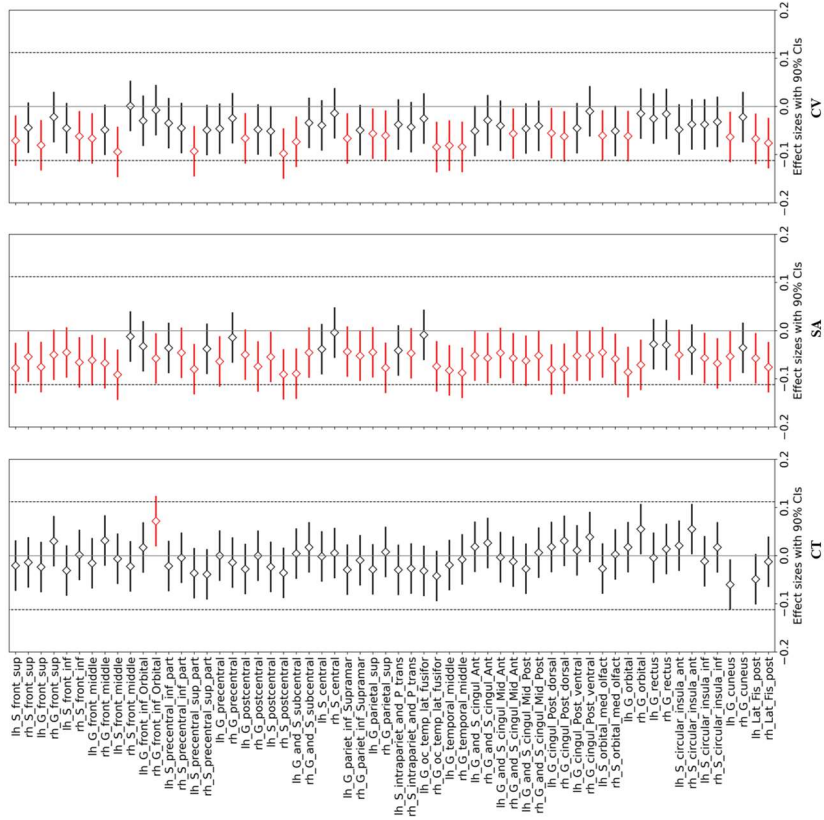

**b PHQ-9**

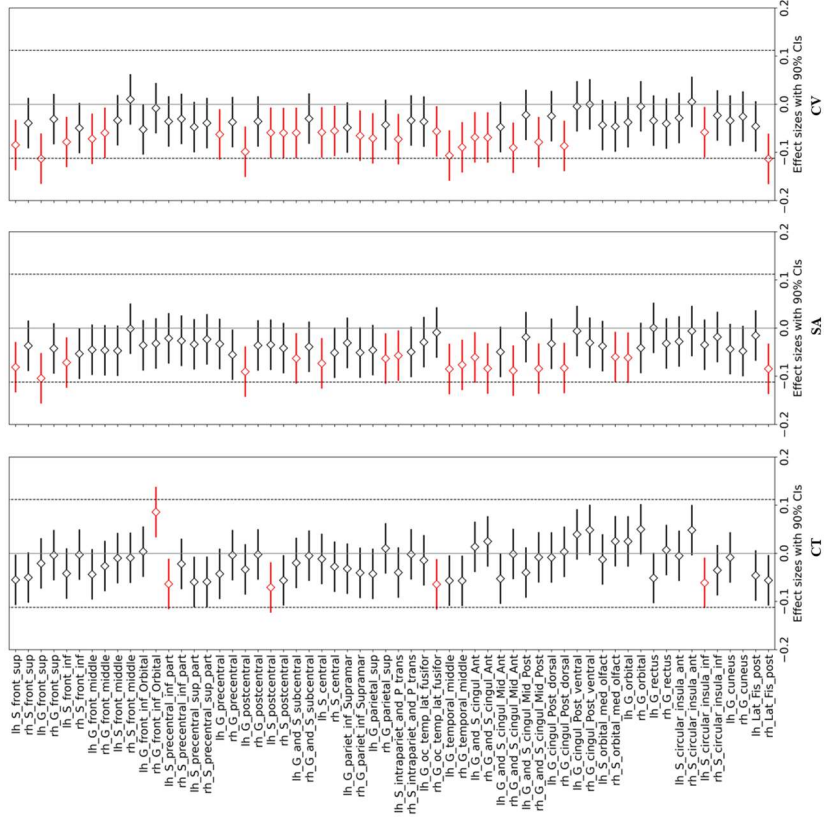



### c GAD-7

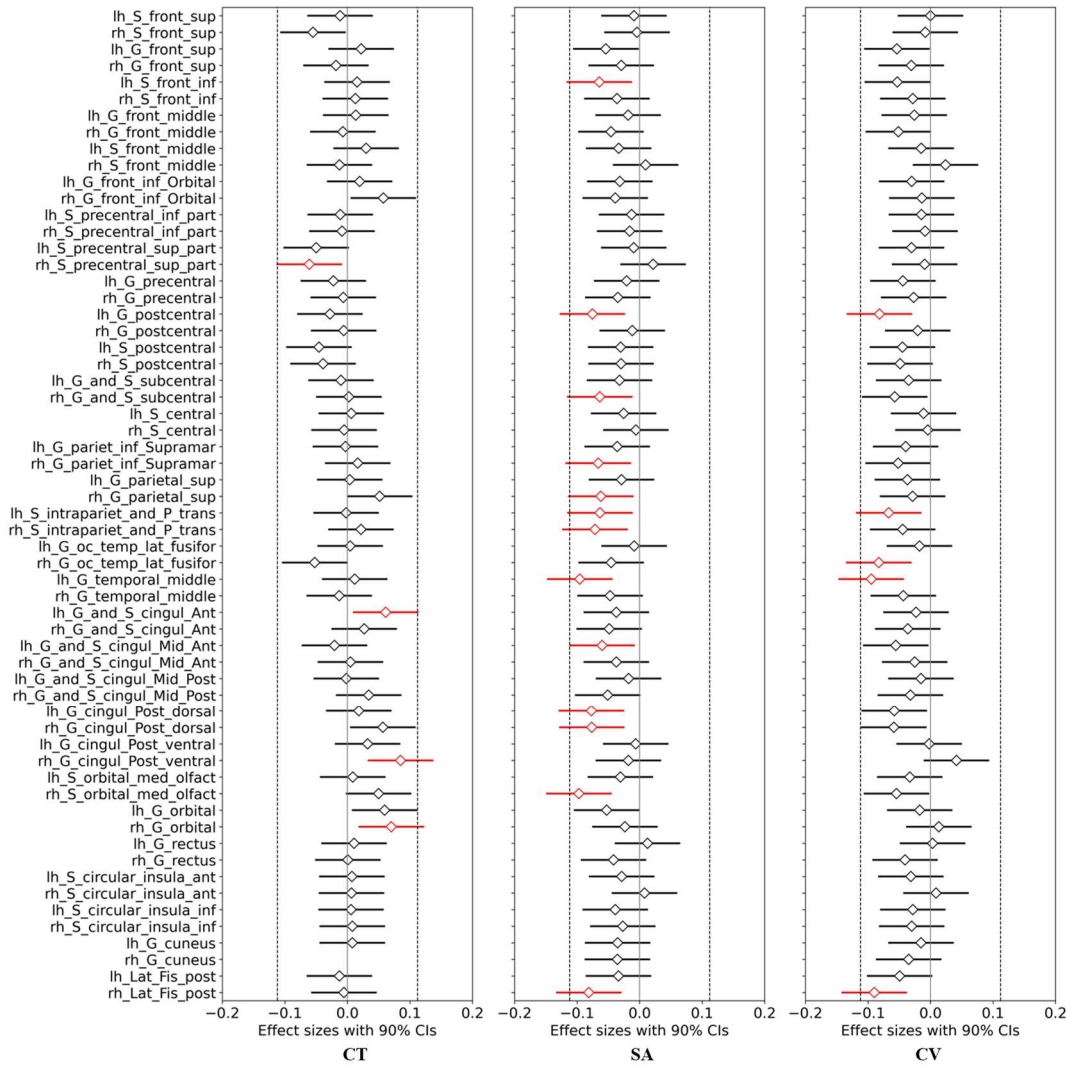

Supplementary Figure 3. **Forest plots of cortical brain-phenotype correlation differences between IBS and HCs.** Forest plots show the effect sizes (Cohen's  $q$ ) and 90% CIs for group differences in cortical brain-phenotype associations across all ROIs for **a** PHQ-12, **b** PHQ-9 and **c** GAD 7. Forest plots for IBS-SSS are available in the main draft in Figure 3.b. Equivalence test was applied using a SESOI of  $|0.112|$ . Regions in red with CIs overlapped the equivalence bounds are marked as inconclusive.

**a IBS-SSS**

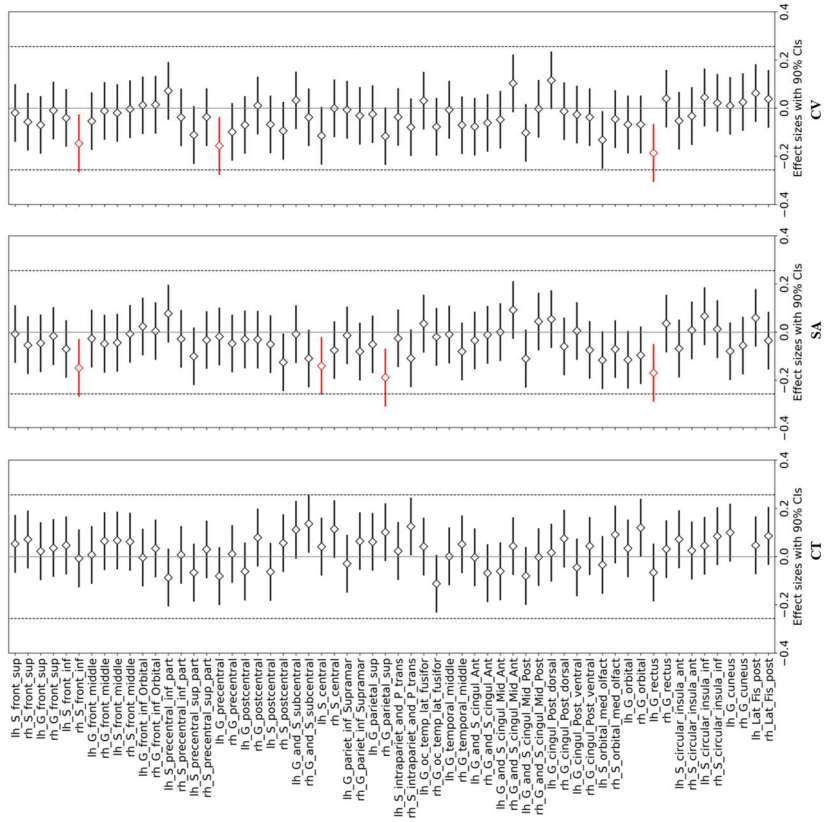

**b PHQ-12**

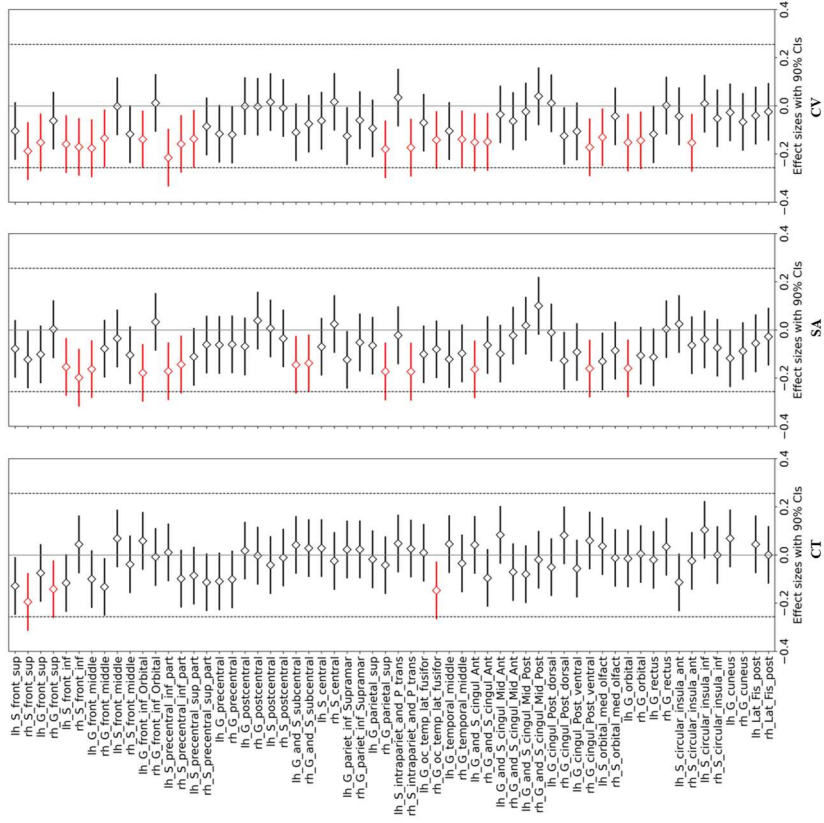

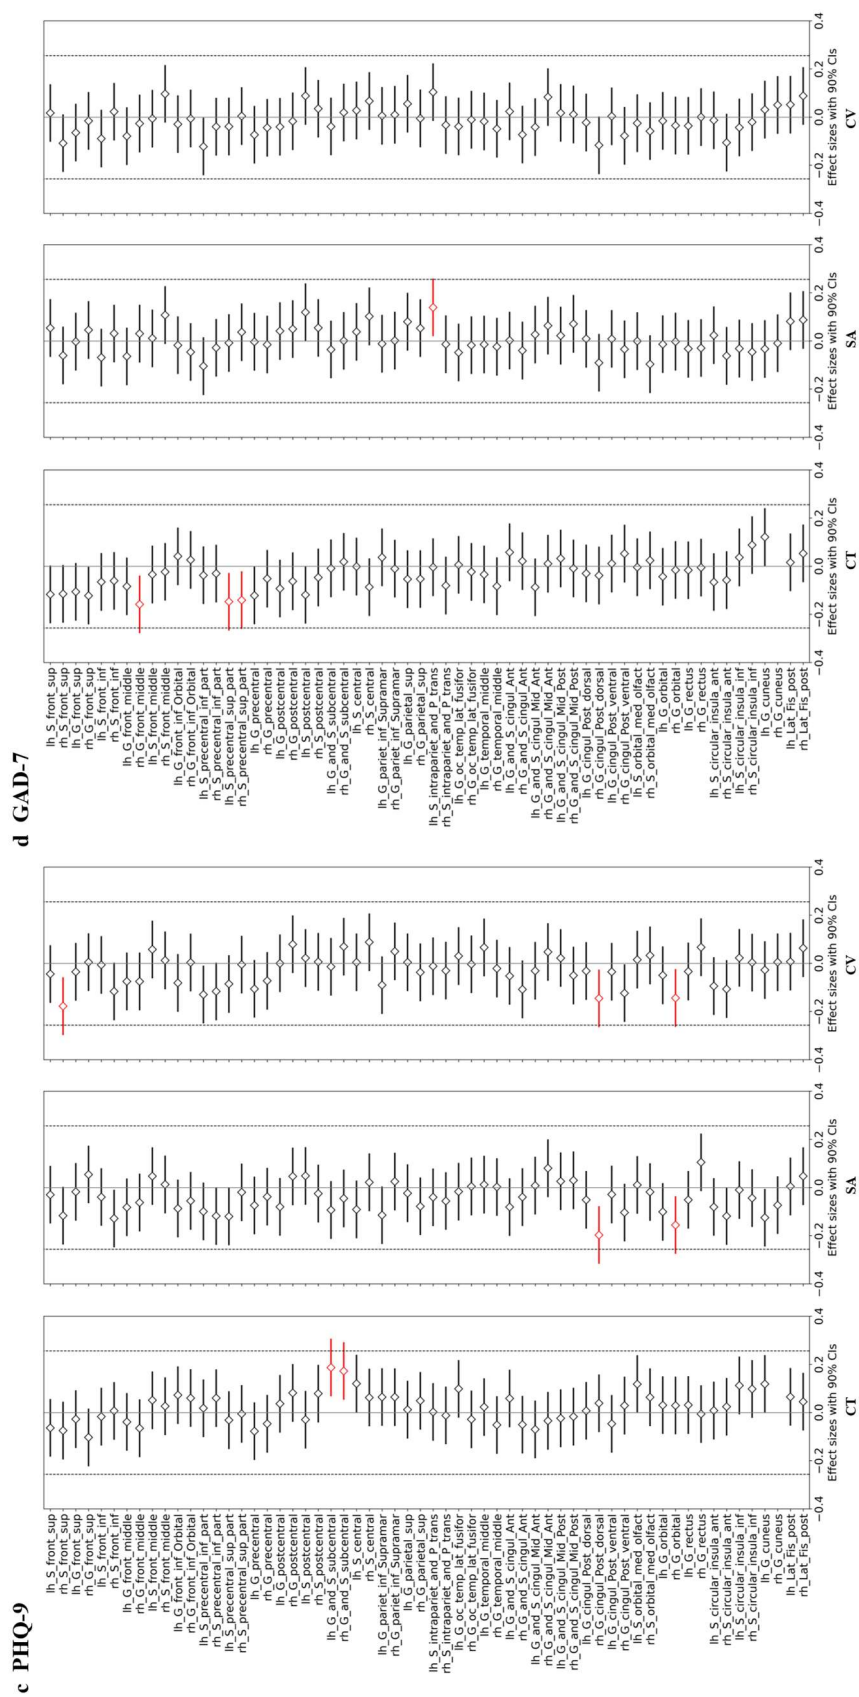

Supplementary Figure 4. Forest plots of difference-in-differences effect sizes for group  $\times$  sex interaction effects. Forest plots show difference-in-differences effect sizes and 90% CIs for sex moderation of brain-phenotype associations across all ROIs for **a** IBS-SSS, **b** PHQ-12, **c** PHQ-9 and **d** GAD 7. Equivalence test was applied using a SESOI of 0.256|. Regions in red with CIs overlapped the equivalence bounds are marked as inconclusive.
