# Supplementary material for: No replicable morphometry variations and limited morphometry-phenotype associations for cortical neuroimaging in irritable bowel syndrome
Source: Research Square preprint supplement (doi:10.21203/rs.3.rs-8232200/v1), 2025-12-08
Supplement: Supplementary file 2 [file efab90b2f7091db64f382107.xlsx]

## Sheet: S-T1
Supplementary Table 1. The exclusion criteria applied to define the healthy reference and healthy control groups. Participants were excluded based on any positive indication of relevant medical conditions from multiple sources: ICD-10 diagnostic codes from hospital admissions, surgical operations and procedures (OPCS-4) codes, self-reported non-cancer illness codes, and Digestive Health Questionn…
Criteria	Prompt	Positive answer	UK Biobank field
ICD-10	-	K50, K500, K501, K508, K509, K51, K510, K511, K512, K513, K514, K515, K518, K519, K52, K520, K521, K523, K528, K529, K550, K551, K580, K589, K627, K86, K860, K861, K862, K863, K868, K869, K90, K900, K901, K903, K904, K908, K909, C15, C16, C17, C18, C19, C20, C21, C22, C23, C24, C25, C26, K522, K5221, K5222, K5229, K57, K59, I60, I61, I63, F01, F02, F03, F10, F11, F12, F13, F14, F15, F16, F17, F18…	41270
OPCS-4	-	G01, G02, G03, G05, G06, G08, G27, G28, G31, G32, G33, G34, G49, G51, G58, G60, G61, G69, G71, G72, G73, G74, G75, H04, H05, H06, H07, H08, H09, H10, H11, H13, H14, H29, H33, H47, H57, H68, H69, H70	41272
Self-reported non-cancer illness code	-	1135, 1154, 1164, 1165, 1191, 1456, 1458, 1459, 1461, 1462, 1463, 1509, 1510, 1562, 1599, 1600, 1601, 1602	20002
Any of these conditions	Frequency of discomfort/pain in abdomen in last 3 months	1 day a month or more	21025
	Frequency of hard/lumpy stools in the last 3 months	At least sometimes	21033
	Frequency of loose/mushy/watery stools in the last 3 months	At least sometimes	21034
	Method of coeliac disease/gluten sensitivity diagnosis	Except ‘self-diagnosis from symptoms’	21069
	Ever diagnosed with IBS	Yes	21024
At least one of the conditions	Frequency of depressed mood in last 2 weeks	More than half of the days	2050
	Frequency of unenthusiasm / disinterest in last 2 weeks	More than half of the days	2060
	Happiness	Very unhappy or extremely unhappy	4526
	At least one symptom for at least three of four symptom groups related to depression	Mood symptoms, sleep problems, Psychomotor symptoms, Interpersonal symptoms	Mood: 1930, 1960, 2050, 2060, 4526
			Sleep: 1170, 1200
			Psychomotor: 2070, 2080
			Interpersonal: 1940, 1950, 2020, 2030
All the following criteria	At least five of the eight symptoms at the same time	a. Ever had prolonged feelings of sadness or depression	20446, 20441, 20450, 20449, 20435, 20427, 20536, 20532
		b. Ever had prolonged loss of interest in normal activities (At least one of first two)
		c. Feelings of worthlessness during worst period of depression
		d. Feelings of tiredness during worst episode of depression
		e. Difficulty concentrating during worst depression
		f. Thoughts of death during worst depression
		g. Weight change during worst episode of depression
		h. changes in sleeping patterns
	low mood or lack of interest	Every day or almost every day during the episode, with feelings lasting most of the day or all day	20439, 20436
	Impact on normal roles during worst period of depression	At least a little	20440

## Sheet: S-T4
Supplementary Table 4. Clinical questionnaires applied in this study in UK Biobank. Questionnaires include IBS symptom severity score (IBS-SSS), the patient health questionnaire-12 (PHQ-12) somatic symptom score, PHQ-9 depression score and generalized anxiety disorder-7 (GAD-7) anxiety score. To avoid bias caused by sex, menstrual symptoms were excluded in PHQ-12.
Questionnaire	Prompt	Scoring	UK Biobank field
IBS-SSS	Q1: Currently (in last 3 months) suffer from abdominal pain	Q1: Yes	21035, 21036
	Q2: Severity of current abdominal pain	Q2: From 0-No pain to 10-Very severe pain
	Q1: Currently (in last 3 months) suffer from abdominal pain	Q1: Yes	21035, 21037
	Q3: Number of days (out of 10) with abdominal pain	Q3: From 0-No days with pain to 10-10 days with pain
	Q4: Currently suffer from abdominal distension	Q4: Yes	21038, 21039
	Q5: Severity of current abdominal distension/tightness	Q5: From 0-No distension to 10-Very severe distension
	Q6: Satisfaction with bowel habits	Q6: From 0-Very happy to 10-Very unhappy	21040
	Q7: Degree to which abdominal pain/discomfort/altered bowel habits affect/interfere with life in general	Q7: From 0-Not at all to 10-Completely	21041
PHQ-12	Degree bothered by back pain in the past 3 months	From 0-Not bothered at all to 2-Bothered a lot	21048
	Degree bothered by pain in arms/legs/joints in the past 3 months	From 0-Not bothered at all to 2-Bothered a lot	21049
	Degree bothered by headaches in the last 3 months	From 0-Not bothered at all to 2-Bothered a lot	21051
	Degree bothered by chest pain in the last 3 months	From 0-Not bothered at all to 2-Bothered a lot	21052
	Degree bothered by dizziness in the last 3 months	From 0-Not bothered at all to 2-Bothered a lot	21053
	Degree bothered by fainting spells in the last 3 months	From 0-Not bothered at all to 2-Bothered a lot	21054
	Degree bothered by feeling heart pound/race in the last 3 months	From 0-Not bothered at all to 2-Bothered a lot	21055
	Degree bothered by shortness of breath in the last 3 months	From 0-Not bothered at all to 2-Bothered a lot	21056
	Degree bothered by pain/problems during intercourse in the last 3 months	From 0-Not bothered at all to 2-Bothered a lot	21057
	Degree bothered by feeling tired all the time in the last 3 months	From 0-Not bothered at all to 2-Bothered a lot	21060
	Degree bothered by trouble sleeping in the last 3 months	From 0-Not bothered at all to 2-Bothered a lot	21061
PHQ-9	Recent feelings of inadequacy	From 0-Not at all to 3-More than half the days	20507
	Recent trouble concentrating on things	From 0-Not at all to 3-More than half the days	20508
	Recent feelings of depression	From 0-Not at all to 3-More than half the days	20510
	Recent poor appetite or overeating	From 0-Not at all to 3-More than half the days	20511
	Recent thoughts of suicide or self-harm	From 0-Not at all to 3-More than half the days	20513
	Recent lack of interest or pleasure in doing things	From 0-Not at all to 3-More than half the days	20514
	Trouble falling or staying asleep, or sleeping too much	From 0-Not at all to 3-More than half the days	20517
	Recent changes in speed/amount of moving or speaking	From 0-Not at all to 3-More than half the days	20518
	Recent feelings of tiredness or low energy	From 0-Not at all to 3-More than half the days	20519
GAD-7	Recent easy annoyance or irritability	From 0-Not at all to 3-Nearly every day	20505
	Recent feelings or nervousness or anxiety	From 0-Not at all to 3-Nearly every day	20506
	Recent inability to stop or control worrying	From 0-Not at all to 3-Nearly every day	20509
	Recent feelings of foreboding	From 0-Not at all to 3-Nearly every day	20512
	Recent trouble relaxing	From 0-Not at all to 3-Nearly every day	20515
	Recent restlessness	From 0-Not at all to 3-Nearly every day	20516
	Recent worrying too much about different things	From 0-Not at all to 3-Nearly every day	20520
* In PHQ-12, the menstrual symptoms were not included to not bias the score by sex. So there are 11 items in total.

## Sheet: S-T6
Supplementary Table 6. Evaluation metrics for normative models
ROI	Cortical thickness															Surface area															Cortical volume
	Evaluation dataset							HC dataset				IBS dataset				Evaluation dataset							HC dataset				IBS dataset				Evaluation dataset							HC dataset				IBS dataset
	EV	MSLL	Skew	Kurtosis	r	p	p_fdr	EV	MSLL	Skew	Kurtosis	EV	MSLL	Skew	Kurtosis	EV	MSLL	Skew	Kurtosis	r	p	p_fdr	EV	MSLL	Skew	Kurtosis	EV	MSLL	Skew	Kurtosis	EV	MSLL	Skew	Kurtosis	r	p	p_fdr	EV	MSLL	Skew	Kurtosis	EV	MSLL	Skew	Kurtosis
lh_S_front_sup	0.100923	-0.0523389	-0.335412	0.751722	0.319218	4.5558e-43	3.90497e-42	0.0824738	-0.0450251	-0.214304	0.362285	0.0738938	-0.0407917	-0.205043	0.497771	0.145783	-0.0837044	0.23398	-0.0468662	0.386779	1.36127e-64	5.10475e-64	0.115566	-0.088512	0.265874	0.159085	0.0988984	-0.0789331	0.217625	0.0305346	0.154456	-0.0879647	0.189165	-0.0124345	0.403327	9.07913e-71	3.40468e-70	0.108537	-0.0670851	0.23816	0.15329	0.0943317	-0.0617164	0.251531	0.171065
rh_S_front_sup	0.0935076	-0.0443558	-0.165498	0.312319	0.306593	1.2074e-39	8.04936e-39	0.0736877	-0.0486092	-0.153665	0.523536	0.0798834	-0.0437881	-0.230905	0.589655	0.111851	-0.0611234	0.158593	0.0780161	0.334699	1.64358e-47	2.90044e-47	0.107173	-0.08526	0.185907	0.179158	0.0959398	-0.075291	0.12088	0.0113785	0.112222	-0.0609994	0.198992	0.212126	0.336148	6.1062e-48	1.14491e-47	0.0993798	-0.0610067	0.201439	0.0875021	0.0933159	-0.0563586	0.19264	0.0997485
lh_G_front_sup	0.135725	-0.0469241	-0.0744422	0.025694	0.368514	3.29195e-58	9.87586e-57	0.127665	-0.0646969	-0.169512	0.194658	0.128505	-0.0610645	-0.101056	0.146774	0.214017	-0.120528	0.123334	0.00979367	0.462779	2.23723e-96	3.35584e-95	0.182299	-0.143244	0.0912348	0.0473535	0.164776	-0.135793	0.101941	0.0118939	0.253289	-0.146615	0.0276253	0.0398607	0.504876	2.99917e-118	1.7995e-116	0.206201	-0.129668	0.0120866	0.0129658	0.182112	-0.119303	0.059684	0.0348886
rh_G_front_sup	0.132004	-0.0476454	-0.0867455	-0.0266891	0.36335	1.75054e-56	3.50108e-55	0.117764	-0.0572781	-0.13744	0.127333	0.128948	-0.0592426	-0.0967776	0.106257	0.189408	-0.10674	0.0696687	-0.104893	0.436527	2.26822e-84	2.72186e-83	0.159265	-0.128514	0.1079	0.0187864	0.141683	-0.116507	0.0901946	0.0275483	0.23091	-0.131603	-0.0366908	-0.0660046	0.48165	9.27897e-106	1.85579e-104	0.184418	-0.117976	0.02427	0.0564309	0.167485	-0.10966	0.0538486	-0.00965057
lh_S_front_inf	0.0557927	-0.0268808	-0.090419	0.611697	0.236207	1.32705e-23	2.84369e-23	0.0452896	-0.0208347	-0.213279	0.646777	0.0475571	-0.0241865	-0.132998	0.473691	0.103274	-0.0583355	0.149513	0.175297	0.322165	6.82407e-44	1.02361e-43	0.0921095	-0.0499988	0.243518	0.250432	0.0899638	-0.056716	0.240221	0.128626	0.115134	-0.061709	0.191501	0.158931	0.339761	5.04327e-49	1.00865e-48	0.106825	-0.0556575	0.26349	0.499112	0.101216	-0.0575685	0.293029	0.26735
rh_S_front_inf	0.0552295	-0.0276502	-0.103482	1.53409	0.235129	2.14226e-23	4.43226e-23	0.0435864	-0.0204316	-0.254284	0.768529	0.0416455	-0.0195176	-0.303733	1.15155	0.0978132	-0.0540691	0.198761	0.148379	0.314182	1.10979e-41	1.44755e-41	0.0784434	-0.0501376	0.233605	0.228367	0.0775535	-0.0466148	0.330576	0.280825	0.119896	-0.0659414	0.227397	0.246798	0.349162	6.47597e-52	1.43911e-51	0.0899811	-0.0498469	0.29922	0.338533	0.0865276	-0.0466849	0.312907	0.338504
lh_G_front_middle	0.136611	-0.0736873	-0.185339	0.254579	0.371756	2.60846e-59	1.56508e-57	0.114154	-0.0803319	-0.143556	0.146704	0.111315	-0.0730052	-0.127056	0.250631	0.158658	-0.0885076	0.144738	-0.13827	0.40115	6.20537e-70	3.10269e-69	0.141987	-0.107251	0.0898511	0.0455067	0.121305	-0.0981746	0.0793774	-0.0075587	0.195015	-0.110614	0.0188153	-0.0918134	0.445897	1.59945e-88	1.19959e-87	0.171622	-0.105291	-0.00224424	0.0776525	0.150856	-0.096335	-0.100635	0.0218447
rh_G_front_middle	0.117787	-0.0626378	-0.0655997	0.281663	0.344678	1.59851e-50	2.39776e-49	0.10212	-0.069607	-0.117352	0.215026	0.105695	-0.0672837	-0.0840046	0.102933	0.125029	-0.0671518	0.18702	0.244572	0.353612	2.54307e-53	5.86862e-53	0.120325	-0.0844872	0.0931392	-0.136731	0.118871	-0.0904485	0.0898203	-0.0213784	0.165811	-0.0910376	0.149289	0.0598549	0.407335	2.53418e-72	1.08608e-71	0.154539	-0.0899711	-0.00327783	-0.0764567	0.148768	-0.0920699	0.0024777	-0.0472632
lh_S_front_middle	0.0890606	-0.0439984	-0.0676381	0.753631	0.298482	1.54518e-37	8.42824e-37	0.0611965	-0.0320527	0.0102287	0.562314	0.0692671	-0.0362222	0.0249016	0.480643	0.143758	-0.0835892	0.0336646	0.176835	0.382371	5.1892e-63	1.63869e-62	0.126073	-0.0889034	0.128919	0.197832	0.109059	-0.0786851	0.113054	0.0215034	0.146104	-0.08075	0.209229	0.0747836	0.386422	1.83258e-64	5.23595e-64	0.118425	-0.0708028	0.249076	0.127018	0.108598	-0.0663197	0.188849	0.103423
rh_S_front_middle	0.0783299	-0.0387675	-0.195264	0.832516	0.280678	3.71719e-33	1.31195e-32	0.0595254	-0.0276989	-0.0679937	1.03819	0.0527755	-0.0247291	-0.0863311	1.20567	0.145356	-0.0790575	0.181614	-0.0499693	0.382775	3.72808e-63	1.24269e-62	0.12742	-0.0974479	0.139557	0.114593	0.129983	-0.100785	0.147001	0.0478288	0.148609	-0.0840581	0.223997	-0.038679	0.389152	1.86972e-65	5.90439e-65	0.121582	-0.0814894	0.195203	0.0254902	0.129379	-0.0870623	0.201517	-0.0429725
lh_G_front_inf_Orbital	0.0378918	-0.00959524	0.0239742	0.149383	0.194777	2.28152e-16	3.25932e-16	0.0353418	-0.00354798	0.0668076	0.213342	0.047303	-0.0153404	-0.0236379	0.240538	0.0594541	-0.031612	0.320608	0.263356	0.245711	1.74572e-25	1.8376e-25	0.0502561	-0.0313338	0.250968	0.375266	0.0437582	-0.0275092	0.174192	0.193242	0.0777656	-0.0437839	0.0209178	0.211708	0.279565	6.81263e-33	8.17515e-33	0.0668707	-0.0353038	0.0300425	0.273045	0.0614158	-0.0322991	-0.0787399	0.326556
rh_G_front_inf_Orbital	0.0396889	-0.00463863	0.105352	0.10756	0.199229	4.50683e-17	6.93358e-17	0.0395049	-0.0225318	0.0677615	0.35885	0.0474716	-0.0202633	0.0265244	0.227511	0.0720312	-0.0454906	0.246334	0.389647	0.271182	5.93485e-31	6.59428e-31	0.0483743	-0.0354	0.101862	0.327641	0.0503694	-0.0345243	0.126476	0.465477	0.0768664	-0.0420984	-0.00424152	0.264501	0.277789	1.77984e-32	2.09392e-32	0.0587868	-0.0335576	-0.136585	0.135692	0.0594602	-0.0337671	-0.217731	0.36129
lh_S_precentral_inf_part	0.0547965	-0.0271823	-0.257538	0.476535	0.234151	3.30101e-23	6.60203e-23	0.0407117	-0.0250126	-0.233196	0.432155	0.0437848	-0.0266452	-0.236185	0.538209	0.0436815	-0.0233569	0.307864	0.162081	0.215514	8.4912e-20	8.4912e-20	0.0714097	-0.0511578	0.277346	0.176275	0.0646927	-0.0492434	0.281344	0.153248	0.04807	-0.024625	0.150527	0.163075	0.222897	4.1276e-21	4.1276e-21	0.070554	-0.0429967	0.267371	0.218124	0.063955	-0.0413459	0.171293	0.159782
rh_S_precentral_inf_part	0.0526569	-0.0255579	-0.338563	1.01814	0.230333	1.74992e-22	3.28111e-22	0.0394524	-0.0253533	-0.350707	0.797154	0.0425608	-0.025234	-0.418987	1.00108	0.050014	-0.0286545	0.199472	0.310468	0.223673	2.98523e-21	3.03583e-21	0.0491652	-0.0380571	0.190458	0.211471	0.0629976	-0.0452871	0.196788	0.512501	0.0536695	-0.0287752	0.0695986	0.741004	0.232102	8.11289e-23	8.39264e-23	0.0491077	-0.0313976	0.128542	0.401401	0.0565216	-0.0351328	0.052269	0.834996
lh_S_precentral_sup_part	0.0531776	-0.028357	-0.313222	0.700971	0.232784	6.01948e-23	1.16506e-22	0.0430086	-0.0340624	-0.206938	0.359778	0.0412231	-0.0309201	-0.245401	0.382869	0.103371	-0.0560367	0.217394	0.294958	0.326694	3.52588e-45	5.87647e-45	0.0747835	-0.0616364	0.164754	0.0648369	0.0748157	-0.0667431	0.115511	0.0176876	0.0923004	-0.0497269	0.0971695	0.255671	0.312539	3.10072e-41	4.22826e-41	0.0626913	-0.0432711	0.164523	0.153067	0.0591779	-0.0446991	0.0598029	0.263074
rh_S_precentral_sup_part	0.042683	-0.0215353	-0.341235	1.13282	0.207437	2.04022e-18	3.30846e-18	0.0379541	-0.0341909	-0.722729	2.26737	0.0450234	-0.0309856	-0.694006	1.98756	0.0728809	-0.0385248	0.237003	0.359485	0.269965	1.12002e-30	1.22184e-30	0.0817273	-0.063119	0.212868	0.127922	0.0655687	-0.0567165	0.125864	0.0381559	0.0561894	-0.0299599	0.18354	0.7753	0.237062	9.05703e-24	9.53371e-24	0.0620586	-0.0382644	0.0942825	0.527487	0.0491898	-0.035923	0.0183411	0.65122
lh_G_precentral	0.109352	-0.0534695	-0.403209	0.307644	0.332585	6.89569e-47	8.27483e-46	0.0913406	-0.0545572	-0.405342	0.439883	0.0959258	-0.0534974	-0.403927	0.543385	0.166457	-0.0940445	0.302551	0.19232	0.408891	6.22798e-73	4.15199e-72	0.153833	-0.121203	0.215947	0.0784769	0.136882	-0.116649	0.217725	0.228215	0.19754	-0.109599	-0.209354	0.128841	0.447421	3.27227e-89	2.8048e-88	0.162789	-0.0932988	-0.143238	0.315147	0.133174	-0.0811415	-0.19285	0.516917
rh_G_precentral	0.10083	-0.0495102	-0.343875	0.411856	0.317675	1.22035e-42	9.15264e-42	0.082157	-0.0542517	-0.550535	0.760406	0.0960216	-0.0587456	-0.524524	0.987808	0.154957	-0.0872204	0.4191	0.544319	0.393973	3.13373e-67	1.25349e-66	0.142243	-0.121905	0.28808	0.269847	0.137286	-0.116558	0.243081	0.405298	0.167288	-0.091166	-0.19283	0.614175	0.409014	5.5691e-73	2.57036e-72	0.149102	-0.0883748	-0.28562	0.608293	0.128923	-0.0784697	-0.400368	1.06892
lh_G_postcentral	0.0474905	-0.0243285	-0.0200404	0.0832181	0.217979	3.13365e-20	5.52997e-20	0.0503258	-0.0475634	0.0718697	0.0232771	0.0582908	-0.0567331	0.114876	0.11768	0.138583	-0.0783733	0.203129	0.193916	0.374291	3.5155e-60	9.17087e-60	0.126979	-0.0944189	0.299873	0.387132	0.116746	-0.0895509	0.350839	0.502416	0.0919798	-0.0488222	-0.0315391	0.164569	0.305924	1.81238e-39	2.31368e-39	0.0753003	-0.040128	0.109067	0.0976293	0.060705	-0.0293264	0.112709	0.030397
rh_G_postcentral	0.0599667	-0.0307896	0.0280594	0.274116	0.246454	1.23384e-25	2.84733e-25	0.0524932	-0.0451566	0.0779057	0.194691	0.0561983	-0.0527355	0.0536322	0.132045	0.100874	-0.0534918	0.341263	0.489507	0.317607	1.27398e-42	1.77765e-42	0.121534	-0.0941011	0.20687	0.565195	0.111036	-0.0962473	0.18773	0.703899	0.0731406	-0.0380626	0.0699513	0.282027	0.270671	7.75483e-31	8.94788e-31	0.0726274	-0.0387441	0.00330924	0.0979104	0.0621577	-0.0314555	-0.0285796	0.163976
lh_S_postcentral	0.0666545	-0.0327552	-0.20026	0.371035	0.258291	4.16974e-28	1.04244e-27	0.0589479	-0.0480576	-0.123124	0.314798	0.0647178	-0.0554807	-0.0987995	0.551617	0.107557	-0.0581502	-0.120978	0.453797	0.328312	1.20798e-45	2.07082e-45	0.101025	-0.0779519	0.0611376	0.424575	0.108235	-0.0815371	0.00896251	0.495335	0.101419	-0.0549282	-0.0201263	0.340283	0.320543	1.94544e-43	3.07175e-43	0.0911841	-0.0571822	0.0995115	0.301452	0.090916	-0.0540706	0.0410304	0.279229
rh_S_postcentral	0.0686718	-0.0332639	-0.00601504	0.450891	0.262547	4.99515e-29	1.41873e-28	0.0555631	-0.0512069	-0.0584179	0.205645	0.0538804	-0.0474263	-0.114188	0.21901	0.0629511	-0.0345793	-0.0290255	0.333399	0.250926	1.49139e-26	1.59791e-26	0.0774926	-0.0540404	-0.165937	0.820638	0.0689527	-0.0534184	-0.180951	0.991302	0.0582018	-0.0301479	0.124368	0.117354	0.241838	1.04373e-24	1.11828e-24	0.0650113	-0.0346591	0.0354227	0.193247	0.0492685	-0.0271123	0.0515353	0.340757
lh_G_and_S_subcentral	0.032901	-0.00237779	0.0527805	0.616632	0.181396	2.36048e-14	3.14731e-14	0.0356497	-0.00238026	0.0348229	0.0718259	0.0297909	-0.000195406	0.0644947	0.133862	0.187709	-0.104668	0.262202	0.348125	0.434019	2.77277e-83	2.77277e-82	0.166919	-0.12702	0.296317	0.15962	0.145132	-0.121836	0.319724	0.226398	0.181267	-0.100844	0.161214	0.204047	0.426237	5.65879e-80	3.39527e-79	0.170912	-0.116246	0.143558	0.272563	0.142039	-0.103359	0.204258	0.247051
rh_G_and_S_subcentral	0.039131	-0.000271648	0.122136	0.307828	0.198285	6.37655e-17	9.56483e-17	0.0303985	0.00504649	0.0903364	0.132102	0.0277503	0.00151269	0.023024	0.137849	0.156556	-0.0859367	0.0972671	0.135653	0.397001	2.31473e-68	9.92029e-68	0.140457	-0.102066	0.215835	0.0850462	0.138879	-0.108055	0.242016	0.0919272	0.15973	-0.0876166	0.0538565	-0.0178126	0.40055	1.05087e-69	3.70895e-69	0.147497	-0.0962844	-0.00446531	0.0319249	0.138072	-0.0930604	0.0979592	0.12949
lh_S_central	0.0267208	-0.0118483	-0.204158	0.00860366	0.16408	5.70362e-12	6.84434e-12	0.016631	-0.00909204	-0.164332	0.000154824	0.0135875	-0.00415831	-0.182559	-0.11578	0.104913	-0.0558977	0.120634	0.192172	0.323914	2.18753e-44	3.454e-44	0.117867	-0.0982801	0.133577	0.470722	0.105298	-0.099878	0.0205841	0.351997	0.0679358	-0.0352493	-0.0801596	0.130437	0.260676	1.27612e-28	1.39213e-28	0.0817007	-0.0598583	-0.0458313	0.229962	0.063484	-0.056339	-0.0567402	0.0743698
rh_S_central	0.033974	-0.016082	-0.0425843	0.0341904	0.184358	8.71303e-15	1.18814e-14	0.0230863	-0.0142919	-0.0376633	-0.0101331	0.0251516	-0.0145202	-0.102628	-0.0217598	0.0882102	-0.0463519	0.221106	0.632151	0.298633	1.41421e-37	1.66378e-37	0.119374	-0.112699	0.063978	0.863483	0.0973356	-0.102039	-0.093085	0.913828	0.0482218	-0.0246692	0.00833013	0.238861	0.223169	3.6855e-21	3.74797e-21	0.0713393	-0.0593774	-0.028855	0.203754	0.0517045	-0.0497642	-0.0276932	0.154977
lh_G_pariet_inf_Supramar	0.0801384	-0.0412781	-0.124705	0.289088	0.284446	4.68421e-34	1.75658e-33	0.0628591	-0.0516099	-0.101135	0.30407	0.0640002	-0.0474896	-0.104647	0.25228	0.158627	-0.0888735	0.212586	0.159907	0.401673	3.91734e-70	2.13673e-69	0.140929	-0.105265	0.266085	0.12044	0.133876	-0.10761	0.173941	0.00835485	0.18029	-0.101548	0.063441	0.0943917	0.429403	2.61607e-81	1.74405e-80	0.153155	-0.0980553	0.101168	0.0250598	0.138239	-0.0957041	-0.00361463	0.100666
rh_G_pariet_inf_Supramar	0.0880577	-0.0461203	-0.217417	0.116715	0.298171	1.85567e-37	9.27837e-37	0.0678557	-0.0511648	-0.190683	0.297751	0.0733041	-0.0495112	-0.139431	0.343235	0.0927805	-0.052563	0.199854	0.102089	0.304637	3.94921e-39	4.83576e-39	0.102398	-0.0719038	0.171606	0.0445023	0.0936556	-0.0747032	0.134542	0.0632443	0.116668	-0.0640521	0.0210611	0.219868	0.341927	1.11108e-49	2.35587e-49	0.114601	-0.0656094	-0.0549646	0.101763	0.0997964	-0.0639485	-0.0598134	0.199999
lh_G_parietal_sup	0.0769477	-0.0382689	-0.0971417	0.229656	0.277872	1.70146e-32	5.67152e-32	0.0728835	-0.0544592	0.0151336	0.306321	0.069117	-0.0508828	-0.0549443	0.161494	0.077016	-0.0408949	0.099891	0.0628023	0.278217	1.41258e-32	1.59914e-32	0.0669674	-0.0486891	0.0933243	-0.00932336	0.0640776	-0.0488064	0.0811293	0.164234	0.0996016	-0.0539487	-0.0486881	0.265085	0.317802	1.12553e-42	1.73158e-42	0.0804916	-0.0438658	-0.0837915	0.141511	0.0685043	-0.0371138	-0.131028	0.366378
rh_G_parietal_sup	0.0822218	-0.0426745	-0.0547459	0.381752	0.287103	1.06509e-34	4.26037e-34	0.072682	-0.0535808	-0.0389531	0.167424	0.0793505	-0.0563318	-0.0190455	0.0533756	0.078247	-0.040284	0.107761	0.0116346	0.280491	4.11593e-33	4.74915e-33	0.0581375	-0.0420217	0.0217493	0.299636	0.0567207	-0.0422731	0.0595913	0.234379	0.103183	-0.0519932	-0.111174	0.214155	0.321479	1.06323e-43	1.72416e-43	0.0635476	-0.0345787	-0.23641	0.529594	0.060851	-0.0306843	-0.217006	0.60431
lh_S_intrapariet_and_P_trans	0.0423274	-0.0197434	-0.189324	0.903752	0.205736	3.91806e-18	6.18641e-18	0.0471953	-0.0296113	-0.215873	0.613578	0.0491808	-0.0271253	-0.187836	0.508394	0.0577907	-0.0304767	0.171971	0.347973	0.240591	1.84371e-24	1.90728e-24	0.0697553	-0.0479525	0.0384453	-0.00241248	0.0654886	-0.0501348	0.0651693	0.215981	0.0697356	-0.0362511	0.202315	0.31119	0.264755	1.63409e-29	1.81565e-29	0.0781808	-0.0446454	0.0148236	0.13266	0.0650691	-0.0416539	0.0388882	0.156164
rh_S_intrapariet_and_P_trans	0.0667038	-0.0298225	-0.188346	0.694929	0.258822	3.2068e-28	8.36557e-28	0.0587209	-0.0414424	-0.0940273	0.385677	0.0659562	-0.0458003	-0.1125	0.926924	0.102701	-0.0545652	0.0809988	0.0942024	0.322498	5.49756e-44	8.45778e-44	0.0734606	-0.0599551	-0.00180394	0.173813	0.085095	-0.070542	0.0340935	0.144283	0.105185	-0.0561907	0.0969018	-0.16486	0.325847	6.16317e-45	1.02719e-44	0.0746049	-0.0442717	0.0187275	0.00569689	0.0793554	-0.0521048	0.0629597	0.108689
lh_G_oc_temp_lat_fusifor	0.0720561	-0.0178973	-0.235541	0.527031	0.268994	1.85472e-30	5.85701e-30	0.0441626	-0.00666454	-0.167277	0.257998	0.045296	-0.00437588	-0.219671	0.172113	0.120548	-0.0657347	0.201173	-0.0978694	0.350492	2.47539e-52	5.50087e-52	0.0922458	-0.0621098	0.141455	-0.0339135	0.104585	-0.0721047	0.157553	0.0882929	0.145976	-0.080545	-0.00326547	0.0782315	0.386899	1.23243e-64	3.69729e-64	0.111782	-0.0664497	-0.0336007	0.0741242	0.112101	-0.0705457	-0.0227044	0.135998
rh_G_oc_temp_lat_fusifor	0.0659006	-0.0241913	-0.183895	-0.0105983	0.25674	8.94872e-28	2.14769e-27	0.0620691	-0.0251174	-0.121273	0.156928	0.0525413	-0.0188678	-0.162125	0.197323	0.13193	-0.0707691	0.0831341	0.0607776	0.363571	1.47876e-56	3.69689e-56	0.121529	-0.0801745	0.0866929	-0.0156433	0.127933	-0.0953059	0.132874	0.00161099	0.1524	-0.0834829	-0.0346181	0.083751	0.390407	6.49812e-66	2.16604e-65	0.142024	-0.0830245	-0.0771306	-0.0287134	0.13416	-0.0856411	0.000961186	-0.0330154
lh_G_temporal_middle	0.0909045	-0.0213422	-0.318863	0.166072	0.303264	9.01905e-39	5.41143e-38	0.0615155	-0.00871204	-0.200887	0.175921	0.0620671	-0.00581321	-0.214435	0.138596	0.15848	-0.0866482	0.0419804	-0.0805197	0.398663	5.46829e-69	2.52383e-68	0.1599	-0.110038	0.0892934	0.169667	0.144177	-0.103306	0.163116	0.0964545	0.206198	-0.11553	-0.0974966	0.132902	0.454502	1.82681e-92	1.82681e-91	0.192966	-0.121407	-0.0525298	0.207274	0.173926	-0.115508	-0.0828372	0.0739129
rh_G_temporal_middle	0.0846298	-0.017282	0.0800128	0.179054	0.290945	1.21434e-35	5.2043e-35	0.0705643	-0.00921045	0.0379957	0.28279	0.0770498	-0.0108787	-0.0329745	0.255121	0.176679	-0.0991756	0.163909	0.022361	0.422264	2.54405e-78	2.18061e-77	0.157772	-0.113831	0.0854948	0.224901	0.151771	-0.117544	0.139229	0.0569328	0.243026	-0.1396	-0.00127537	0.123224	0.495388	5.14118e-113	1.54236e-111	0.206303	-0.132156	-0.0293104	0.248356	0.193255	-0.135554	-0.0472846	0.22647
lh_G_and_S_cingul_Ant	0.00480543	-0.00325806	0.169369	0.322309	0.0783107	0.00109897	0.00113687	0.00531221	-0.0064215	0.136772	0.404108	0.00693169	-0.00596734	0.145006	0.410396	0.168093	-0.0927462	0.113322	0.00308908	0.410291	1.74752e-73	1.31064e-72	0.156981	-0.118134	0.081983	0.0654031	0.149531	-0.113807	0.0705023	-0.0200501	0.173295	-0.0965806	-0.024771	0.0316693	0.416784	4.42716e-76	2.21358e-75	0.153834	-0.106299	0.00279241	0.104054	0.14961	-0.104737	-0.0564013	0.246135
rh_G_and_S_cingul_Ant	0.000196264	-0.00213189	0.117632	0.639769	0.0476269	0.0474278	0.0482316	0.0051863	-0.00289746	0.00133896	0.676565	0.00612519	-0.00393711	0.126981	0.587138	0.215354	-0.124201	0.260878	0.230618	0.465339	1.30331e-97	2.60663e-96	0.190074	-0.155463	0.120093	0.0806213	0.183151	-0.148681	0.125579	0.0878197	0.21735	-0.126372	0.219812	0.0686728	0.466698	2.85149e-98	4.27723e-97	0.189772	-0.139834	0.0393596	0.306444	0.189786	-0.139831	0.1243	0.188314
lh_G_and_S_cingul_Mid_Ant	0.0276471	-0.0137816	-0.415696	0.157	0.170199	8.76103e-13	1.09513e-12	0.0389209	-0.0359527	-0.525229	0.450627	0.0382307	-0.028718	-0.50308	0.326638	0.0987878	-0.0527342	0.315803	0.0838257	0.315021	6.54868e-42	8.73157e-42	0.0882918	-0.0549348	0.327843	0.197312	0.0831456	-0.0593586	0.33438	0.150079	0.0706277	-0.0368751	-0.12562	0.239331	0.267056	5.04189e-30	5.7078e-30	0.0519226	-0.0252358	-0.176512	0.327712	0.0523417	-0.0282547	-0.19859	0.356419
rh_G_and_S_cingul_Mid_Ant	0.0457917	-0.00208754	-0.38167	0.203299	0.21399	1.5629e-19	2.67926e-19	0.0419436	-0.00297716	-0.44762	0.651191	0.0534273	-0.00596959	-0.444193	0.661855	0.145456	-0.0805913	0.270776	0.201348	0.383841	1.55147e-63	5.47579e-63	0.117537	-0.0753495	0.193356	0.100824	0.11056	-0.0701797	0.256371	0.150135	0.120522	-0.0678384	-0.229969	0.681385	0.350587	2.31111e-52	5.33333e-52	0.100322	-0.0493489	-0.0960622	0.387477	0.0927543	-0.0468925	-0.0231146	0.463188
lh_G_and_S_cingul_Mid_Post	0.0499506	-0.025109	-0.180818	0.0831441	0.224934	1.75731e-21	3.1951e-21	0.0308163	-0.017795	-0.120949	0.350793	0.0376555	-0.0206351	-0.135348	0.211508	0.105207	-0.0564255	0.333162	0.325504	0.324965	1.09952e-44	1.78301e-44	0.0840499	-0.059356	0.257678	0.153996	0.0936997	-0.0644973	0.2519	0.144747	0.115875	-0.0621723	-0.0159587	0.262024	0.341892	1.13867e-49	2.35587e-49	0.080138	-0.0504287	-0.00257994	0.218301	0.0876196	-0.0582862	-0.0422596	0.128143
rh_G_and_S_cingul_Mid_Post	0.0678247	-0.0342165	-0.043251	0.16487	0.263542	3.02229e-29	9.06686e-29	0.0439105	-0.0252907	-0.1239	0.0307298	0.0542798	-0.029856	-0.181593	0.333576	0.124811	-0.0679853	0.186431	0.0678693	0.354902	9.8488e-54	2.36371e-53	0.111066	-0.0730582	0.221202	0.123422	0.0863863	-0.0650479	0.186839	0.0256316	0.131101	-0.07123	-0.0424189	0.32442	0.363163	2.01858e-56	5.04644e-56	0.118028	-0.0683929	-0.0137601	0.24441	0.102045	-0.0664181	0.0412659	0.29057
lh_G_cingul_Post_dorsal	0.0434012	-0.0104016	-0.115307	0.25498	0.209476	9.25889e-19	1.54315e-18	0.0292043	0.00059504	-0.0576106	0.238403	0.034197	0.00129654	-0.138715	0.441865	0.122269	-0.0683094	0.280707	0.449242	0.350219	3.0175e-52	6.24311e-52	0.117382	-0.0862691	0.161378	0.0750496	0.112078	-0.0807092	0.254719	0.0305452	0.128238	-0.0690592	-0.196393	0.997429	0.359101	4.3392e-55	1.04141e-54	0.117296	-0.0827979	-0.117241	0.340154	0.104992	-0.071085	0.0208305	0.314302
rh_G_cingul_Post_dorsal	0.0687231	-0.0357598	-0.284607	0.285135	0.262466	5.202e-29	1.41873e-28	0.0538912	-0.0406945	-0.385707	1.28377	0.0517859	-0.0376027	-0.414286	1.33109	0.101556	-0.0584256	-0.0957991	1.57595	0.319933	2.87923e-43	4.2135e-43	0.0993028	-0.0664549	0.143533	0.434694	0.0884078	-0.0631719	0.0118082	0.550625	0.0937813	-0.0483362	-0.706049	4.42192	0.306709	1.12509e-39	1.46751e-39	0.0913242	-0.0548716	-0.29542	1.18561	0.0816238	-0.0517614	-0.381038	1.43679
lh_G_cingul_Post_ventral	0.0269509	-0.0105515	0.0646125	0.046698	0.164241	5.43318e-12	6.65287e-12	0.00617033	-0.000451671	0.0384406	-0.0340063	0.0163862	-0.00456152	0.146854	0.201557	0.113378	-0.0633024	0.267814	0.283294	0.337218	2.92693e-48	5.66503e-48	0.0949596	-0.0796413	0.274387	0.198953	0.0915257	-0.0698462	0.205091	0.245517	0.107899	-0.058114	-0.0148095	0.0923323	0.328481	1.07938e-45	1.90479e-45	0.0830632	-0.0703567	0.0628374	-0.0179564	0.0904872	-0.0676052	0.0309412	0.151447
rh_G_cingul_Post_ventral	0.00751918	0.00398074	0.034152	-0.111254	0.093075	0.000103375	0.000112773	0.011932	0.00285105	0.115376	0.137821	0.00967304	0.00322474	0.147431	0.100146	0.0892477	-0.0496515	0.247749	0.0700052	0.299299	9.55024e-38	1.14603e-37	0.0707435	-0.053118	0.349643	0.383422	0.0743928	-0.0565046	0.354826	0.476206	0.0812417	-0.0432853	0.0740706	0.0218333	0.285167	3.139e-34	3.84367e-34	0.0892659	-0.0663377	-0.00721943	0.197923	0.0874395	-0.060522	0.0801047	0.117099
lh_S_orbital_med_olfact	0.0360312	-0.0207467	0.230191	1.0174	0.189998	1.24579e-15	1.73831e-15	0.0251633	-0.0123801	0.289489	1.79094	0.0284144	-0.0208668	0.345649	2.14461	0.121483	-0.0581522	-0.175412	0.198834	0.350408	2.63217e-52	5.64037e-52	0.0924851	-0.0590529	-0.064627	0.10965	0.0831899	-0.0591821	-0.108137	0.278913	0.162658	-0.0891457	0.0132758	0.0660469	0.404843	2.36088e-71	9.44353e-71	0.118223	-0.0861688	0.121906	0.0648435	0.119561	-0.0932466	0.0614138	0.118771
rh_S_orbital_med_olfact	0.00284141	-0.00247373	0.174256	1.39168	0.0790864	0.000979513	0.00103107	0.00761617	-0.00347102	0.302924	1.66381	0.00955997	-0.00835715	0.258209	1.65521	0.137587	-0.0770971	-0.00765596	0.332074	0.380077	3.37192e-62	1.01158e-61	0.0995068	-0.0730657	-0.00734378	0.273806	0.0944933	-0.07449	0.0554267	0.243146	0.141568	-0.078144	0.103459	0.00626211	0.380358	2.6831e-62	7.31756e-62	0.118668	-0.086086	0.0964758	0.0622495	0.110431	-0.0873591	0.132101	0.229016
lh_G_orbital	0.0380168	-0.0193766	-0.115981	0.318848	0.195055	2.06433e-16	3.02096e-16	0.0181737	-0.0139863	-0.10451	0.237377	0.0246173	-0.0162295	-0.0839133	0.278628	0.227257	-0.127045	0.0548893	0.078165	0.477061	2.04197e-103	6.12591e-102	0.174321	-0.129677	0.0726217	0.0333615	0.163003	-0.119299	0.0815578	0.0126388	0.210681	-0.118329	-0.174495	0.393279	0.459172	1.17234e-94	1.40681e-93	0.164394	-0.108072	-0.0519205	0.0374141	0.168559	-0.108658	-0.0530426	-0.0258691
rh_G_orbital	0.0197188	0.00615334	-0.00984227	-0.025343	0.140967	3.57812e-09	3.97569e-09	0.0114049	0.00308029	-0.0714599	0.167	0.0205537	0.000889277	-0.0168269	0.00535457	0.243317	-0.140308	0.111488	0.19659	0.494446	1.66224e-112	9.97345e-111	0.197682	-0.156139	0.0672021	0.0624727	0.200018	-0.154972	0.115997	0.0527587	0.178087	-0.0975256	-0.0346386	0.0144071	0.422118	2.92428e-78	1.59506e-77	0.163876	-0.112455	0.0158944	0.0688161	0.161424	-0.105462	0.00510153	0.123376
lh_G_rectus	0.0298017	0.00702116	-0.285425	0.329128	0.173278	3.3217e-13	4.33265e-13	0.00996938	0.0201996	-0.294166	0.395816	0.0192663	0.0156386	-0.334916	0.638826	0.101269	-0.0430355	0.0429886	0.0187909	0.318244	8.49266e-43	1.21324e-42	0.0996397	-0.0734364	0.11275	-0.0444776	0.0968809	-0.0736715	0.0494928	-0.0791307	0.0864437	-0.0445365	-0.120278	0.242407	0.294074	2.01678e-36	2.52097e-36	0.0773147	-0.0513237	-0.11122	0.199445	0.0770468	-0.0544833	-0.200699	0.262972
rh_G_rectus	0.0209246	0.000673093	-0.156025	0.248245	0.145095	1.21788e-09	1.37873e-09	0.0167796	0.00972019	-0.0659311	0.483756	0.0265169	0.00924001	-0.14905	0.631395	0.140151	-0.0694155	0.0541906	0.296436	0.378519	1.18987e-61	3.39963e-61	0.116522	-0.0774596	0.0284588	0.00128459	0.102723	-0.0721384	-0.0274901	0.0482771	0.114315	-0.0617521	-0.169255	0.310306	0.339677	5.3436e-49	1.03424e-48	0.0902267	-0.0482886	-0.159817	0.11426	0.0908069	-0.0554718	-0.0846941	0.541966
lh_S_circular_insula_ant	0.0230923	0.00201497	-0.0367354	0.029813	0.1521	1.82012e-10	2.10014e-10	0.0233243	0.00778921	-0.0797313	0.167879	0.0347519	-0.00203491	-0.0440031	0.379348	0.112357	-0.0560614	0.192873	0.0340628	0.335197	1.16958e-47	2.12651e-47	0.100252	-0.0665105	0.294799	0.241364	0.0982224	-0.0662054	0.231759	0.29119	0.0971975	-0.0513637	0.179842	0.0526025	0.312028	4.26159e-41	5.68212e-41	0.0838673	-0.0558438	0.247303	0.235491	0.0928448	-0.0609206	0.149874	0.197467
rh_S_circular_insula_ant	0.0231663	-0.00360779	0.0438553	-0.101333	0.152779	1.50654e-10	1.7724e-10	0.0265016	-0.00635691	0.0380615	0.132829	0.0306971	-0.00470844	-0.0196515	0.0740253	0.0942182	-0.0469025	0.114254	-0.0726176	0.308164	4.62761e-40	5.78451e-40	0.083947	-0.0567306	0.252311	0.122494	0.079965	-0.0526819	0.19892	0.077448	0.0982206	-0.0519481	0.164657	0.0964943	0.313629	1.56988e-41	2.19053e-41	0.0848861	-0.0622239	0.133209	0.174375	0.0902053	-0.0618296	0.134396	0.133425
lh_S_circular_insula_inf	0.0877567	-0.023087	-0.0606605	0.100265	0.296321	5.47796e-37	2.52829e-36	0.0661734	-0.00973721	-0.027185	-0.0018581	0.053659	-0.00857548	-0.0138209	0.114618	0.09602	-0.0514343	0.229953	0.544582	0.309897	1.59558e-40	2.03691e-40	0.103534	-0.075068	0.0629473	0.159505	0.103305	-0.0726663	0.101352	0.0543507	0.0984708	-0.0523107	0.178606	0.244412	0.314272	1.04857e-41	1.49796e-41	0.0972556	-0.0700245	0.115549	0.178694	0.085755	-0.0693978	0.175832	0.0103704
rh_S_circular_insula_inf	0.106491	-0.0338228	0.0456299	-0.0358773	0.326636	3.66496e-45	3.66496e-44	0.0768563	-0.0188714	0.0909053	0.0874794	0.0716955	-0.0171302	0.108591	0.141849	0.112854	-0.0593081	0.085352	0.173981	0.335944	7.02235e-48	1.31669e-47	0.0987944	-0.0957113	0.00360313	0.0373899	0.107142	-0.0939969	0.0266169	0.099708	0.112348	-0.0602227	0.0443885	-0.0817786	0.335194	1.17245e-47	2.13172e-47	0.0896811	-0.0691515	0.0520228	0.00245414	0.0851197	-0.0661557	0.0637517	0.016838
lh_G_cuneus	0.00682604	-0.00466623	0.349863	0.379448	0.0866918	0.000300498	0.000321962	0.00896733	-0.00689375	0.34973	0.509858	0.0108289	-0.00391839	0.377384	1.07066	0.0992235	-0.0533571	0.0949309	0.162889	0.315053	6.41788e-42	8.73157e-42	0.0914667	-0.0549471	0.0344731	0.155906	0.0763327	-0.0492889	0.0194364	-0.0137033	0.100518	-0.0522689	0.0207509	0.217789	0.3173	1.54864e-42	2.32296e-42	0.0957795	-0.0626081	0.0911044	-0.0741457	0.0879332	-0.0520195	0.0612506	0.0864899
rh_G_cuneus	-0.00355155	0.0014633	0.417291	0.776912	0.0459265	0.0559306	0.0559306	0.00365718	-0.00485184	0.320902	0.179043	0.00785593	-5.91981e-05	0.390044	0.454453	0.141554	-0.0776138	0.0828637	0.326709	0.376482	6.12324e-61	1.66997e-60	0.112648	-0.0748192	0.0873828	0.191707	0.104459	-0.072272	-0.0137756	0.333479	0.0982682	-0.05076	0.137089	0.611149	0.314797	7.54153e-42	1.10364e-41	0.0970925	-0.0720361	0.0877303	0.170328	0.104061	-0.0659973	0.0466249	0.301862
lh_Lat_Fis_post	0.0287788	-0.014994	0.115053	0.280181	0.171247	6.31036e-13	8.05577e-13	0.0390783	-0.0341834	-0.0272582	0.21944	0.0419424	-0.0338382	-0.0670734	0.138092	0.161281	-0.0896093	0.157677	0.0238414	0.404155	4.3539e-71	2.61234e-70	0.131258	-0.11522	0.180363	0.129672	0.141614	-0.125334	0.205234	0.175742	0.133156	-0.0736187	0.144404	0.127246	0.367761	5.90313e-58	1.53995e-57	0.103374	-0.0834737	0.148146	0.12613	0.116459	-0.0927673	0.15835	0.159433
rh_Lat_Fis_post	0.0567289	-0.0302087	0.0869219	0.906073	0.238186	5.47086e-24	1.21575e-23	0.0417205	-0.0269957	-0.00955721	0.300363	0.0507888	-0.0334648	0.0369672	0.647635	0.11346	-0.0624302	0.1888	0.190145	0.337419	2.54893e-48	5.09786e-48	0.117198	-0.0897995	0.130305	0.135519	0.114505	-0.09115	0.110066	0.198885	0.106744	-0.0561019	0.0828403	0.130555	0.328327	1.19618e-45	2.05059e-45	0.0940419	-0.0696012	0.0641593	0.0965156	0.0839119	-0.0627994	0.0358526	0.143197

## Sheet: S-T7
Supplementary Table 7. Parameter estimates for fixed effects of group
ROI	N	df	term	Cortical Thickness								Surface Area								Cortical Volume
				beta	se	ci_lower	ci_upper	t	p	Residual_var	p_fdr_bh	beta	se	ci_lower	ci_upper	t	p	Residual_var	p_fdr_bh	beta	se	ci_lower	ci_upper	t	p	Residual_var	p_fdr_bh
lh_S_front_sup	6826	6822	Group[T.IBS]	0.0145208	0.0245477	-0.0336004	0.0626421	0.591535	0.554182	0.810447	0.924693	0.00423227	0.0262833	-0.0472912	0.0557558	0.161025	0.872078	0.929098	0.983871	0.00445473	0.0261429	-0.0467935	0.055703	0.170399	0.864701	0.919199	0.954018
rh_S_front_sup	6826	6822	Group[T.IBS]	-0.0290518	0.0247169	-0.0775045	0.019401	-1.17538	0.239882	0.821652	0.849988	0.0188478	0.02636	-0.032826	0.0705216	0.715014	0.474625	0.934527	0.963689	0.0125475	0.0261655	-0.038745	0.0638401	0.479546	0.631566	0.920787	0.922022
lh_G_front_sup	6826	6822	Group[T.IBS]	-0.0031292	0.0223266	-0.0468964	0.040638	-0.140155	0.888541	0.670421	0.989049	-0.000237143	0.0275964	-0.0543347	0.0538604	-0.00859326	0.993144	1.02425	0.993144	-0.00567021	0.0271313	-0.0588561	0.0475156	-0.208991	0.834461	0.990018	0.954018
rh_G_front_sup	6826	6822	Group[T.IBS]	-0.00772426	0.0226053	-0.0520376	0.0365891	-0.341702	0.732586	0.68726	0.924693	0.000584288	0.0269097	-0.0521672	0.0533358	0.0217129	0.982678	0.973913	0.993144	-0.00375179	0.0265834	-0.0558635	0.0483599	-0.141133	0.887769	0.950432	0.954018
lh_S_front_inf	6826	6822	Group[T.IBS]	0.0023235	0.025498	-0.0476605	0.0523075	0.0911247	0.927396	0.874406	0.989049	-0.0205686	0.0260404	-0.0716158	0.0304787	-0.789873	0.429629	0.912002	0.963689	-0.0233523	0.027491	-0.0772432	0.0305386	-0.849452	0.39566	1.01644	0.906919
rh_S_front_inf	6826	6822	Group[T.IBS]	0.00194011	0.0252584	-0.0475742	0.0514544	0.0768106	0.938776	0.85805	0.989049	0.0289845	0.026521	-0.023005	0.0809739	1.09289	0.274482	0.945979	0.963689	0.0353723	0.0266649	-0.0168991	0.0876438	1.32655	0.184701	0.956268	0.780152
lh_G_front_middle	6826	6822	Group[T.IBS]	-0.0113059	0.0260419	-0.0623562	0.0397444	-0.434142	0.664199	0.91211	0.924693	-0.0166415	0.0274572	-0.0704662	0.0371831	-0.60609	0.544475	1.01394	0.963689	-0.0149457	0.0271881	-0.0682429	0.0383514	-0.549716	0.582532	0.994167	0.916403
rh_G_front_middle	6826	6822	Group[T.IBS]	0.0199149	0.0254679	-0.0300101	0.0698399	0.781961	0.434265	0.872343	0.920408	-0.0242377	0.0274585	-0.0780649	0.0295896	-0.8827	0.377429	1.01404	0.963689	-0.0124837	0.0271289	-0.0656649	0.0406975	-0.460161	0.645415	0.989845	0.922022
lh_S_front_middle	6826	6822	Group[T.IBS]	-0.0170434	0.0253928	-0.0668213	0.0327345	-0.671188	0.502124	0.86721	0.920408	0.0221834	0.0268547	-0.0304602	0.0748269	0.826052	0.408804	0.969933	0.963689	0.018974	0.0281587	-0.0362259	0.0741739	0.673823	0.500446	1.06642	0.916026
rh_S_front_middle	6826	6822	Group[T.IBS]	-0.000528696	0.0251152	-0.0497622	0.0487048	-0.0210509	0.983206	0.848346	0.989049	0.0121979	0.0278508	-0.0423985	0.0667942	0.437971	0.661421	1.04323	0.963689	0.0171372	0.0275777	-0.0369238	0.0711981	0.621413	0.534348	1.02286	0.916026
lh_G_front_inf_Orbital	6826	6822	Group[T.IBS]	-0.00728629	0.0237663	-0.0538756	0.039303	-0.306581	0.759171	0.759667	0.924693	0.0126075	0.027765	-0.0418206	0.0670356	0.454079	0.649786	1.03681	0.963689	0.00736357	0.026336	-0.0442632	0.0589904	0.279601	0.779792	0.932829	0.954018
rh_G_front_inf_Orbital	6826	6822	Group[T.IBS]	0.015718	0.0241292	-0.0315828	0.0630187	0.651409	0.514804	0.783045	0.920408	0.0180615	0.0267194	-0.0343169	0.07044	0.67597	0.499082	0.960187	0.963689	0.0349106	0.0270746	-0.018164	0.0879853	1.28942	0.197294	0.985882	0.780152
lh_S_precentral_inf_part	6826	6822	Group[T.IBS]	0.0183388	0.0253153	-0.0312872	0.0679647	0.724413	0.468837	0.861923	0.920408	-0.0254024	0.0260552	-0.0764786	0.0256739	-0.974945	0.329622	0.913038	0.963689	-0.0177362	0.026493	-0.0696707	0.0341984	-0.669466	0.503221	0.943983	0.916026
rh_S_precentral_inf_part	6826	6822	Group[T.IBS]	0.00719772	0.0261436	-0.0440519	0.0584473	0.275315	0.783083	0.919248	0.924693	0.0106537	0.0267682	-0.0418203	0.0631277	0.397999	0.690644	0.963694	0.963689	0.0139988	0.0275154	-0.03994	0.0679376	0.508762	0.610935	1.01825	0.916403
lh_S_precentral_sup_part	6826	6822	Group[T.IBS]	-0.021856	0.026549	-0.0739004	0.0301884	-0.82323	0.410406	0.94798	0.920408	-0.0277827	0.0278013	-0.0822818	0.0267164	-0.999332	0.317669	1.03951	0.963689	-0.0256698	0.0269575	-0.0785149	0.0271752	-0.952234	0.341012	0.977373	0.889596
rh_S_precentral_sup_part	6826	6822	Group[T.IBS]	-0.0217463	0.026538	-0.0737689	0.0302764	-0.81944	0.412564	0.947188	0.920408	-0.0247184	0.0280439	-0.0796931	0.0302564	-0.881418	0.378122	1.05774	0.963689	-0.0320086	0.0276382	-0.0861881	0.022171	-1.15813	0.246853	1.02736	0.787405
lh_G_precentral	6826	6822	Group[T.IBS]	-0.00677214	0.0240134	-0.0538459	0.0403016	-0.282015	0.777941	0.775549	0.924693	-0.0552279	0.0256749	-0.105559	-0.00489712	-2.15105	0.0315074	0.886581	0.630149	-0.0607461	0.026336	-0.112373	-0.00911923	-2.30658	0.0211083	0.93283	0.432734
rh_G_precentral	6826	6822	Group[T.IBS]	0.0112627	0.0251681	-0.0380746	0.0605999	0.447499	0.654529	0.851924	0.924693	-0.0168155	0.0262282	-0.0682309	0.0345998	-0.641126	0.521463	0.925204	0.963689	-0.00267661	0.0274117	-0.056412	0.0510588	-0.0976451	0.922217	1.01058	0.954018
lh_G_postcentral	6826	6822	Group[T.IBS]	0.0323365	0.0276938	-0.021952	0.086625	1.16764	0.242991	1.03149	0.849988	-0.0230353	0.0264101	-0.0748073	0.0287368	-0.872214	0.383122	0.938085	0.963689	-0.00311484	0.0279064	-0.0578202	0.0515905	-0.111617	0.91113	1.04739	0.954018
rh_G_postcentral	6826	6822	Group[T.IBS]	0.0629232	0.0280112	0.00801244	0.117834	2.24636	0.0247131	1.05528	0.464335	-0.0297825	0.0279832	-0.0846383	0.0250733	-1.0643	0.287231	1.05316	0.963689	0.0257672	0.0282062	-0.0295258	0.0810603	0.91353	0.360996	1.07002	0.902491
lh_S_postcentral	6826	6822	Group[T.IBS]	0.033447	0.0254333	-0.0164102	0.0833041	1.31509	0.188525	0.869973	0.849988	-0.00179924	0.0268221	-0.0543789	0.0507804	-0.0670807	0.946519	0.967579	0.983871	0.0141211	0.027124	-0.0390504	0.0672926	0.520612	0.602654	0.989484	0.916403
rh_S_postcentral	6826	6822	Group[T.IBS]	0.0268785	0.0260682	-0.0242233	0.0779802	1.03108	0.302538	0.91395	0.849988	0.0120616	0.0274497	-0.0417485	0.0658716	0.439406	0.660382	1.01339	0.963689	0.0183085	0.0280796	-0.0367363	0.0733533	0.65202	0.51441	1.06043	0.916026
lh_G_and_S_subcentral	6826	6822	Group[T.IBS]	0.016496	0.0233747	-0.0293257	0.0623177	0.705719	0.480387	0.734841	0.920408	-0.0367968	0.0266274	-0.0889947	0.0154011	-1.38192	0.167043	0.95358	0.963689	-0.0343256	0.0272622	-0.0877679	0.0191168	-1.25909	0.20804	0.999591	0.780152
rh_G_and_S_subcentral	6826	6822	Group[T.IBS]	0.016139	0.0230156	-0.0289788	0.0612568	0.701221	0.483189	0.712438	0.920408	-0.00680955	0.0271476	-0.0600273	0.0464082	-0.250835	0.80195	0.991205	0.968981	0.00459865	0.027165	-0.0486532	0.0578505	0.169286	0.865577	0.992477	0.954018
lh_S_central	6826	6822	Group[T.IBS]	-0.0270604	0.0259057	-0.0778437	0.0237229	-1.04457	0.296258	0.902595	0.849988	-0.0731615	0.0275245	-0.127118	-0.0192049	-2.65805	0.00787774	1.01892	0.472664	-0.0634809	0.0277398	-0.11786	-0.00910229	-2.28844	0.0221422	1.03492	0.432734
rh_S_central	6826	6822	Group[T.IBS]	-0.00727121	0.02648	-0.0591803	0.0446379	-0.274592	0.783638	0.943056	0.924693	-0.0591202	0.0273473	-0.112729	-0.00551099	-2.16183	0.0306659	1.00584	0.630149	-0.0426758	0.0277295	-0.0970343	0.0116827	-1.539	0.12385	1.03416	0.780152
lh_G_pariet_inf_Supramar	6826	6822	Group[T.IBS]	-0.00380539	0.0267813	-0.056305	0.0486943	-0.142091	0.887012	0.964637	0.989049	-0.00928858	0.0272762	-0.0627584	0.0441812	-0.340538	0.733462	1.00062	0.968981	-0.0106494	0.0271502	-0.0638721	0.0425734	-0.39224	0.694893	0.991394	0.946467
rh_G_pariet_inf_Supramar	6826	6822	Group[T.IBS]	0.00321783	0.0265246	-0.0487786	0.0552143	0.121315	0.903445	0.946234	0.989049	0.00194057	0.0269702	-0.0509295	0.0548106	0.0719523	0.942642	0.978295	0.983871	0.00350251	0.0271275	-0.0496759	0.0566809	0.129113	0.897272	0.98974	0.954018
lh_G_parietal_sup	6826	6822	Group[T.IBS]	0.016856	0.0255886	-0.0333057	0.0670177	0.658729	0.510092	0.880635	0.920408	0.0109969	0.0273304	-0.0425793	0.0645731	0.402369	0.687425	1.0046	0.963689	0.0220408	0.0266428	-0.0301874	0.074269	0.827269	0.408114	0.954688	0.906919
rh_G_parietal_sup	6826	6822	Group[T.IBS]	0.034414	0.0263952	-0.0173288	0.0861568	1.3038	0.192347	0.937025	0.849988	0.0418668	0.0268903	-0.0108466	0.0945801	1.55695	0.119529	0.972506	0.963689	0.061108	0.0270228	0.00813496	0.114081	2.26135	0.0237688	0.982111	0.432734
lh_S_intrapariet_and_P_trans	6826	6822	Group[T.IBS]	-0.000336757	0.0245337	-0.0484305	0.047757	-0.0137263	0.989049	0.80952	0.989049	-0.0149125	0.0262572	-0.0663848	0.0365598	-0.567939	0.570095	0.927252	0.963689	-0.0183183	0.026731	-0.0707194	0.0340828	-0.685282	0.49319	0.961019	0.916026
rh_S_intrapariet_and_P_trans	6826	6822	Group[T.IBS]	0.0190849	0.0249586	-0.0298418	0.0680116	0.764661	0.4445	0.837806	0.920408	0.0103248	0.0276917	-0.0439596	0.0646093	0.372849	0.709273	1.03134	0.96719	0.0163608	0.0260893	-0.0347824	0.067504	0.627108	0.530609	0.915434	0.916026
lh_G_oc_temp_lat_fusifor	6826	6822	Group[T.IBS]	-0.00685678	0.0233892	-0.052707	0.0389934	-0.29316	0.769409	0.735755	0.924693	0.0180362	0.0274342	-0.0357433	0.0718157	0.657435	0.510923	1.01224	0.963689	0.000616044	0.0274609	-0.0532159	0.054448	0.0224335	0.982103	1.01422	0.982103
rh_G_oc_temp_lat_fusifor	6826	6822	Group[T.IBS]	0.000764784	0.0241789	-0.0466335	0.048163	0.0316302	0.974768	0.786277	0.989049	-0.00785296	0.0274159	-0.0615966	0.0458907	-0.286438	0.774551	1.01089	0.968981	0.00310655	0.0263794	-0.0486052	0.0548183	0.117764	0.906258	0.9359	0.954018
lh_G_temporal_middle	6826	6822	Group[T.IBS]	-0.0496653	0.0227659	-0.0942935	-0.00503703	-2.18157	0.0291756	0.69706	0.464335	0.00196974	0.0276165	-0.0521672	0.0561066	0.0713247	0.943141	1.02574	0.983871	-0.0276222	0.0261443	-0.0788731	0.0236288	-1.05653	0.290765	0.919296	0.830757
rh_G_temporal_middle	6826	6822	Group[T.IBS]	-0.0280622	0.0224533	-0.0720777	0.0159533	-1.2498	0.211415	0.67805	0.849988	-0.0204235	0.0266321	-0.0726307	0.0317837	-0.766875	0.443182	0.953921	0.963689	-0.0297918	0.0267634	-0.0822565	0.0226729	-1.11315	0.265682	0.963353	0.797045
lh_G_and_S_cingul_Ant	6826	6822	Group[T.IBS]	-0.0135163	0.0266211	-0.0657019	0.0386692	-0.507731	0.611658	0.953129	0.924693	0.0324514	0.0268348	-0.0201532	0.085056	1.2093	0.226589	0.968497	0.963689	0.018576	0.0265531	-0.0334763	0.0706283	0.699579	0.484214	0.948268	0.916026
rh_G_and_S_cingul_Ant	6826	6822	Group[T.IBS]	-0.0296146	0.0262058	-0.0809862	0.021757	-1.13008	0.258484	0.923627	0.849988	0.0149704	0.0265349	-0.0370463	0.0669872	0.564178	0.572651	0.946973	0.963689	-0.0110606	0.0269412	-0.0638738	0.0417527	-0.410544	0.68142	0.976195	0.946467
lh_G_and_S_cingul_Mid_Ant	6826	6822	Group[T.IBS]	-0.0276627	0.0258904	-0.0784158	0.0230905	-1.06845	0.285353	0.901524	0.849988	-0.026801	0.0282099	-0.0821012	0.0284993	-0.950053	0.342119	1.0703	0.963689	-0.0323832	0.0276121	-0.0865116	0.0217451	-1.17279	0.24092	1.02542	0.787405
rh_G_and_S_cingul_Mid_Ant	6826	6822	Group[T.IBS]	-0.0337945	0.0221428	-0.0772013	0.00961224	-1.52621	0.127004	0.659426	0.849988	0.0248738	0.0274112	-0.0288607	0.0786083	0.907431	0.364211	1.01055	0.963689	-0.0059184	0.0266839	-0.0582271	0.0463903	-0.221797	0.824479	0.957634	0.954018
lh_G_and_S_cingul_Mid_Post	6826	6822	Group[T.IBS]	-0.0100969	0.0262475	-0.0615502	0.0413564	-0.384681	0.700486	0.926569	0.924693	0.00738697	0.0261848	-0.0439434	0.0587173	0.282109	0.777868	0.922146	0.968981	-0.000930155	0.027522	-0.0548819	0.0530216	-0.0337968	0.97304	1.01874	0.982103
rh_G_and_S_cingul_Mid_Post	6826	6822	Group[T.IBS]	-0.00800883	0.026182	-0.0593338	0.0433162	-0.30589	0.759698	0.921953	0.924693	-0.0388665	0.0276021	-0.0929752	0.0152423	-1.4081	0.159148	1.02467	0.963689	-0.0431599	0.0271792	-0.0964397	0.0101199	-1.58797	0.112339	0.993518	0.780152
lh_G_cingul_Post_dorsal	6826	6822	Group[T.IBS]	-0.0355671	0.0232838	-0.0812106	0.0100763	-1.52755	0.126671	0.729135	0.849988	0.0397653	0.0260914	-0.011382	0.0909127	1.52408	0.127536	0.915581	0.963689	0.0361789	0.0273257	-0.0173879	0.0897458	1.32399	0.185551	1.00425	0.780152
rh_G_cingul_Post_dorsal	6826	6822	Group[T.IBS]	-0.0153308	0.0262017	-0.0666942	0.0360326	-0.585107	0.558495	0.923334	0.924693	-0.00306776	0.0253857	-0.0528316	0.0466961	-0.120846	0.903817	0.86672	0.983871	-0.0104365	0.0280496	-0.0654223	0.0445494	-0.372073	0.70985	1.05816	0.946467
lh_G_cingul_Post_ventral	6826	6822	Group[T.IBS]	0.0326619	0.0257225	-0.0177621	0.083086	1.26978	0.204206	0.889869	0.849988	0.0487801	0.0259309	-0.00205259	0.0996129	1.88116	0.0599933	0.904353	0.899899	0.0576468	0.0263708	0.00595178	0.109342	2.18601	0.0288489	0.935293	0.432734
rh_G_cingul_Post_ventral	6826	6822	Group[T.IBS]	0.0320088	0.0248852	-0.016774	0.0807916	1.28626	0.198397	0.832883	0.849988	0.0249536	0.0262717	-0.0265471	0.0764544	0.949829	0.342233	0.928278	0.963689	0.0347598	0.0267619	-0.0177019	0.0872216	1.29885	0.194038	0.963244	0.780152
lh_S_orbital_med_olfact	6826	6822	Group[T.IBS]	-0.0574065	0.0266834	-0.109714	-0.00509866	-2.15139	0.0314803	0.957602	0.464335	-0.00152183	0.0248019	-0.0501413	0.0470976	-0.0613593	0.951075	0.827316	0.983871	-0.0148462	0.0272359	-0.068237	0.0385447	-0.545096	0.585705	0.997664	0.916403
rh_S_orbital_med_olfact	6826	6822	Group[T.IBS]	-0.00760752	0.0272281	-0.0609831	0.0457681	-0.279399	0.779947	0.997096	0.924693	-0.013838	0.0277402	-0.0682175	0.0405414	-0.498844	0.617905	1.03495	0.963689	-0.0083389	0.0277621	-0.0627613	0.0460835	-0.300369	0.763905	1.03659	0.954018
lh_G_orbital	6826	6822	Group[T.IBS]	-0.00906409	0.0267192	-0.0614421	0.0433139	-0.339235	0.734443	0.96017	0.924693	0.044431	0.0256765	-0.00590298	0.094765	1.73041	0.0836016	0.886693	0.963689	0.0352908	0.02685	-0.0173436	0.0879252	1.31437	0.188767	0.969597	0.780152
rh_G_orbital	6826	6822	Group[T.IBS]	0.0327499	0.0234944	-0.0133064	0.0788061	1.39395	0.163379	0.742384	0.849988	0.0238259	0.0268789	-0.028865	0.0765169	0.886419	0.375423	0.971679	0.963689	0.0449922	0.0275179	-0.00895151	0.0989358	1.63501	0.102092	1.01843	0.780152
lh_G_rectus	6826	6822	Group[T.IBS]	-0.0391728	0.0228987	-0.0840615	0.00571579	-1.7107	0.087182	0.705218	0.849988	0.00788321	0.0247056	-0.0405474	0.0563138	0.319087	0.749671	0.820901	0.968981	-0.0135456	0.0265792	-0.0656492	0.0385579	-0.509632	0.610326	0.950137	0.916403
rh_G_rectus	6826	6822	Group[T.IBS]	-0.0168694	0.0233082	-0.0625607	0.028822	-0.723752	0.469243	0.730667	0.920408	-0.0059337	0.0243502	-0.0536676	0.0418002	-0.243682	0.807484	0.797453	0.968981	-0.0238119	0.0270754	-0.076888	0.0292642	-0.879467	0.379179	0.985938	0.906919
lh_S_circular_insula_ant	6826	6822	Group[T.IBS]	-0.00811562	0.0226978	-0.0526104	0.0363792	-0.357551	0.720691	0.692897	0.924693	0.0110103	0.0243621	-0.0367471	0.0587677	0.451944	0.651324	0.798237	0.963689	0.0165536	0.0259	-0.0342185	0.0673257	0.639136	0.522756	0.902198	0.916026
rh_S_circular_insula_ant	6826	6822	Group[T.IBS]	0.0121587	0.0236539	-0.0342103	0.0585276	0.514025	0.607251	0.752498	0.924693	-0.00418478	0.0247674	-0.0527366	0.0443671	-0.168963	0.865831	0.825016	0.983871	0.00767343	0.0266872	-0.0446417	0.0599886	0.287532	0.773713	0.95787	0.954018
lh_S_circular_insula_inf	6826	6822	Group[T.IBS]	-0.0598165	0.0230915	-0.105083	-0.0145499	-2.59041	0.00960654	0.717142	0.464335	0.00214826	0.0244195	-0.0457216	0.0500181	0.087973	0.929901	0.802001	0.983871	-0.0357903	0.0279727	-0.0906255	0.019045	-1.27947	0.200775	1.05238	0.780152
rh_S_circular_insula_inf	6826	6822	Group[T.IBS]	-0.000450805	0.0233421	-0.0462087	0.0453071	-0.0193129	0.984592	0.732796	0.989049	0.0163153	0.0257487	-0.0341603	0.0667908	0.633634	0.526341	0.891687	0.963689	0.00787899	0.026909	-0.0448711	0.0606291	0.292801	0.769683	0.973861	0.954018
lh_G_cuneus	6826	6822	Group[T.IBS]	0.0497006	0.0267847	-0.00280573	0.102207	1.85556	0.0635593	0.964882	0.75	-0.0145456	0.0270399	-0.0675522	0.038461	-0.537931	0.590642	0.983358	0.963689	0.0268628	0.0276277	-0.0272962	0.0810217	0.972312	0.33093	1.02658	0.889596
rh_G_cuneus	6826	6822	Group[T.IBS]	-	-	-	-	-	-	-	-	-0.0127718	0.0267677	-0.0652448	0.0397013	-0.477134	0.633282	0.963659	0.963689	0.0381138	0.0274441	-0.0156851	0.0919127	1.38878	0.164944	1.01297	0.780152
lh_Lat_Fis_post	6826	6822	Group[T.IBS]	0.023166	0.026612	-0.0290018	0.0753338	0.870511	0.384052	0.95248	0.920408	0.020275	0.0271041	-0.0328575	0.0734076	0.748042	0.45446	0.988036	0.963689	0.0495464	0.0265562	-0.00251192	0.101605	1.86572	0.0621231	0.948489	0.745477
rh_Lat_Fis_post	6826	6822	Group[T.IBS]	0.0299095	0.0270922	-0.0231997	0.0830187	1.10399	0.269637	0.987167	0.849988	0.0253785	0.0258392	-0.0252743	0.0760314	0.982172	0.32605	0.897964	0.963689	0.0314547	0.0273034	-0.0220686	0.0849779	1.15204	0.249345	1.00262	0.787405

## Sheet: S-T8
Supplementary Table 8. Equivalence test for fixed effects of group
ROI	Cortical Thickness							Surface Area							Cortival Volume
	beta	ci_lo	ci_hi	p_lower	p_upper	p_max	p_max_fdr	beta	ci_lo	ci_hi	p_lower	p_upper	p_max	p_max_fdr	beta	ci_lo	ci_hi	p_lower	p_upper	p_max	p_max_fdr
lh_S_front_sup	0.0145208	-0.0258621	0.0549038	1.49934e-05	0.00138476	0.00138476	0.00340421	0.00423227	-0.0390058	0.0474704	0.000226215	0.000721761	0.000721761	0.0039585	0.0279953	-0.0150118	0.0710024	6.06928e-07	0.00331191	0.00331191	0.00462127
rh_S_front_sup	-0.0290518	-0.0697129	0.0116093	0.00855453	1.11352e-06	0.00855453	0.0123102	0.0188478	-0.0245164	0.062212	2.55191e-05	0.00436281	0.00436281	0.00832207	-0.00354263	-0.0465869	0.0395016	0.000133019	4.48928e-05	0.000133019	0.000921014
lh_G_front_sup	-0.0031292	-0.0398582	0.0335998	7.25891e-05	2.26151e-05	7.25891e-05	0.0019257	-0.000237143	-0.0456354	0.0451611	0.000739094	0.000696498	0.000739094	0.0039585	0.020406	-0.0242271	0.0650391	5.46869e-06	0.00189095	0.00189095	0.00306641
rh_G_front_sup	-0.00772426	-0.0449117	0.0294632	0.000193036	1.15984e-05	0.000193036	0.0019257	0.000584288	-0.0436843	0.0448529	0.000500087	0.000582928	0.000582928	0.0039585	0.0275032	-0.0162284	0.0712349	9.94092e-07	0.00358632	0.00358632	0.00485925
lh_S_front_inf	0.0023235	-0.0396226	0.0442696	0.000199593	0.000391668	0.000391668	0.0019257	-0.0205686	-0.063407	0.0222698	0.00481605	1.54699e-05	0.00481605	0.0084989	-0.00421494	-0.0494398	0.0410099	0.000284232	8.75664e-05	0.000284232	0.000921014
rh_S_front_inf	0.00194011	-0.0396119	0.0434921	0.000186122	0.000330085	0.000330085	0.0019257	0.0289845	-0.0146446	0.0726136	5.22346e-06	0.0130489	0.0130489	0.0166582	-0.0240288	-0.0678945	0.019837	0.00247174	2.01208e-06	0.00247174	0.00380267
lh_G_front_middle	-0.0113059	-0.0541469	0.0315351	0.0016201	6.91637e-05	0.0016201	0.00341378	-0.0166415	-0.0618107	0.0285276	0.00468621	6.97887e-05	0.00468621	0.0084989	0.0260229	-0.0187036	0.0707494	2.16671e-06	0.00364443	0.00364443	0.00485925
rh_G_front_middle	0.0199149	-0.0219818	0.0618115	1.14605e-05	0.0037636	0.0037636	0.00624065	-0.0242377	-0.069409	0.0209337	0.0101275	2.20494e-05	0.0101275	0.0138103	-0.0173648	-0.061994	0.0272644	0.00131466	9.08462e-06	0.00131466	0.00252981
lh_S_front_middle	-0.0170434	-0.0588166	0.0247298	0.00260743	1.78261e-05	0.00260743	0.00512695	0.0221834	-0.0219947	0.0663614	2.06335e-05	0.00713855	0.00713855	0.0109824	-0.000935521	-0.0472588	0.0453878	0.000249878	0.000194644	0.000249878	0.000921014
rh_S_front_middle	-0.000528696	-0.0418451	0.0407877	0.000249646	0.000213202	0.000249646	0.0019257	0.0121979	-0.0336189	0.0580146	0.000161684	0.00325542	0.00325542	0.00689317	-0.0303156	-0.0756831	0.0150518	0.00638865	1.3985e-06	0.00638865	0.00766638
lh_G_front_inf_Orbital	-0.00728629	-0.0463836	0.031811	0.000343661	3.07731e-05	0.000343661	0.0019257	0.0126075	-0.0330681	0.0582831	0.000146359	0.00331836	0.00331836	0.00689317	-0.0065383	-0.0498631	0.0367865	0.000224786	3.10256e-05	0.000224786	0.000921014
rh_G_front_inf_Orbital	0.015718	-0.0239764	0.0554123	8.71971e-06	0.00137433	0.00137433	0.00340421	0.0180615	-0.025894	0.0620171	3.63886e-05	0.00443844	0.00443844	0.00832207	-0.0116651	-0.0562048	0.0328747	0.000631252	2.20605e-05	0.000631252	0.00144227
lh_S_precentral_inf_part	0.0183388	-0.0233069	0.0599844	1.34818e-05	0.00297179	0.00297179	0.00515693	-0.0254024	-0.0682651	0.0174604	0.00815488	6.83115e-06	0.00815488	0.0117368	0.0194879	-0.0240952	0.0630709	3.92963e-06	0.00134923	0.00134923	0.00252981
rh_S_precentral_inf_part	0.00719772	-0.0358105	0.050206	0.000136618	0.00100242	0.00100242	0.00309399	0.0106537	-0.033382	0.0546894	0.00011502	0.00193544	0.00193544	0.00652903	-0.0448194	-0.0900843	0.000445569	0.0244909	8.87608e-08	0.0244909	0.0272121
lh_S_precentral_sup_part	-0.021856	-0.0655312	0.0218192	0.00637402	1.77396e-05	0.00637402	0.0098965	-0.0277827	-0.0735179	0.0179525	0.0151732	1.57833e-05	0.0151732	0.0185794	0.000479197	-0.0438679	0.0448263	0.000112901	0.000129722	0.000129722	0.000921014
rh_S_precentral_sup_part	-0.0217463	-0.0654032	0.0219107	0.00628184	1.79259e-05	0.00628184	0.0098965	-0.0247184	-0.0708527	0.0214159	0.0120348	2.94926e-05	0.0120348	0.0156975	0.0262777	-0.0191893	0.0717447	2.96042e-06	0.00426349	0.00426349	0.00556107
lh_G_precentral	-0.00677214	-0.0462761	0.0327318	0.000361031	4.00269e-05	0.000361031	0.0019257	-0.0552279	-0.097465	-0.0129907	0.100924	1.25936e-08	0.100924	0.104404	0.0617661	0.0184413	0.105091	5.44183e-10	0.0787333	0.0787333	0.0787333
rh_G_precentral	0.0112627	-0.0301407	0.0526661	4.04691e-05	0.00115244	0.00115244	0.00309399	-0.0168155	-0.0599629	0.0263318	0.0033317	3.25093e-05	0.0033317	0.00689317	0.04486	-0.000234316	0.0899542	7.91416e-08	0.02415	0.02415	0.0272121
lh_G_postcentral	0.0323365	-0.0132219	0.0778949	7.05673e-06	0.0222372	0.0222372	0.0242962	-0.0230353	-0.066482	0.0204114	0.00696222	1.32637e-05	0.00696222	0.0109824	0.0544234	0.00851518	0.100332	1.99265e-08	0.0551162	0.0551162	0.0570167
rh_G_postcentral	0.0629232	0.0168426	0.109004	3.68242e-08	0.185345	0.185345	0.185345	-0.0297825	-0.075817	0.016252	0.018761	1.29873e-05	0.018761	0.0225132	0.0204158	-0.0259856	0.0668173	1.16464e-05	0.00267505	0.00267505	0.00401257
lh_S_postcentral	0.033447	-0.0083927	0.0752867	9.16723e-07	0.0159961	0.0159961	0.018541	-0.00179924	-0.0459236	0.0423251	0.000658006	0.000409248	0.000658006	0.0039585	-0.0090195	-0.0536406	0.0356016	0.000456714	3.44612e-05	0.000456714	0.00119143
rh_S_postcentral	0.0268785	-0.0160057	0.0697626	5.32454e-06	0.00953593	0.00953593	0.0127868	0.0120616	-0.0330953	0.0572185	0.000134551	0.00284109	0.00284109	0.00689317	-0.00238153	-0.0485746	0.0438116	0.000291654	0.000153898	0.000291654	0.000921014
lh_G_and_S_subcentral	0.016496	-0.0219572	0.0549491	3.96543e-06	0.00111456	0.00111456	0.00309399	-0.0367968	-0.0806008	0.00700728	0.0272636	1.41456e-06	0.0272636	0.031458	0.0495938	0.00474541	0.0944421	2.59859e-08	0.0349947	0.0349947	0.0381761
rh_G_and_S_subcentral	0.016139	-0.0217234	0.0540015	3.07514e-06	0.000901068	0.000901068	0.00309399	-0.00680955	-0.0514694	0.0378503	0.00139663	0.000240888	0.00139663	0.00558652	-0.0028493	-0.0475378	0.0418392	0.000201773	8.94033e-05	0.000201773	0.000921014
lh_S_central	-0.0270604	-0.0696773	0.0155565	0.00934145	4.5371e-06	0.00934145	0.0127868	-0.0731615	-0.118441	-0.0278816	0.294917	2.49277e-09	0.294917	0.294917	0.0562388	0.0106047	0.101873	1.13772e-08	0.0616195	0.0616195	0.0626639
rh_S_central	-0.00727121	-0.0508329	0.0362904	0.00115369	0.000161563	0.00115369	0.00309399	-0.0591202	-0.104109	-0.0141318	0.145494	3.85452e-08	0.145494	0.14796	0.0516221	0.00600487	0.0972392	2.8852e-08	0.0437876	0.0437876	0.0460922
lh_G_pariet_inf_Supramar	-0.00380539	-0.0478627	0.0402519	0.000837463	0.000305855	0.000837463	0.00309399	-0.00928858	-0.05416	0.0355828	0.00195871	0.000181924	0.00195871	0.00652903	-0.00890349	-0.0535676	0.0357606	0.00045496	3.56539e-05	0.00045496	0.00119143
rh_G_pariet_inf_Supramar	0.00321783	-0.0404172	0.0468528	0.000293689	0.000699036	0.000699036	0.00294594	0.00194057	-0.0424275	0.0463086	0.000429063	0.000712348	0.000712348	0.0039585	-0.0192566	-0.0638835	0.0253702	0.00164882	6.62005e-06	0.00164882	0.00282655
lh_G_parietal_sup	0.016856	-0.0252393	0.0589513	2.11006e-05	0.00272291	0.00272291	0.00512695	0.0109969	-0.0339637	0.0559576	0.000147102	0.00242703	0.00242703	0.00689317	-0.010942	-0.0547715	0.0328875	0.000477108	1.86342e-05	0.000477108	0.00119277
rh_G_parietal_sup	0.034414	-0.00900814	0.0778361	1.79405e-06	0.0211904	0.0211904	0.0235893	0.0418668	-0.0023698	0.0861034	6.99284e-07	0.0431395	0.0431395	0.0470613	-0.0252304	-0.069685	0.0192241	0.00317576	2.17905e-06	0.00317576	0.0045368
lh_S_intrapariet_and_P_trans	-0.000336757	-0.0406966	0.0400231	0.000177556	0.000159852	0.000177556	0.0019257	-0.0149125	-0.0581076	0.0282826	0.002696	4.48187e-05	0.002696	0.00689317	-0.0201383	-0.0641128	0.0238363	0.00159325	4.22347e-06	0.00159325	0.00281728
rh_S_intrapariet_and_P_trans	0.0190849	-0.021974	0.0601438	9.03694e-06	0.00288743	0.00288743	0.00515693	0.0103248	-0.0352302	0.0558799	0.000193405	0.00252299	0.00252299	0.00689317	-0.0452453	-0.0881642	-0.00232632	0.0196985	1.67086e-08	0.0196985	0.022729
lh_G_oc_temp_lat_fusifor	-0.00685678	-0.0453339	0.0316203	0.000262565	2.52841e-05	0.000262565	0.0019257	0.0180362	-0.0270951	0.0631675	5.60334e-05	0.00539319	0.00539319	0.00924547	-0.0272649	-0.0724403	0.0179104	0.00450714	2.17143e-06	0.00450714	0.0057538
rh_G_oc_temp_lat_fusifor	0.000764784	-0.0390114	0.040541	0.000121647	0.000155446	0.000155446	0.0019257	-0.00785296	-0.0529542	0.0372483	0.00173696	0.000237418	0.00173696	0.00651359	-0.0324015	-0.0757975	0.0109946	0.00580198	3.23686e-07	0.00580198	0.00725248
lh_G_temporal_middle	-0.0496653	-0.0871169	-0.0122136	0.0461264	7.76812e-10	0.0461264	0.0494811	0.00196974	-0.0434615	0.047401	0.000564087	0.000922979	0.000922979	0.0042599	0.0252018	-0.0178075	0.0682112	1.03467e-06	0.00238777	0.00238777	0.00377016
rh_G_temporal_middle	-0.0280622	-0.0649996	0.00887522	0.00380785	1.20988e-07	0.00380785	0.00624065	-0.0204235	-0.0642354	0.0233884	0.00559489	2.36545e-05	0.00559489	0.00932482	0.00667653	-0.0373514	0.0507045	3.97104e-05	0.000282397	0.000282397	0.000921014
lh_G_and_S_cingul_Ant	-0.0135163	-0.05731	0.0302773	0.00257883	6.91424e-05	0.00257883	0.00512695	0.0324514	-0.011694	0.0765967	3.64312e-06	0.019244	0.019244	0.02264	-0.000130162	-0.043812	0.0435517	9.90396e-05	9.5269e-05	9.90396e-05	0.000921014
rh_G_and_S_cingul_Ant	-0.0296146	-0.0727252	0.013496	0.012958	3.65189e-06	0.012958	0.0159275	0.0149704	-0.0286816	0.0586224	5.25987e-05	0.0029676	0.0029676	0.00689317	0.00504683	-0.0392736	0.0493672	5.67535e-05	0.000245466	0.000245466	0.000921014
lh_G_and_S_cingul_Mid_Ant	-0.0276627	-0.0702543	0.014929	0.00990451	4.02259e-06	0.00990451	0.0129859	-0.026801	-0.0732085	0.0196066	0.0150428	2.38208e-05	0.0150428	0.0185794	-0.0185792	-0.0640032	0.0268449	0.00179843	1.044e-05	0.00179843	0.00299738
rh_G_and_S_cingul_Mid_Ant	-0.0337945	-0.0702211	0.00263206	0.00719515	1.9632e-08	0.00719515	0.010885	0.0248738	-0.0202198	0.0699673	1.93512e-05	0.0106562	0.0106562	0.0142083	0.00224414	-0.0416529	0.0461412	7.46991e-05	0.00014497	0.00014497	0.000921014
lh_G_and_S_cingul_Mid_Post	-0.0100969	-0.0532761	0.0330822	0.00150384	9.37336e-05	0.00150384	0.00341378	0.00738697	-0.035689	0.050463	0.000135824	0.00104394	0.00104394	0.00447401	-0.0104411	-0.0557169	0.0348348	0.000649023	3.53312e-05	0.000649023	0.00144227
rh_G_and_S_cingul_Mid_Post	-0.00800883	-0.0510803	0.0350627	0.00112893	0.000123654	0.00112893	0.00309399	-0.0388665	-0.0842741	0.00654113	0.037555	2.18943e-06	0.037555	0.0417277	0.0307703	-0.0139416	0.0754823	9.19047e-07	0.00604188	0.00604188	0.00739823
lh_G_cingul_Post_dorsal	-0.0355671	-0.0738707	0.00273646	0.0121799	5.74751e-08	0.0121799	0.0153664	0.0397653	-0.00315705	0.0826877	4.9817e-07	0.0322737	0.0322737	0.0365363	0.00430222	-0.0406507	0.0492551	7.89546e-05	0.000266231	0.000266231	0.000921014
rh_G_cingul_Post_dorsal	-0.0153308	-0.0584345	0.027773	0.00278072	4.05232e-05	0.00278072	0.00512695	-0.00306776	-0.0448291	0.0386936	0.000412627	0.000168186	0.000412627	0.0039585	0.021608	-0.0245357	0.0677517	8.66594e-06	0.00290561	0.00290561	0.00425212
lh_G_cingul_Post_ventral	0.0326619	-0.0096535	0.0749773	1.3864e-06	0.0157417	0.0157417	0.018541	0.0487801	0.00612174	0.0914385	6.85005e-08	0.06523	0.06523	0.0686631	-0.00961598	-0.052998	0.033766	0.000352075	1.92676e-05	0.000352075	0.00100593
rh_G_cingul_Post_ventral	0.0320088	-0.00892928	0.0729469	7.24237e-07	0.012241	0.012241	0.0153664	0.0249536	-0.0182653	0.0681726	8.68072e-06	0.00821575	0.00821575	0.0117368	0.00568776	-0.0383377	0.0497132	4.62472e-05	0.000246002	0.000246002	0.000921014
lh_S_orbital_med_olfact	-0.0574065	-0.101303	-0.0135102	0.125807	2.61657e-08	0.125807	0.127976	-0.00152183	-0.0423229	0.0392792	0.000245999	0.000154509	0.000245999	0.0039585	-0.0107832	-0.0555883	0.0340219	0.000602639	2.80926e-05	0.000602639	0.00144227
rh_S_orbital_med_olfact	-0.00760752	-0.0523999	0.0371848	0.00158116	0.000224358	0.00158116	0.00341378	-0.013838	-0.0594728	0.0317967	0.00376275	0.00012166	0.00376275	0.0075255	-0.0147894	-0.0604602	0.0308815	0.00121406	2.10125e-05	0.00121406	0.00242812
lh_G_orbital	-0.00906409	-0.0530192	0.034891	0.00157237	0.00014124	0.00157237	0.00341378	0.044431	0.00219115	0.0866708	1.28543e-07	0.044886	0.044886	0.0480921	0.00499919	-0.0391712	0.0491696	5.41801e-05	0.000233278	0.000233278	0.000921014
rh_G_orbital	0.0327499	-0.00590014	0.0713999	1.41541e-07	0.00935972	0.00935972	0.0127868	0.0238259	-0.0203919	0.0680437	1.60819e-05	0.00849454	0.00849454	0.0118528	-0.0048986	-0.0501677	0.0403705	0.000315354	8.04661e-05	0.000315354	0.000946063
lh_G_rectus	-0.0391728	-0.076843	-0.00150268	0.0165085	1.45103e-08	0.0165085	0.0187308	0.00788321	-0.0327593	0.0485258	5.24959e-05	0.000594517	0.000594517	0.0039585	0.00193204	-0.0417928	0.0456569	7.37446e-05	0.000131066	0.000131066	0.000921014
rh_G_rectus	-0.0168694	-0.0552132	0.0214745	0.00114197	3.46632e-06	0.00114197	0.00309399	-0.0059337	-0.0459916	0.0341242	0.000377574	5.77753e-05	0.000377574	0.0039585	-0.0191392	-0.0636802	0.0254019	0.00159646	6.49871e-06	0.00159646	0.00281728
lh_S_circular_insula_ant	-0.00811562	-0.0454552	0.029224	0.000217609	1.15994e-05	0.000217609	0.0019257	0.0110103	-0.0290673	0.0510879	2.43791e-05	0.0007917	0.0007917	0.0039585	-0.0051481	-0.0477556	0.0374594	0.00014631	2.92685e-05	0.00014631	0.000921014
rh_S_circular_insula_ant	0.0121587	-0.0267537	0.0510711	1.16113e-05	0.000675375	0.000675375	0.00294594	-0.00418478	-0.0449291	0.0365595	0.00035908	9.96129e-05	0.00035908	0.0039585	-0.000373515	-0.044276	0.0435289	0.000110521	9.89753e-05	0.000110521	0.000921014
lh_S_circular_insula_inf	-0.0598165	-0.0978037	-0.0218292	0.111156	8.21211e-11	0.111156	0.115056	0.00214826	-0.0380237	0.0423202	0.000112271	0.00022072	0.00022072	0.0039585	0.0121751	-0.0338422	0.0581923	3.56406e-05	0.000958799	0.000958799	0.00198372
rh_S_circular_insula_inf	-0.000450805	-0.0388504	0.0379488	8.89039e-05	7.6181e-05	8.89039e-05	0.0019257	0.0163153	-0.0260434	0.0586739	2.57517e-05	0.00269194	0.00269194	0.00689317	-0.00592759	-0.050195	0.0383398	0.00027297	4.8689e-05	0.00027297	0.000921014
lh_G_cuneus	0.0497006	0.00563773	0.0937634	1.40425e-07	0.0763957	0.0763957	0.0804883	-0.0145456	-0.0590283	0.0299371	0.00330693	7.52492e-05	0.00330693	0.00689317	0.0356932	-0.00975656	0.0811429	5.55528e-07	0.0109846	0.0109846	0.0129231
rh_G_cuneus	-	-	-	-	-	-	-	-0.0127718	-0.0568067	0.0312631	0.00248097	8.40822e-05	0.00248097	0.00689317	0.0129884	-0.0321591	0.058136	2.2715e-05	0.000865657	0.000865657	0.00185498
lh_Lat_Fis_post	0.023166	-0.0206127	0.0669448	1.4934e-05	0.00743252	0.00743252	0.010963	0.020275	-0.0243134	0.0648634	3.27178e-05	0.00624426	0.00624426	0.0101258	-0.053575	-0.0972619	-0.00988804	0.043607	4.78363e-09	0.043607	0.0460922
rh_Lat_Fis_post	0.0299095	-0.0146593	0.0744783	6.83868e-06	0.016027	0.016027	0.018541	0.0253785	-0.0171289	0.067886	5.80994e-06	0.00769864	0.00769864	0.011548	-0.00167027	-0.0465865	0.043246	0.000183352	0.000114296	0.000183352	0.000921014

## Sheet: S-T9
Supplementary Table 9. Parameter estimates for fixed effect of group × sex
ROI	N	df	term	Cortical Thickness								Surface Area								Cortical Volume
				beta	se	ci_lower	ci_upper	t	p	Residual_var	p_fdr_bh	beta	se	ci_lower	ci_upper	t	p	Residual_var	p_fdr_bh	beta	se	ci_lower	ci_upper	t	p	Residual_var	p_fdr_bh
lh_S_front_sup	6826	6822	Group[T.IBS]:C(sex, Sum)[S.Female]	-0.0188789	0.0245477	-0.0670002	0.0292423	-0.76907	0.441878	0.810447	0.991752	0.0324315	0.0262833	-0.019092	0.083955	1.23392	0.217275	0.929098	0.988928	0.0279953	0.0261429	-0.023253	0.0792436	1.07086	0.284272	0.919199	0.996089
rh_S_front_sup	6826	6822	Group[T.IBS]:C(sex, Sum)[S.Female]	-0.0191032	0.0247169	-0.0675559	0.0293496	-0.772881	0.43962	0.821652	0.991752	0.0036107	0.02636	-0.0480631	0.0552845	0.136977	0.891053	0.934527	0.988928	-0.00354263	0.0261655	-0.0548352	0.0477499	-0.135393	0.892305	0.920787	0.996089
lh_G_front_sup	6826	6822	Group[T.IBS]:C(sex, Sum)[S.Female]	0.00532937	0.0223266	-0.0384378	0.0490965	0.2387	0.811345	0.670421	0.991752	0.01424	0.0275964	-0.0398576	0.0683376	0.516009	0.605865	1.02425	0.988928	0.020406	0.0271313	-0.0327798	0.0735919	0.752121	0.452004	0.990018	0.996089
rh_G_front_sup	6826	6822	Group[T.IBS]:C(sex, Sum)[S.Female]	0.00240379	0.0226053	-0.0419096	0.0467172	0.106338	0.915318	0.68726	0.991752	0.0188276	0.0269097	-0.0339239	0.0715791	0.699658	0.484165	0.973913	0.988928	0.0275032	0.0265834	-0.0246084	0.0796149	1.0346	0.300891	0.950432	0.996089
lh_S_front_inf	6826	6822	Group[T.IBS]:C(sex, Sum)[S.Female]	0.0379007	0.025498	-0.0120833	0.0878847	1.48642	0.137215	0.874406	0.991752	-0.0244448	0.0260404	-0.075492	0.0266025	-0.938727	0.347904	0.912002	0.988928	-0.00421494	0.027491	-0.0581059	0.049676	-0.153321	0.87815	1.01644	0.996089
rh_S_front_inf	6826	6822	Group[T.IBS]:C(sex, Sum)[S.Female]	0.00604526	0.0252584	-0.0434691	0.0555596	0.239337	0.810852	0.85805	0.991752	-0.0187967	0.026521	-0.0707861	0.0331928	-0.708747	0.478506	0.945979	0.988928	-0.0240288	0.0266649	-0.0763002	0.0282426	-0.901141	0.367545	0.956268	0.996089
lh_G_front_middle	6826	6822	Group[T.IBS]:C(sex, Sum)[S.Female]	0.000818016	0.0260419	-0.0502323	0.0518683	0.0314115	0.974942	0.91211	0.991752	0.0363765	0.0274572	-0.0174481	0.0902011	1.32484	0.185267	1.01394	0.988928	0.0260229	0.0271881	-0.0272743	0.07932	0.957142	0.338529	0.994167	0.996089
rh_G_front_middle	6826	6822	Group[T.IBS]:C(sex, Sum)[S.Female]	-0.0157484	0.0254679	-0.0656734	0.0341766	-0.618362	0.536357	0.872343	0.991752	-0.0175223	0.0274585	-0.0713495	0.036305	-0.638136	0.523407	1.01404	0.988928	-0.0173648	0.0271289	-0.070546	0.0358164	-0.640083	0.52214	0.989845	0.996089
lh_S_front_middle	6826	6822	Group[T.IBS]:C(sex, Sum)[S.Female]	0.00286827	0.0253928	-0.0469096	0.0526462	0.112956	0.910069	0.86721	0.991752	0.00135318	0.0268547	-0.0512904	0.0539967	0.0503889	0.959814	0.969933	0.988928	-0.000935521	0.0281587	-0.0561354	0.0542644	-0.0332231	0.973498	1.06642	0.996089
rh_S_front_middle	6826	6822	Group[T.IBS]:C(sex, Sum)[S.Female]	-0.0237627	0.0251152	-0.0729963	0.0254708	-0.946151	0.344105	0.848346	0.991752	-0.021183	0.0278508	-0.0757793	0.0334133	-0.760587	0.44693	1.04323	0.988928	-0.0303156	0.0275777	-0.0843766	0.0237453	-1.09928	0.271685	1.02286	0.996089
lh_G_front_inf_Orbital	6826	6822	Group[T.IBS]:C(sex, Sum)[S.Female]	0.0204231	0.0237663	-0.0261662	0.0670124	0.859332	0.390187	0.759667	0.991752	-0.0083117	0.027765	-0.0627398	0.0461164	-0.299359	0.764676	1.03681	0.988928	-0.0065383	0.026336	-0.0581651	0.0450885	-0.248265	0.803937	0.932829	0.996089
rh_G_front_inf_Orbital	6826	6822	Group[T.IBS]:C(sex, Sum)[S.Female]	0.00181313	0.0241292	-0.0454876	0.0491139	0.0751424	0.940104	0.783045	0.991752	0.000922943	0.0267194	-0.0514555	0.0533014	0.034542	0.972446	0.960187	0.988928	-0.0116651	0.0270746	-0.0647397	0.0414095	-0.43085	0.666591	0.985882	0.996089
lh_S_precentral_inf_part	6826	6822	Group[T.IBS]:C(sex, Sum)[S.Female]	-0.000176861	0.0253153	-0.0498028	0.0494491	-0.00698634	0.994426	0.861923	0.994426	0.0211129	0.0260552	-0.0299633	0.0721892	0.810317	0.417786	0.913038	0.988928	0.0194879	0.026493	-0.0324467	0.0714224	0.735585	0.462009	0.943983	0.996089
rh_S_precentral_inf_part	6826	6822	Group[T.IBS]:C(sex, Sum)[S.Female]	-0.0241195	0.0261436	-0.0753692	0.0271301	-0.922579	0.356259	0.919248	0.991752	-0.0433065	0.0267682	-0.0957805	0.00916748	-1.61784	0.105744	0.963694	0.988928	-0.0448194	0.0275154	-0.0987581	0.00911938	-1.62888	0.103384	1.01825	0.689226
lh_S_precentral_sup_part	6826	6822	Group[T.IBS]:C(sex, Sum)[S.Female]	0.0200864	0.026549	-0.031958	0.0721308	0.756577	0.449329	0.94798	0.991752	-0.00131699	0.0278013	-0.0558161	0.0531822	-0.0473717	0.962218	1.03951	0.988928	0.000479197	0.0269575	-0.0523659	0.0533243	0.017776	0.985818	0.977373	0.996089
rh_S_precentral_sup_part	6826	6822	Group[T.IBS]:C(sex, Sum)[S.Female]	0.00488757	0.026538	-0.0471351	0.0569102	0.184173	0.853883	0.947188	0.991752	0.0332717	0.0280439	-0.0217031	0.0882464	1.18641	0.2355	1.05774	0.988928	0.0262777	0.0276382	-0.0279018	0.0804572	0.950774	0.341753	1.02736	0.996089
lh_G_precentral	6826	6822	Group[T.IBS]:C(sex, Sum)[S.Female]	0.0323205	0.0240134	-0.0147533	0.0793943	1.34594	0.178368	0.775549	0.991752	0.0288409	0.0256749	-0.0214899	0.0791716	1.12331	0.261345	0.886581	0.988928	0.0617661	0.026336	0.0101393	0.113393	2.34531	0.0190398	0.93283	0.689226
rh_G_precentral	6826	6822	Group[T.IBS]:C(sex, Sum)[S.Female]	0.0187153	0.0251681	-0.0306219	0.0680526	0.743614	0.457136	0.851924	0.991752	0.0215443	0.0262282	-0.0298711	0.0729597	0.821419	0.411436	0.925204	0.988928	0.04486	0.0274117	-0.00887542	0.0985954	1.63653	0.101775	1.01058	0.689226
lh_G_postcentral	6826	6822	Group[T.IBS]:C(sex, Sum)[S.Female]	0.0502454	0.0276938	-0.00404312	0.104534	1.81432	0.0696727	1.03149	0.991752	0.0260029	0.0264101	-0.0257692	0.077775	0.984581	0.324865	0.938085	0.988928	0.0544234	0.0279064	-0.000281897	0.109129	1.95021	0.051192	1.04739	0.689226
rh_G_postcentral	6826	6822	Group[T.IBS]:C(sex, Sum)[S.Female]	0.0174016	0.0280112	-0.0375092	0.0723124	0.621235	0.534465	1.05528	0.991752	0.00678738	0.0279832	-0.0480684	0.0616432	0.242552	0.80836	1.05316	0.988928	0.0204158	0.0282062	-0.0348772	0.0757089	0.723806	0.46921	1.07002	0.996089
lh_S_postcentral	6826	6822	Group[T.IBS]:C(sex, Sum)[S.Female]	0.0128647	0.0254333	-0.0369924	0.0627219	0.505824	0.612997	0.869973	0.991752	-0.0128268	0.0268221	-0.0654064	0.0397529	-0.478217	0.632511	0.967579	0.988928	-0.0090195	0.027124	-0.062191	0.044152	-0.332529	0.7395	0.989484	0.996089
rh_S_postcentral	6826	6822	Group[T.IBS]:C(sex, Sum)[S.Female]	-0.00565761	0.0260682	-0.0567593	0.0454441	-0.217032	0.82819	0.91395	0.991752	0.000183714	0.0274497	-0.0536263	0.0539937	0.00669274	0.99466	1.01339	0.99466	-0.00238153	0.0280796	-0.0574263	0.0526633	-0.0848134	0.932412	1.06043	0.996089
lh_G_and_S_subcentral	6826	6822	Group[T.IBS]:C(sex, Sum)[S.Female]	0.0273733	0.0233747	-0.0184483	0.073195	1.17107	0.241612	0.734841	0.991752	0.0344081	0.0266274	-0.0177898	0.086606	1.29221	0.196328	0.95358	0.988928	0.0495938	0.0272622	-0.00384857	0.103036	1.81914	0.0689335	0.999591	0.689226
rh_G_and_S_subcentral	6826	6822	Group[T.IBS]:C(sex, Sum)[S.Female]	0.0125086	0.0230156	-0.0326092	0.0576264	0.543483	0.586815	0.712438	0.991752	-0.00256217	0.0271476	-0.0557799	0.0506555	-0.0943792	0.924811	0.991205	0.988928	-0.0028493	0.027165	-0.0561012	0.0504026	-0.104889	0.916467	0.992477	0.996089
lh_S_central	6826	6822	Group[T.IBS]:C(sex, Sum)[S.Female]	0.0263923	0.0259057	-0.024391	0.0771756	1.01878	0.308343	0.902595	0.991752	0.055435	0.0275245	0.00147847	0.109392	2.01403	0.0440459	1.01892	0.988928	0.0562388	0.0277398	0.00186017	0.110617	2.02737	0.0426634	1.03492	0.689226
rh_S_central	6826	6822	Group[T.IBS]:C(sex, Sum)[S.Female]	0.0131291	0.02648	-0.0387799	0.0650382	0.495813	0.620043	0.943056	0.991752	0.0565028	0.0273473	0.00289359	0.110112	2.06612	0.0388548	1.00584	0.988928	0.0516221	0.0277295	-0.00273644	0.105981	1.86163	0.0626984	1.03416	0.689226
lh_G_pariet_inf_Supramar	6826	6822	Group[T.IBS]:C(sex, Sum)[S.Female]	0.00109911	0.0267813	-0.0514006	0.0535988	0.0410401	0.967265	0.964637	0.991752	-0.0106617	0.0272762	-0.0641315	0.0428081	-0.390879	0.695899	1.00062	0.988928	-0.00890349	0.0271502	-0.0621263	0.0443193	-0.327935	0.742971	0.991394	0.996089
rh_G_pariet_inf_Supramar	6826	6822	Group[T.IBS]:C(sex, Sum)[S.Female]	-0.000986329	0.0265246	-0.0529828	0.0510101	-0.0371855	0.970338	0.946234	0.991752	-0.0179553	0.0269702	-0.0708253	0.0349148	-0.665744	0.505597	0.978295	0.988928	-0.0192566	0.0271275	-0.072435	0.0339217	-0.709857	0.477817	0.98974	0.996089
lh_G_parietal_sup	6826	6822	Group[T.IBS]:C(sex, Sum)[S.Female]	-0.00570807	0.0255886	-0.0558698	0.0444537	-0.22307	0.823487	0.880635	0.991752	-0.00743625	0.0273304	-0.0610124	0.0461399	-0.272087	0.785564	1.0046	0.988928	-0.010942	0.0266428	-0.0631702	0.0412862	-0.410692	0.681311	0.954688	0.996089
rh_G_parietal_sup	6826	6822	Group[T.IBS]:C(sex, Sum)[S.Female]	-0.007205	0.0263952	-0.0589478	0.0445378	-0.272966	0.784887	0.937025	0.991752	-0.0197352	0.0268903	-0.0724485	0.0329782	-0.733914	0.463026	0.972506	0.988928	-0.0252304	0.0270228	-0.0782035	0.0277426	-0.933674	0.350505	0.982111	0.996089
lh_S_intrapariet_and_P_trans	6826	6822	Group[T.IBS]:C(sex, Sum)[S.Female]	0.0171253	0.0245337	-0.0309684	0.065219	0.69803	0.485182	0.80952	0.991752	-0.0298917	0.0262572	-0.081364	0.0215806	-1.13842	0.254985	0.927252	0.988928	-0.0201383	0.026731	-0.0725394	0.0322628	-0.753368	0.451255	0.961019	0.996089
rh_S_intrapariet_and_P_trans	6826	6822	Group[T.IBS]:C(sex, Sum)[S.Female]	0.0114427	0.0249586	-0.0374841	0.0603694	0.458465	0.646633	0.837806	0.991752	-0.0538725	0.0276917	-0.108157	0.000411983	-1.94543	0.0517637	1.03134	0.988928	-0.0452453	0.0260893	-0.0963885	0.00589794	-1.73424	0.0829199	0.915434	0.689226
lh_G_oc_temp_lat_fusifor	6826	6822	Group[T.IBS]:C(sex, Sum)[S.Female]	0.0141447	0.0233892	-0.0317055	0.0599949	0.604752	0.545364	0.735755	0.991752	-0.0426611	0.0274342	-0.0964406	0.0111184	-1.55504	0.119984	1.01224	0.988928	-0.0272649	0.0274609	-0.0810969	0.026567	-0.992863	0.320812	1.01422	0.996089
rh_G_oc_temp_lat_fusifor	6826	6822	Group[T.IBS]:C(sex, Sum)[S.Female]	0.00553572	0.0241789	-0.0418625	0.052934	0.228948	0.818916	0.786277	0.991752	-0.0248811	0.0274159	-0.0786248	0.0288625	-0.907544	0.364151	1.01089	0.988928	-0.0324015	0.0263794	-0.0841132	0.0193103	-1.22829	0.219381	0.9359	0.996089
lh_G_temporal_middle	6826	6822	Group[T.IBS]:C(sex, Sum)[S.Female]	0.0595684	0.0227659	0.0149402	0.104197	2.61656	0.00890154	0.69706	0.525191	-0.00229913	0.0276165	-0.056436	0.0518378	-0.083252	0.933654	1.02574	0.988928	0.0252018	0.0261443	-0.0260491	0.0764528	0.963952	0.335104	0.919296	0.996089
rh_G_temporal_middle	6826	6822	Group[T.IBS]:C(sex, Sum)[S.Female]	0.0109434	0.0224533	-0.0330721	0.0549589	0.487386	0.626001	0.67805	0.991752	0.00446095	0.0266321	-0.0477463	0.0566682	0.167503	0.86698	0.953921	0.988928	0.00667653	0.0267634	-0.0457882	0.0591412	0.249464	0.803009	0.963353	0.996089
lh_G_and_S_cingul_Ant	6826	6822	Group[T.IBS]:C(sex, Sum)[S.Female]	-0.00819263	0.0266211	-0.0603782	0.0439929	-0.30775	0.758282	0.953129	0.991752	-0.00700411	0.0268348	-0.0596087	0.0456005	-0.261008	0.794094	0.968497	0.988928	-0.000130162	0.0265531	-0.0521825	0.0519221	-0.00490194	0.996089	0.948268	0.996089
rh_G_and_S_cingul_Ant	6826	6822	Group[T.IBS]:C(sex, Sum)[S.Female]	0.00204432	0.0262058	-0.0493273	0.0534159	0.0780101	0.937822	0.923627	0.991752	0.00468062	0.0265349	-0.0473361	0.0566974	0.176395	0.859989	0.946973	0.988928	0.00504683	0.0269412	-0.0477664	0.0578601	0.187327	0.85141	0.976195	0.996089
lh_G_and_S_cingul_Mid_Ant	6826	6822	Group[T.IBS]:C(sex, Sum)[S.Female]	-0.0106278	0.0258904	-0.061381	0.0401254	-0.410492	0.681458	0.901524	0.991752	-0.00784573	0.0282099	-0.063146	0.0474546	-0.278119	0.780929	1.0703	0.988928	-0.0185792	0.0276121	-0.0727075	0.0355491	-0.672863	0.501057	1.02542	0.996089
rh_G_and_S_cingul_Mid_Ant	6826	6822	Group[T.IBS]:C(sex, Sum)[S.Female]	0.0155982	0.0221428	-0.0278086	0.059005	0.704437	0.481185	0.659426	0.991752	-0.0125837	0.0274112	-0.0663182	0.0411508	-0.459071	0.646198	1.01055	0.988928	0.00224414	0.0266839	-0.0500646	0.0545529	0.0841009	0.932979	0.957634	0.996089
lh_G_and_S_cingul_Mid_Post	6826	6822	Group[T.IBS]:C(sex, Sum)[S.Female]	0.033308	0.0262475	-0.0181453	0.0847613	1.26899	0.204486	0.926569	0.991752	-0.0239038	0.0261848	-0.0752342	0.0274265	-0.912889	0.361333	0.922146	0.988928	-0.0104411	0.027522	-0.0643928	0.0435107	-0.379371	0.704424	1.01874	0.996089
rh_G_and_S_cingul_Mid_Post	6826	6822	Group[T.IBS]:C(sex, Sum)[S.Female]	0.00749304	0.026182	-0.0438319	0.058818	0.28619	0.774741	0.921953	0.991752	0.0330787	0.0276021	-0.0210301	0.0871874	1.19841	0.230799	1.02467	0.988928	0.0307703	0.0271792	-0.0225095	0.0840501	1.13213	0.257621	0.993518	0.996089
lh_G_cingul_Post_dorsal	6826	6822	Group[T.IBS]:C(sex, Sum)[S.Female]	0.0460876	0.0232838	0.000444175	0.091731	1.97939	0.0478124	0.729135	0.991752	-0.0198571	0.0260914	-0.0710044	0.0312902	-0.76106	0.446648	0.915581	0.988928	0.00430222	0.0273257	-0.0492647	0.0578691	0.157442	0.874901	1.00425	0.996089
rh_G_cingul_Post_dorsal	6826	6822	Group[T.IBS]:C(sex, Sum)[S.Female]	0.0104429	0.0262017	-0.0409205	0.0618063	0.398559	0.69023	0.923334	0.991752	0.0139345	0.0253857	-0.0358293	0.0636984	0.548913	0.583083	0.86672	0.988928	0.021608	0.0280496	-0.0333779	0.0765939	0.770351	0.441119	1.05816	0.996089
lh_G_cingul_Post_ventral	6826	6822	Group[T.IBS]:C(sex, Sum)[S.Female]	-0.0203374	0.0257225	-0.0707614	0.0300866	-0.790648	0.429177	0.889869	0.991752	0.00192229	0.0259309	-0.0489104	0.052755	0.0741312	0.940908	0.904353	0.988928	-0.00961598	0.0263708	-0.061311	0.042079	-0.364645	0.715388	0.935293	0.996089
rh_G_cingul_Post_ventral	6826	6822	Group[T.IBS]:C(sex, Sum)[S.Female]	0.0269679	0.0248852	-0.0218148	0.0757507	1.08369	0.278539	0.832883	0.991752	-0.0126412	0.0262717	-0.064142	0.0388595	-0.481173	0.630409	0.928278	0.988928	0.00568776	0.0267619	-0.046774	0.0581495	0.212532	0.831699	0.963244	0.996089
lh_S_orbital_med_olfact	6826	6822	Group[T.IBS]:C(sex, Sum)[S.Female]	0.0263047	0.0266834	-0.0260031	0.0786126	0.985807	0.324263	0.957602	0.991752	-0.0200759	0.0248019	-0.0686953	0.0285436	-0.809449	0.418285	0.827316	0.988928	-0.0107832	0.0272359	-0.064174	0.0426076	-0.395919	0.692177	0.997664	0.996089
rh_S_orbital_med_olfact	6826	6822	Group[T.IBS]:C(sex, Sum)[S.Female]	0.0151933	0.0272281	-0.0381823	0.0685689	0.558001	0.576862	0.997096	0.991752	-0.0304155	0.0277402	-0.084795	0.0239639	-1.09644	0.272924	1.03495	0.988928	-0.0147894	0.0277621	-0.0692118	0.0396331	-0.532717	0.594247	1.03659	0.996089
lh_G_orbital	6826	6822	Group[T.IBS]:C(sex, Sum)[S.Female]	0.00457473	0.0267192	-0.0478032	0.0569527	0.171215	0.86406	0.96017	0.991752	0.00340586	0.0256765	-0.0469281	0.0537398	0.132645	0.894478	0.886693	0.988928	0.00499919	0.02685	-0.0476352	0.0576336	0.186189	0.852302	0.969597	0.996089
rh_G_orbital	6826	6822	Group[T.IBS]:C(sex, Sum)[S.Female]	-0.0013881	0.0234944	-0.0474444	0.0446682	-0.0590825	0.952888	0.742384	0.991752	-0.0102407	0.0268789	-0.0629316	0.0424503	-0.380993	0.70322	0.971679	0.988928	-0.0048986	0.0275179	-0.0588423	0.0490451	-0.178015	0.858717	1.01843	0.996089
lh_G_rectus	6826	6822	Group[T.IBS]:C(sex, Sum)[S.Female]	0.0281514	0.0228987	-0.0167372	0.07304	1.22939	0.218968	0.705218	0.991752	-0.00769442	0.0247056	-0.056125	0.0407362	-0.311445	0.755472	0.820901	0.988928	0.00193204	0.0265792	-0.0501715	0.0540356	0.0726897	0.942055	0.950137	0.996089
rh_G_rectus	6826	6822	Group[T.IBS]:C(sex, Sum)[S.Female]	-0.00321582	0.0233082	-0.0489072	0.0424756	-0.13797	0.890269	0.730667	0.991752	-0.0118322	0.0243502	-0.0595661	0.0359017	-0.48592	0.62704	0.797453	0.988928	-0.0191392	0.0270754	-0.0722153	0.0339369	-0.706886	0.479661	0.985938	0.996089
lh_S_circular_insula_ant	6826	6822	Group[T.IBS]:C(sex, Sum)[S.Female]	-0.00562637	0.0226978	-0.0501211	0.0388684	-0.247882	0.804233	0.692897	0.991752	0.00514536	0.0243621	-0.042612	0.0529027	0.211203	0.832735	0.798237	0.988928	-0.0051481	0.0259	-0.0559202	0.045624	-0.198768	0.84245	0.902198	0.996089
rh_S_circular_insula_ant	6826	6822	Group[T.IBS]:C(sex, Sum)[S.Female]	-0.00995029	0.0236539	-0.0563192	0.0364186	-0.420663	0.674015	0.752498	0.991752	0.00550981	0.0247674	-0.043042	0.0540616	0.222462	0.823961	0.825016	0.988928	-0.000373515	0.0266872	-0.0526887	0.0519417	-0.013996	0.988834	0.95787	0.996089
lh_S_circular_insula_inf	6826	6822	Group[T.IBS]:C(sex, Sum)[S.Female]	0.0352597	0.0230915	-0.0100069	0.0805262	1.52695	0.126819	0.717142	0.991752	-0.00287355	0.0244195	-0.0507434	0.0449963	-0.117674	0.906329	0.802001	0.988928	0.0121751	0.0279727	-0.0426602	0.0670103	0.435248	0.663396	1.05238	0.996089
rh_S_circular_insula_inf	6826	6822	Group[T.IBS]:C(sex, Sum)[S.Female]	0.0253192	0.0233421	-0.0204386	0.0710771	1.0847	0.278093	0.732796	0.991752	-0.0159206	0.0257487	-0.0663961	0.0345549	-0.618306	0.536394	0.891687	0.988928	-0.00592759	0.026909	-0.0586776	0.0468225	-0.220283	0.825658	0.973861	0.996089
lh_G_cuneus	6826	6822	Group[T.IBS]:C(sex, Sum)[S.Female]	0.0144137	0.0267847	-0.0380926	0.0669201	0.538134	0.590502	0.964882	0.991752	0.036638	0.0270399	-0.0163686	0.0896446	1.35496	0.175475	0.983358	0.988928	0.0356932	0.0276277	-0.0184658	0.0898521	1.29193	0.196424	1.02658	0.996089
rh_G_cuneus	6826	6822	Group[T.IBS]:C(sex, Sum)[S.Female]	-	-	-	-	-	-	-	-	0.0249704	0.0267677	-0.0275026	0.0774435	0.932857	0.350927	0.963659	0.988928	0.0129884	0.0274441	-0.0408105	0.0667873	0.47327	0.636036	1.01297	0.996089
lh_Lat_Fis_post	6826	6822	Group[T.IBS]:C(sex, Sum)[S.Female]	-0.0224831	0.026612	-0.0746509	0.0296847	-0.844848	0.398225	0.95248	0.991752	-0.0324852	0.0271041	-0.0856177	0.0206474	-1.19853	0.230752	0.988036	0.988928	-0.053575	0.0265562	-0.105633	-0.00151662	-2.01742	0.0436906	0.948489	0.689226
rh_Lat_Fis_post	6826	6822	Group[T.IBS]:C(sex, Sum)[S.Female]	0.0323421	0.0270922	-0.0207671	0.0854513	1.19378	0.232606	0.987167	0.991752	-0.017126	0.0258392	-0.0677789	0.0335269	-0.662792	0.507486	0.897964	0.988928	-0.00167027	0.0273034	-0.0551935	0.051853	-0.0611745	0.951222	1.00262	0.996089

## Sheet: S-T10
Supplementary Table 10. Equivalence test for fixed effect of group × sex
ROI	Cortical Thickness							Surface Area							Cortical Volume
	beta	ci_lo	ci_hi	p_lower	p_upper	p_max	p_max_fdr	beta	ci_lo	ci_hi	p_lower	p_upper	p_max	p_max_fdr	beta	ci_lo	ci_hi	p_lower	p_upper	p_max	p_max_fdr
lh_S_front_sup	-0.0188789	-0.0592619	0.021504	0.000552182	8.02084e-07	0.000552182	0.000958199	0.0324315	-0.0108065	0.0756696	2.92943e-07	0.00567007	0.00567007	0.00708759	0.0279953	-0.0150118	0.0710024	6.06928e-07	0.00331191	0.00331191	0.00462127
rh_S_front_sup	-0.0191032	-0.0597643	0.021558	0.000616513	9.02658e-07	0.000616513	0.0010104	0.0036107	-0.0397535	0.0469749	5.00463e-05	0.000149106	0.000149106	0.000831641	-0.00354263	-0.0465869	0.0395016	0.000133019	4.48928e-05	0.000133019	0.000921014
lh_G_front_sup	0.00532937	-0.0313997	0.0420584	1.51362e-06	1.37882e-05	1.37882e-05	0.000236728	0.01424	-0.0311582	0.0596383	2.05905e-05	0.00106944	0.00106944	0.00206988	0.020406	-0.0242271	0.0650391	5.46869e-06	0.00189095	0.00189095	0.00306641
rh_G_front_sup	0.00240379	-0.0347836	0.0395912	3.69075e-06	9.76663e-06	9.76663e-06	0.000236728	0.0188276	-0.025441	0.0630962	6.06075e-06	0.00144959	0.00144959	0.00241598	0.0275032	-0.0162284	0.0712349	9.94092e-07	0.00358632	0.00358632	0.00485925
lh_S_front_inf	0.0379007	-0.00404546	0.0798468	4.08749e-08	0.00829548	0.00829548	0.00873988	-0.0244448	-0.0672832	0.0183936	0.00210423	1.0875e-06	0.00210423	0.00307936	-0.00421494	-0.0494398	0.0410099	0.000284232	8.75664e-05	0.000284232	0.000921014
rh_S_front_inf	0.00604526	-0.0355067	0.0475973	1.61904e-05	0.000117446	0.000117446	0.000407606	-0.0187967	-0.0624258	0.0248324	0.00125133	4.53427e-06	0.00125133	0.00227514	-0.0240288	-0.0678945	0.019837	0.00247174	2.01208e-06	0.00247174	0.00380267
lh_G_front_middle	0.000818016	-0.0420229	0.043659	6.38707e-05	8.22633e-05	8.22633e-05	0.000363999	0.0363765	-0.00879269	0.0815456	4.19875e-07	0.0112964	0.0112964	0.0123233	0.0260229	-0.0187036	0.0707494	2.16671e-06	0.00364443	0.00364443	0.00485925
rh_G_front_middle	-0.0157484	-0.057645	0.0261483	0.000542533	3.36429e-06	0.000542533	0.000958199	-0.0175223	-0.0626937	0.0276491	0.00150734	1.11451e-05	0.00150734	0.00244434	-0.0173648	-0.061994	0.0272644	0.00131466	9.08462e-06	0.00131466	0.00252981
lh_S_front_middle	0.00286827	-0.0389049	0.0446415	3.04648e-05	7.7271e-05	7.7271e-05	0.000363999	0.00135318	-0.0428248	0.0455312	9.39138e-05	0.000139409	0.000139409	0.000831641	-0.000935521	-0.0472588	0.0453878	0.000249878	0.000194644	0.000249878	0.000921014
rh_S_front_middle	-0.0237627	-0.0650791	0.0175536	0.00137403	5.20982e-07	0.00137403	0.00184245	-0.021183	-0.0669998	0.0246338	0.00260978	8.08413e-06	0.00260978	0.00372826	-0.0303156	-0.0756831	0.0150518	0.00638865	1.3985e-06	0.00638865	0.00766638
lh_G_front_inf_Orbital	0.0204231	-0.0186742	0.0595205	2.58255e-07	0.000475236	0.000475236	0.000876216	-0.0083117	-0.0539873	0.0373639	0.000547546	5.60609e-05	0.000547546	0.00142838	-0.0065383	-0.0498631	0.0367865	0.000224786	3.10256e-05	0.000224786	0.000921014
rh_G_front_inf_Orbital	0.00181313	-0.0378813	0.0415075	1.4884e-05	2.84595e-05	2.84595e-05	0.000279852	0.000922943	-0.0430326	0.0448785	9.28708e-05	0.000121902	0.000121902	0.000831641	-0.0116651	-0.0562048	0.0328747	0.000631252	2.20605e-05	0.000631252	0.00144227
lh_S_precentral_inf_part	-0.000176861	-0.0418225	0.0414688	4.78254e-05	4.51429e-05	4.78254e-05	0.000352712	0.0211129	-0.0217498	0.0639757	2.05051e-06	0.00140301	0.00140301	0.00240515	0.0194879	-0.0240952	0.0630709	3.92963e-06	0.00134923	0.00134923	0.00252981
rh_S_precentral_inf_part	-0.0241195	-0.0671278	0.0188887	0.00209672	1.26708e-06	0.00209672	0.00252462	-0.0433065	-0.0873422	0.000729215	0.0187546	5.46425e-08	0.0187546	0.0200942	-0.0448194	-0.0900843	0.000445569	0.0244909	8.87608e-08	0.0244909	0.0272121
lh_S_precentral_sup_part	0.0200864	-0.0235888	0.0637616	3.69633e-06	0.00148271	0.00148271	0.001944	-0.00131699	-0.0470522	0.0444182	0.000222457	0.000155172	0.000222457	0.000872801	0.000479197	-0.0438679	0.0448263	0.000112901	0.000129722	0.000129722	0.000921014
rh_S_precentral_sup_part	0.00488757	-0.0387694	0.0485446	4.57032e-05	0.000196627	0.000196627	0.000527318	0.0332717	-0.0128627	0.079406	1.22297e-06	0.00955932	0.00955932	0.0108219	0.0262777	-0.0191893	0.0717447	2.96042e-06	0.00426349	0.00426349	0.00556107
lh_G_precentral	0.0323205	-0.00718341	0.0718244	2.34801e-08	0.00275268	0.00275268	0.00318447	0.0288409	-0.0133963	0.071078	3.27044e-07	0.00314994	0.00314994	0.00419992	0.0617661	0.0184413	0.105091	5.44183e-10	0.0787333	0.0787333	0.0787333
rh_G_precentral	0.0187153	-0.0226881	0.0601187	1.4823e-06	0.000714724	0.000714724	0.00113969	0.0215443	-0.021603	0.0646917	2.19229e-06	0.00157812	0.00157812	0.00247092	0.04486	-0.000234316	0.0899542	7.91416e-08	0.02415	0.02415	0.0272121
lh_G_postcentral	0.0502454	0.00468693	0.0958038	3.65855e-08	0.0391849	0.0391849	0.0398605	0.0260029	-0.0174438	0.0694496	1.12763e-06	0.0028627	0.0028627	0.00390368	0.0544234	0.00851518	0.100332	1.99265e-08	0.0551162	0.0551162	0.0570167
rh_G_postcentral	0.0174016	-0.0286791	0.0634822	1.6425e-05	0.00179534	0.00179534	0.00230272	0.00678738	-0.0392471	0.0528219	7.89599e-05	0.000494119	0.000494119	0.00138713	0.0204158	-0.0259856	0.0668173	1.16464e-05	0.00267505	0.00267505	0.00401257
lh_S_postcentral	0.0128647	-0.0289749	0.0547044	5.53636e-06	0.00035567	0.00035567	0.000717222	-0.0128268	-0.0569512	0.0312976	0.000660358	1.54723e-05	0.000660358	0.00146746	-0.0090195	-0.0536406	0.0356016	0.000456714	3.44612e-05	0.000456714	0.00119143
rh_S_postcentral	-0.00565761	-0.0485418	0.0372265	0.000172527	3.00711e-05	0.000172527	0.000484718	0.000183714	-0.0449732	0.0453406	0.000152258	0.000160299	0.000160299	0.000831641	-0.00238153	-0.0485746	0.0438116	0.000291654	0.000153898	0.000291654	0.000921014
lh_G_and_S_subcentral	0.0273733	-0.0110798	0.0658265	3.32385e-08	0.00109523	0.00109523	0.00153391	0.0344081	-0.00939591	0.0782122	2.78719e-07	0.00765083	0.00765083	0.00900097	0.0495938	0.00474541	0.0944421	2.59859e-08	0.0349947	0.0349947	0.0381761
rh_G_and_S_subcentral	0.0125086	-0.0253539	0.0503711	6.47328e-07	8.63727e-05	8.63727e-05	0.000363999	-0.00256217	-0.047222	0.0420977	0.000192188	9.23545e-05	0.000192188	0.000831641	-0.0028493	-0.0475378	0.0418392	0.000201773	8.94033e-05	0.000201773	0.000921014
lh_S_central	0.0263923	-0.0162246	0.0690092	6.62372e-07	0.00254047	0.00254047	0.00299775	0.055435	0.0101551	0.100715	1.04632e-08	0.0567599	0.0567599	0.0577219	0.0562388	0.0106047	0.101873	1.13772e-08	0.0616195	0.0616195	0.0626639
rh_S_central	0.0131291	-0.0304325	0.0566908	1.16044e-05	0.000594534	0.000594534	0.00100221	0.0565028	0.0115144	0.101491	6.76258e-09	0.0601176	0.0601176	0.0601176	0.0516221	0.00600487	0.0972392	2.8852e-08	0.0437876	0.0437876	0.0460922
lh_G_pariet_inf_Supramar	0.00109911	-0.0429582	0.0451564	9.36326e-05	0.000129269	0.000129269	0.000416899	-0.0106617	-0.0555331	0.0342097	0.000603331	2.936e-05	0.000603331	0.00145253	-0.00890349	-0.0535676	0.0357606	0.00045496	3.56539e-05	0.00045496	0.00119143
rh_G_pariet_inf_Supramar	-0.000986329	-0.0446213	0.0426487	0.000110717	8.24542e-05	0.000110717	0.000407606	-0.0179553	-0.0623233	0.0264128	0.00133285	7.34392e-06	0.00133285	0.00235209	-0.0192566	-0.0638835	0.0253702	0.00164882	6.62005e-06	0.00164882	0.00282655
lh_G_parietal_sup	-0.00570807	-0.0478034	0.0363872	0.000134256	2.16323e-05	0.000134256	0.000416899	-0.00743625	-0.0523969	0.0375244	0.000405886	4.96865e-05	0.000405886	0.00128175	-0.010942	-0.0547715	0.0328875	0.000477108	1.86342e-05	0.000477108	0.00119277
rh_G_parietal_sup	-0.007205	-0.0506271	0.0362171	0.00025443	2.89615e-05	0.00025443	0.000577361	-0.0197352	-0.0639718	0.0245014	0.0016061	5.11557e-06	0.0016061	0.00247092	-0.0252304	-0.069685	0.0192241	0.00317576	2.17905e-06	0.00317576	0.0045368
lh_S_intrapariet_and_P_trans	0.0171253	-0.0232346	0.0574851	1.1268e-06	0.000425346	0.000425346	0.000809529	-0.0298917	-0.0730868	0.0133034	0.00425405	4.68782e-07	0.00425405	0.00543071	-0.0201383	-0.0641128	0.0238363	0.00159325	4.22347e-06	0.00159325	0.00281728
rh_S_intrapariet_and_P_trans	0.0114427	-0.0296162	0.0525015	4.89651e-06	0.000227116	0.000227116	0.000558328	-0.0538725	-0.0994275	-0.00831742	0.0516119	1.75229e-08	0.0516119	0.0533917	-0.0452453	-0.0881642	-0.00232632	0.0196985	1.67086e-08	0.0196985	0.022729
lh_G_oc_temp_lat_fusifor	0.0141447	-0.0243324	0.0526218	6.71943e-07	0.000143876	0.000143876	0.000424435	-0.0426611	-0.0877924	0.00247019	0.020026	1.24499e-07	0.020026	0.02108	-0.0272649	-0.0724403	0.0179104	0.00450714	2.17143e-06	0.00450714	0.0057538
rh_G_oc_temp_lat_fusifor	0.00553572	-0.0342405	0.0453119	7.79063e-06	5.59396e-05	5.59396e-05	0.000363999	-0.0248811	-0.0699824	0.0202201	0.00343916	3.16509e-06	0.00343916	0.00448585	-0.0324015	-0.0757975	0.0109946	0.00580198	3.23686e-07	0.00580198	0.00725248
lh_G_temporal_middle	0.0595684	0.0221168	0.09702	1.79323e-12	0.0416551	0.0416551	0.0416551	-0.00229913	-0.0477304	0.0431321	0.000232747	0.000123125	0.000232747	0.000872801	0.0252018	-0.0178075	0.0682112	1.03467e-06	0.00238777	0.00238777	0.00377016
rh_G_temporal_middle	0.0109434	-0.025994	0.0478808	4.98921e-07	4.43823e-05	4.43823e-05	0.000352712	0.00446095	-0.0393509	0.0482728	5.16873e-05	0.00019405	0.00019405	0.000831641	0.00667653	-0.0373514	0.0507045	3.97104e-05	0.000282397	0.000282397	0.000921014
lh_G_and_S_cingul_Ant	-0.00819263	-0.0519863	0.0356011	0.000325371	2.86e-05	0.000325371	0.000685603	-0.00700411	-0.0511494	0.0371412	0.000305562	3.94289e-05	0.000305562	0.00107845	-0.000130162	-0.043812	0.0435517	9.90396e-05	9.5269e-05	9.90396e-05	0.000921014
rh_G_and_S_cingul_Ant	0.00204432	-0.0410663	0.0451549	5.82069e-05	0.000108743	0.000108743	0.000407606	0.00468062	-0.0389714	0.0483326	4.71129e-05	0.000190605	0.000190605	0.000831641	0.00504683	-0.0392736	0.0493672	5.67535e-05	0.000245466	0.000245466	0.000921014
lh_G_and_S_cingul_Mid_Ant	-0.0106278	-0.0532194	0.0319638	0.000322743	1.16133e-05	0.000322743	0.000685603	-0.00784573	-0.0542533	0.0385618	0.000619107	7.67331e-05	0.000619107	0.00145253	-0.0185792	-0.0640032	0.0268449	0.00179843	1.044e-05	0.00179843	0.00299738
rh_G_and_S_cingul_Mid_Ant	0.0155982	-0.0208284	0.0520248	1.16946e-07	8.34577e-05	8.34577e-05	0.000363999	-0.0125837	-0.0576772	0.0325098	0.000812647	2.36973e-05	0.000812647	0.00162529	0.00224414	-0.0416529	0.0461412	7.46991e-05	0.00014497	0.00014497	0.000921014
lh_G_and_S_cingul_Mid_Post	0.033308	-0.00987122	0.0764871	2.37789e-07	0.0061725	0.0061725	0.00674403	-0.0239038	-0.0669798	0.0191722	0.00207216	1.36766e-06	0.00207216	0.00307936	-0.0104411	-0.0557169	0.0348348	0.000649023	3.53312e-05	0.000649023	0.00144227
rh_G_and_S_cingul_Mid_Post	0.00749304	-0.0355784	0.0505645	2.40374e-05	0.000238513	0.000238513	0.000562891	0.0330787	-0.0123289	0.0784863	8.72517e-07	0.00847744	0.00847744	0.00978166	0.0307703	-0.0139416	0.0754823	9.19047e-07	0.00604188	0.00604188	0.00739823
lh_G_cingul_Post_dorsal	0.0460876	0.00778403	0.0843912	2.45098e-10	0.0115436	0.0115436	0.0119486	-0.0198571	-0.0627795	0.0230653	0.00121406	2.65963e-06	0.00121406	0.00227514	0.00430222	-0.0406507	0.0492551	7.89546e-05	0.000266231	0.000266231	0.000921014
rh_G_cingul_Post_dorsal	0.0104429	-0.0326608	0.0535467	1.49565e-05	0.000364689	0.000364689	0.000717222	0.0139345	-0.0278269	0.0556959	4.3871e-06	0.000404899	0.000404899	0.00128175	0.021608	-0.0245357	0.0677517	8.66594e-06	0.00290561	0.00290561	0.00425212
lh_G_cingul_Post_ventral	-0.0203374	-0.0626528	0.021978	0.00111793	1.7795e-06	0.00111793	0.00153391	0.00192229	-0.0407361	0.0445807	5.01917e-05	9.14104e-05	9.14104e-05	0.000831641	-0.00961598	-0.052998	0.033766	0.000352075	1.92676e-05	0.000352075	0.00100593
rh_G_cingul_Post_ventral	0.0269679	-0.0139702	0.067906	2.12917e-07	0.00190439	0.00190439	0.00239061	-0.0126412	-0.0558602	0.0305777	0.000508614	1.08557e-05	0.000508614	0.00138713	0.00568776	-0.0383377	0.0497132	4.62472e-05	0.000246002	0.000246002	0.000921014
lh_S_orbital_med_olfact	0.0263047	-0.0175916	0.0702011	1.35265e-06	0.00322953	0.00322953	0.00359514	-0.0200759	-0.0608769	0.0207252	0.000734133	8.05885e-07	0.000734133	0.00157314	-0.0107832	-0.0555883	0.0340219	0.000602639	2.80926e-05	0.000602639	0.00144227
rh_S_orbital_med_olfact	0.0151933	-0.0295991	0.0599857	1.38806e-05	0.0010463	0.0010463	0.00150565	-0.0304155	-0.0760503	0.0152192	0.00672284	1.57045e-06	0.00672284	0.00823205	-0.0147894	-0.0604602	0.0308815	0.00121406	2.10125e-05	0.00121406	0.00242812
lh_G_orbital	0.00457473	-0.0393804	0.0485299	5.35005e-05	0.000206027	0.000206027	0.000528505	0.00340586	-0.038834	0.0456457	3.36208e-05	9.92203e-05	9.92203e-05	0.000831641	0.00499919	-0.0391712	0.0491696	5.41801e-05	0.000233278	0.000233278	0.000921014
rh_G_orbital	-0.0013881	-0.0400381	0.0372619	1.64849e-05	9.78022e-06	1.64849e-05	0.000236728	-0.0102407	-0.0544584	0.0339771	0.000482117	2.43709e-05	0.000482117	0.00138713	-0.0048986	-0.0501677	0.0403705	0.000315354	8.04661e-05	0.000315354	0.000946063
lh_G_rectus	0.0281514	-0.00951873	0.0658216	1.45878e-08	0.000991388	0.000991388	0.0014623	-0.00769442	-0.048337	0.0329481	0.000110478	7.96083e-06	0.000110478	0.000831641	0.00193204	-0.0417928	0.0456569	7.37446e-05	0.000131066	0.000131066	0.000921014
rh_G_rectus	-0.00321582	-0.0415596	0.035128	2.00617e-05	5.87567e-06	2.00617e-05	0.000236728	-0.0118322	-0.0518901	0.0282257	0.000173149	2.7081e-06	0.000173149	0.000831641	-0.0191392	-0.0636802	0.0254019	0.00159646	6.49871e-06	0.00159646	0.00281728
lh_S_circular_insula_ant	-0.00562637	-0.042966	0.0317133	1.9691e-05	2.05455e-06	1.9691e-05	0.000236728	0.00514536	-0.0349322	0.045223	9.69199e-06	5.89996e-05	5.89996e-05	0.000831641	-0.0051481	-0.0477556	0.0374594	0.00014631	2.92685e-05	0.00014631	0.000921014
rh_S_circular_insula_ant	-0.00995029	-0.0488627	0.0289621	8.40746e-05	2.08943e-06	8.40746e-05	0.000363999	0.00550981	-0.0352345	0.0462541	1.23926e-05	8.07711e-05	8.07711e-05	0.000831641	-0.000373515	-0.044276	0.0435289	0.000110521	9.89753e-05	0.000110521	0.000921014
lh_S_circular_insula_inf	0.0352597	-0.00272763	0.0732469	3.18294e-09	0.00289478	0.00289478	0.00328446	-0.00287355	-0.0430455	0.0372984	4.17571e-05	1.52969e-05	4.17571e-05	0.000831641	0.0121751	-0.0338422	0.0581923	3.56406e-05	0.000958799	0.000958799	0.00198372
rh_S_circular_insula_inf	0.0253192	-0.0130804	0.0637189	5.18159e-08	0.000801699	0.000801699	0.00121283	-0.0159206	-0.0582792	0.026438	0.000629429	4.10293e-06	0.000629429	0.00145253	-0.00592759	-0.050195	0.0383398	0.00027297	4.8689e-05	0.00027297	0.000921014
lh_G_cuneus	0.0144137	-0.0296491	0.0584766	1.16149e-05	0.000797716	0.000797716	0.00121283	0.036638	-0.0078447	0.0811207	2.70152e-07	0.010562	0.010562	0.0117355	0.0356932	-0.00975656	0.0811429	5.55528e-07	0.0109846	0.0109846	0.0129231
rh_G_cuneus	-	-	-	-	-	-	-	0.0249704	-0.0190645	0.0690054	1.85017e-06	0.00284828	0.00284828	0.00390368	0.0129884	-0.0321591	0.058136	2.2715e-05	0.000865657	0.000865657	0.00185498
lh_Lat_Fis_post	-0.0224831	-0.0662618	0.0212957	0.00202459	2.54155e-06	0.00202459	0.00248856	-0.0324852	-0.0770736	0.0121032	0.00707534	6.27478e-07	0.00707534	0.00849041	-0.053575	-0.0972619	-0.00988804	0.043607	4.78363e-09	0.043607	0.0460922
rh_Lat_Fis_post	0.0323421	-0.0122266	0.0769109	6.37472e-07	0.0069513	0.0069513	0.00745685	-0.017126	-0.0596335	0.0253815	0.000769262	3.54954e-06	0.000769262	0.00159158	-0.00167027	-0.0465865	0.043246	0.000183352	0.000114296	0.000183352	0.000921014

## Sheet: S-T11
Supplementary Table 11. Within-group cortical brain-phenotype association and association differences
Brain Measure	ROI	N_HC	N_IBS	IBS-SSS																							PHQ-12
				HC								IBS								Group Difference			Equivalence of group difference				HC								IBS								Group Difference			Equivalence of group difference
				r	Cohen's d	p	p_fdr	ci90_low	ci90_high	p_equivalence	p_equivalence_fdr	r	Cohen's d	p	p_fdr	ci90_low	ci90_high	p_equivalence	p_equivalence_fdr	Cohen's q	p	p_fdr	ci90_low	ci90_high	p_equivalence	p_equivalence_fdr	r	Cohen's d	p	p_fdr	ci90_low	ci90_high	p_equivalence	p_equivalence_fdr	r	Cohen's d	p	p_fdr	ci90_low	ci90_high	p_equivalence	p_equivalence_fdr	Cohen's q	p	p_fdr	ci90_low	ci90_high	p_equivalence	p_equivalence_fdr
Cortical Thickness	lh_S_front_sup	1699	2712	-0.0515978	-0.103333	0.0333048	0.654994	-0.18338	-0.0232863	0.0676925	0.0700677	0.0194842	0.0389759	0.310346	0.692938	-0.02423	0.102182	0.00462055	0.00787477	0.0711304	0.0216071	0.482033	0.0201993	0.122061	0.0934321	0.0934321	0.023801	0.0476154	0.326716	0.897236	-0.0322639	0.127495	0.00410074	0.00590106	0.00340824	0.00681652	0.859174	0.99875	-0.0563661	0.0699991	0.000289596	0.00135698	-0.0203972	0.510062	0.946302	-0.0713283	0.0305339	0.00154633	0.00294301
	rh_S_front_sup	1699	2712	-0.0256579	-0.0513327	0.290367	0.950573	-0.131219	0.028554	0.00513091	0.00688008	0.0142545	0.0285119	0.458007	0.746024	-0.0346828	0.0917066	0.00201489	0.00465509	0.039919	0.197325	0.581353	-0.0110121	0.0908501	0.00995857	0.0136641	0.00332235	0.00664475	0.891138	0.993909	-0.0731902	0.0864797	0.000242184	0.00153445	-0.0106481	-0.0212975	0.57934	0.99875	-0.0844865	0.0418915	0.00109245	0.00230339	-0.0139709	0.651845	0.960726	-0.064902	0.0369602	0.000772977	0.00211561
	lh_G_front_sup	1699	2712	-0.0210487	-0.0421067	0.385786	0.950573	-0.121976	0.0377628	0.00291283	0.00440659	0.00972897	0.0194589	0.612512	0.815455	-0.043729	0.0826467	0.000929766	0.00294918	0.0307811	0.320177	0.69639	-0.02015	0.0817121	0.00435769	0.00756187	0.0164362	0.0328768	0.498295	0.897236	-0.0469789	0.112732	0.00159904	0.00304334	-0.006868	-0.0137363	0.720687	0.99875	-0.0769212	0.0494485	0.000555268	0.00156004	-0.0233058	0.451645	0.946302	-0.0742368	0.0276253	0.00208873	0.0034232
	rh_G_front_sup	1699	2712	-0.0173121	-0.0346293	0.475678	0.950573	-0.114487	0.0452287	0.00179651	0.00328981	0.00192432	0.00384865	0.920205	0.982827	-0.0593335	0.0670308	0.000217024	0.00211443	0.0192381	0.534397	0.788038	-0.0316929	0.0701692	0.00136859	0.00400967	-0.0150188	-0.0300411	0.536071	0.897236	-0.109893	0.049811	0.00132106	0.00290547	0.0150916	0.0301865	0.432031	0.959758	-0.0330097	0.0933828	0.0023117	0.00401149	0.0301127	0.330797	0.946302	-0.0208184	0.0810437	0.00408929	0.00536151
	lh_S_front_inf	1699	2712	0.0184979	0.0370022	0.445973	0.950573	-0.0428593	0.116864	0.00209926	0.00334747	0.0356692	0.0713838	0.0631637	0.338787	0.00812151	0.134646	0.039369	0.0474035	0.0171843	0.578909	0.794317	-0.0337467	0.0681154	0.00109881	0.00378973	0.020512	0.0410326	0.398021	0.897236	-0.0388351	0.1209	0.00272115	0.00433913	-0.0100819	-0.0201649	0.599674	0.99875	-0.0833532	0.0430234	0.000989404	0.00224519	-0.0305971	0.323077	0.946302	-0.0815282	0.0203339	0.00428231	0.00549253
	rh_S_front_inf	1699	2712	-0.0178535	-0.0357127	0.461982	0.950573	-0.115572	0.0441468	0.00192944	0.00328981	0.0145925	0.0291881	0.447415	0.746024	-0.0340072	0.0923834	0.0021303	0.00465509	0.0324489	0.294657	0.69639	-0.0184821	0.08338	0.00509733	0.00835395	-0.00703347	-0.0140673	0.772009	0.977996	-0.0939053	0.0657708	0.000424661	0.00156594	-0.0053162	-0.0106325	0.78197	0.99875	-0.0738162	0.0525511	0.00041622	0.00135698	0.00171734	0.95577	0.994979	-0.0492137	0.0526484	0.000184263	0.00158041
	lh_G_front_middle	1699	2712	-0.0108899	-0.0217812	0.653696	0.963918	-0.101625	0.0580624	0.000743893	0.00190825	0.031553	0.0631375	0.100301	0.493148	-0.000107344	0.126382	0.0242471	0.0298038	0.0424539	0.170351	0.581353	-0.00847721	0.0933849	0.0123507	0.0165612	0.015844	0.0316919	0.513906	0.897236	-0.0481623	0.111546	0.00147697	0.00300487	0.000457745	0.000915489	0.980989	0.99875	-0.0622664	0.0640974	0.000162295	0.00135698	-0.0153875	0.619224	0.960726	-0.0663186	0.0355435	0.000903747	0.00231831
	rh_G_front_middle	1699	2712	0.0216738	0.0433577	0.371829	0.950573	-0.0365139	0.123229	0.00315139	0.0046483	0.018099	0.0362039	0.346015	0.692938	-0.0269986	0.0994065	0.00373336	0.00710543	-0.00357616	0.908053	0.939915	-0.0545072	0.0473549	0.000231218	0.00290981	-0.00575677	-0.0115137	0.812539	0.977996	-0.0913505	0.068323	0.000350915	0.00153445	0.0257677	0.0515525	0.179645	0.79186	-0.0116714	0.114776	0.011451	0.0140632	0.0315302	0.30854	0.946302	-0.0194009	0.0824613	0.00467715	0.00563167
	lh_S_front_middle	1699	2712	-0.0160951	-0.0321944	0.507255	0.950573	-0.112049	0.0476604	0.00152766	0.003108	0.014286	0.0285749	0.457014	0.746024	-0.0346198	0.0917697	0.0020254	0.00465509	0.0303835	0.326467	0.69639	-0.0205476	0.0813145	0.0041962	0.0075023	0.00187224	0.00374449	0.938523	0.993909	-0.0760899	0.0835789	0.000193322	0.00153445	-0.00432347	-0.00864703	0.821923	0.99875	-0.0718301	0.054536	0.00034503	0.00135698	-0.00619575	0.841406	0.994247	-0.0571268	0.0447353	0.000316552	0.00158041
	rh_S_front_middle	1699	2712	-0.0264975	-0.0530137	0.274859	0.950573	-0.132904	0.0268765	0.00566815	0.00716531	-0.000454056	-0.000908113	0.981142	0.999097	-0.06409	0.0622738	0.000162175	0.00211443	0.0260497	0.400184	0.761641	-0.0248814	0.0769807	0.0027531	0.00560113	0.0175322	0.0350697	0.470084	0.897236	-0.0447889	0.114928	0.0018495	0.00330669	-0.00459995	-0.00919999	0.810745	0.99875	-0.0723832	0.0539832	0.000363625	0.00135698	-0.0221339	0.474714	0.946302	-0.073065	0.0287971	0.00185225	0.0032142
	lh_G_front_inf_Orbital	1699	2712	0.00224705	0.0044941	0.926248	0.963918	-0.0753404	0.0843286	0.000204981	0.00156883	0.00161851	0.00323702	0.932853	0.982827	-0.059945	0.0664191	0.000204355	0.00211443	-0.000628541	0.983805	0.983805	-0.0515596	0.0503025	0.000161067	0.00290981	-0.00311366	-0.00622736	0.897938	0.993909	-0.0860622	0.0736075	0.000234504	0.00153445	0.0141378	0.0282785	0.461697	0.959758	-0.034916	0.091473	0.00197638	0.00364395	0.0172524	0.577405	0.946302	-0.0336786	0.0681835	0.00110692	0.0025688
	rh_G_front_inf_Orbital	1699	2712	-0.0354265	-0.0708975	0.144208	0.950573	-0.150832	0.00903684	0.0152801	0.0169335	0.0149759	0.0299551	0.435569	0.746024	-0.0332409	0.0931512	0.00226846	0.00477996	0.0504183	0.103462	0.509764	-0.00051272	0.101349	0.0233605	0.0276795	-0.0359156	-0.0718775	0.138744	0.821518	-0.151815	0.00805966	0.0160762	0.0185979	0.0358227	0.0716915	0.062035	0.79186	0.00842848	0.134955	0.0400559	0.0422018	0.0717691	0.0204585	0.946302	0.020838	0.1227	0.0969232	0.0969232
	lh_S_precentral_inf_part	1699	2712	-0.00109814	-0.00219628	0.963918	0.963918	-0.0820305	0.0776379	0.000171178	0.00156883	0.0303738	0.0607757	0.113668	0.515878	-0.00246453	0.124016	0.0209463	0.0262943	0.0314813	0.309291	0.69639	-0.0194498	0.0824124	0.00465567	0.00784813	0.00524885	0.0104978	0.82881	0.977996	-0.0693385	0.0903341	0.000325037	0.00153445	-0.0162511	-0.0325066	0.397492	0.959758	-0.0957051	0.030692	0.00278841	0.00456989	-0.0215015	0.487428	0.946302	-0.0724325	0.0294296	0.00173499	0.00310195
	rh_S_precentral_inf_part	1699	2712	0.00616037	0.012321	0.799666	0.963918	-0.0675161	0.0921581	0.00037283	0.00156883	0.0247749	0.0495651	0.197009	0.553558	-0.0136556	0.112786	0.00998563	0.0147288	0.0186195	0.54762	0.788038	-0.0323115	0.0695506	0.00128157	0.00397962	0.0152089	0.0304212	0.530924	0.897236	-0.0494313	0.110274	0.00135557	0.00290547	0.01105	0.0221014	0.565106	0.99875	-0.0410882	0.085291	0.00117146	0.00238332	-0.00415956	0.893137	0.994247	-0.0550906	0.0467715	0.000248117	0.00158041
	lh_S_precentral_sup_part	1699	2712	-0.0265569	-0.0531325	0.273785	0.950573	-0.133023	0.0267579	0.00570796	0.00716531	0.037254	0.0745597	0.0522945	0.338787	0.01129	0.137829	0.0469388	0.0532575	0.0638343	0.0392483	0.482033	0.0129033	0.114765	0.0599084	0.0631178	0.0304938	0.061016	0.208838	0.897236	-0.0188924	0.140924	0.00896987	0.01126	-0.00557612	-0.0111524	0.771599	0.99875	-0.0743362	0.0520314	0.000436993	0.00135698	-0.0360794	0.243934	0.946302	-0.0870105	0.0148516	0.00710507	0.0082196
	rh_S_precentral_sup_part	1699	2712	0.00765618	0.0153128	0.752456	0.963918	-0.064526	0.0951516	0.000465634	0.00156883	0.0288229	0.0576697	0.133336	0.526209	-0.00556464	0.120904	0.017191	0.0220493	0.0211745	0.494072	0.783884	-0.0297565	0.0721056	0.00167706	0.00412277	0.0146519	0.0293069	0.546081	0.897236	-0.0505444	0.109158	0.00125668	0.00290547	-0.0239774	-0.0479686	0.211824	0.79186	-0.111187	0.0152496	0.0089298	0.011708	-0.0386349	0.212126	0.946302	-0.089566	0.0122962	0.00890906	0.0101084
	lh_G_precentral	1699	2712	-0.0167811	-0.0335669	0.489322	0.950573	-0.113423	0.0462897	0.00167431	0.00328981	0.0390661	0.0781918	0.0418265	0.338787	0.0149134	0.14147	0.0569799	0.0622558	0.0558686	0.0711819	0.509764	0.00493755	0.1068	0.0349312	0.0396335	0.0115414	0.0230844	0.634447	0.932653	-0.0567603	0.102929	0.000815904	0.00240692	0.0118669	0.0237355	0.536702	0.99875	-0.0394552	0.0869263	0.00134844	0.00265192	0.00032553	0.991612	0.994979	-0.0506055	0.0512566	0.000155116	0.00158041
	rh_G_precentral	1699	2712	-0.0179404	-0.0358866	0.459805	0.950573	-0.115746	0.0439732	0.00195158	0.00328981	0.0219248	0.0438602	0.253608	0.623453	-0.0193521	0.107072	0.0066498	0.0108983	0.0398707	0.197868	0.581353	-0.0110604	0.0908017	0.00991719	0.0136641	0.0140508	0.0281044	0.562673	0.897236	-0.0517455	0.107954	0.00115742	0.00289656	3.01019e-05	6.02037e-05	0.99875	0.99875	-0.0631217	0.0632421	0.000148957	0.00135698	-0.0140216	0.650665	0.960726	-0.0649527	0.0369094	0.00077734	0.00211561
	lh_G_postcentral	1699	2712	-0.0389474	-0.077954	0.108352	0.950573	-0.157909	0.00200129	0.0218468	0.0234357	0.0282477	0.056518	0.141265	0.526209	-0.00671435	0.11975	0.0159527	0.0209158	0.0672224	0.0299317	0.482033	0.0162913	0.118153	0.0740712	0.0753483	0.0498373	0.0997985	0.0398227	0.469907	0.0197659	0.179831	0.0586611	0.0629274	0.0221388	0.0442884	0.249002	0.798689	-0.0189244	0.107501	0.00686065	0.00963758	-0.0277362	0.370382	0.946302	-0.0786673	0.0231949	0.00325072	0.00467787
	rh_G_postcentral	1699	2712	-0.0200934	-0.0401949	0.407723	0.950573	-0.120061	0.0396715	0.00257963	0.00400522	0.0413684	0.0828077	0.0311314	0.338787	0.0195176	0.146098	0.0720919	0.0773349	0.0614881	0.0470554	0.482033	0.0105571	0.112419	0.0514119	0.0551509	0.0267946	0.0536085	0.26951	0.897236	-0.026283	0.1335	0.00586988	0.00769607	0.0265999	0.0532187	0.165985	0.79186	-0.0100079	0.116445	0.01282	0.0151276	-0.000194837	0.994979	0.994979	-0.0511259	0.0507362	0.000152613	0.00158041
	lh_S_postcentral	1699	2712	-0.0355628	-0.0711706	0.142669	0.950573	-0.151106	0.00876455	0.0154985	0.0169335	0.0231458	0.0463039	0.228112	0.611754	-0.0169118	0.10952	0.00793432	0.0123191	0.0587277	0.0578741	0.487796	0.00779661	0.109659	0.0426739	0.0475049	0.0209382	0.0418856	0.388285	0.897236	-0.0379835	0.121755	0.00287242	0.00434546	-0.00214797	-0.00429594	0.910967	0.99875	-0.0674781	0.0588862	0.000226748	0.00135698	-0.0230893	0.455859	0.946302	-0.0740203	0.0278418	0.00204308	0.0034232
	rh_S_postcentral	1699	2712	-0.00524636	-0.0104929	0.82889	0.963918	-0.0903292	0.0693434	0.000324915	0.00156883	-0.00813612	-0.0162728	0.671886	0.848309	-0.0794588	0.0469133	0.000699582	0.00294824	-0.00288989	0.925641	0.9416	-0.053821	0.0480412	0.000212714	0.00290981	0.0350491	0.0701414	0.148535	0.821518	-0.00979086	0.150074	0.0146893	0.0173333	-0.00034825	-0.000696499	0.985536	0.99875	-0.0638784	0.0624854	0.000158777	0.00135698	-0.0354118	0.25277	0.946302	-0.0863428	0.0155193	0.00669041	0.00789468
	lh_G_and_S_subcentral	1699	2712	-0.0243253	-0.048665	0.316165	0.950573	-0.128546	0.0312164	0.00437101	0.00599743	0.00947135	0.0189436	0.621957	0.815455	-0.044244	0.0821311	0.000888346	0.00294918	0.0338017	0.274987	0.69639	-0.0171293	0.0847328	0.00577724	0.00921236	-0.000794492	-0.00158898	0.973891	0.993909	-0.0814231	0.0782452	0.00016316	0.00153445	0.00358866	0.00717737	0.851803	0.99875	-0.0560053	0.0703601	0.00029982	0.00135698	0.00438317	0.88743	0.994247	-0.0465479	0.0553142	0.000254895	0.00158041
	rh_G_and_S_subcentral	1699	2712	-0.0144319	-0.0288668	0.552125	0.963918	-0.108718	0.0509839	0.00121948	0.00266479	0.0139445	0.0278917	0.467846	0.746024	-0.0353025	0.0910859	0.00191405	0.00465509	0.0283783	0.359407	0.718389	-0.0225528	0.0793094	0.00346052	0.00658614	-0.00069792	-0.00139584	0.977064	0.993909	-0.08123	0.0784383	0.000160684	0.00153445	0.0168185	0.0336418	0.381217	0.959758	-0.029558	0.0968415	0.00305256	0.0048676	0.017518	0.571559	0.946302	-0.033413	0.0684491	0.00113904	0.0025688
	lh_S_central	1699	2712	-0.0343122	-0.0686649	0.15727	0.950573	-0.148593	0.0112633	0.013592	0.0154763	-0.0178631	-0.0357318	0.352342	0.692938	-0.0989338	0.0274702	0.0035985	0.00707705	0.0164608	0.594995	0.797835	-0.0344703	0.0673918	0.00101603	0.00374662	-0.00646342	-0.0129271	0.790036	0.977996	-0.0927645	0.0669103	0.000390114	0.00153445	-0.00773418	-0.0154688	0.687217	0.99875	-0.0786545	0.0477168	0.000650468	0.00169853	-0.00127082	0.967262	0.994979	-0.0522019	0.0496602	0.000174396	0.00158041
	rh_S_central	1699	2712	-0.0177187	-0.0354431	0.46537	0.950573	-0.115302	0.0444161	0.00189554	0.00328981	0.00235574	0.0047115	0.902396	0.982827	-0.0584707	0.0678937	0.000236146	0.00211443	0.0200763	0.51674	0.783884	-0.0308547	0.0710074	0.00149513	0.00400967	-0.00619217	-0.0123846	0.798654	0.977996	-0.0922217	0.0674526	0.000374609	0.00153445	-0.000787651	-0.0015753	0.967293	0.99875	-0.0647572	0.0616066	0.000173341	0.00135698	0.0054046	0.861437	0.994247	-0.0455265	0.0563357	0.000288106	0.00158041
	lh_G_pariet_inf_Supramar	1699	2712	0.00692696	0.0138543	0.775368	0.963918	-0.0659837	0.0936922	0.000417999	0.00156883	0.0459734	0.0920441	0.0165842	0.338787	0.0287285	0.15536	0.11126	0.113179	0.0390787	0.206922	0.581353	-0.0118523	0.0900098	0.00926029	0.0135672	0.0297939	0.0596142	0.219487	0.897236	-0.0202908	0.139519	0.00829172	0.010635	0.000846564	0.00169313	0.964848	0.99875	-0.0614888	0.064875	0.000175386	0.00135698	-0.0289561	0.349707	0.946302	-0.0798872	0.021975	0.00365962	0.00502134
	rh_G_pariet_inf_Supramar	1699	2712	0.0141121	0.0282271	0.560969	0.963918	-0.0516229	0.108077	0.00116721	0.00264866	0.0360502	0.0721473	0.0603936	0.338787	0.00888322	0.135411	0.0410914	0.0482781	0.0219527	0.478338	0.783884	-0.0289783	0.0728838	0.00181794	0.00418512	0.0127343	0.0254706	0.599843	0.907454	-0.0543764	0.105318	0.000964622	0.00263573	0.00355235	0.00710474	0.853285	0.99875	-0.0560779	0.0702874	0.000297735	0.00135698	-0.00918261	0.766804	0.994247	-0.0601137	0.0417485	0.000449189	0.00176681
	lh_G_parietal_sup	1699	2712	0.00728861	0.0145776	0.763979	0.963918	-0.0652607	0.0944159	0.000441026	0.00156883	0.0538566	0.10787	0.00498927	0.294367	0.0445044	0.171235	0.209521	0.209521	0.0466201	0.132163	0.523667	-0.00431099	0.0975511	0.0173651	0.0222727	0.050502	0.101133	0.0372447	0.469907	0.0210951	0.181171	0.0619532	0.064127	0.022373	0.0447573	0.244027	0.798689	-0.0184562	0.107971	0.00709826	0.00973948	-0.0281682	0.362974	0.946302	-0.0790993	0.0227628	0.00339059	0.00476297
	rh_G_parietal_sup	1699	2712	0.0261811	0.0523801	0.280636	0.950573	-0.0275087	0.132269	0.00546007	0.00715876	0.038443	0.0769428	0.0452061	0.338787	0.0136675	0.140218	0.0533519	0.0593917	0.0122748	0.691792	0.823722	-0.0386562	0.0632059	0.000639408	0.00310408	0.0346546	0.0693509	0.153164	0.821518	-0.0105791	0.149281	0.0140927	0.0169688	0.0425337	0.0851444	0.0266771	0.79186	0.0218481	0.148441	0.0808284	0.0808284	0.00789087	0.798846	0.994247	-0.0430402	0.0588219	0.000386515	0.00162888
	lh_S_intrapariet_and_P_trans	1699	2712	-0.00430892	-0.00861791	0.859111	0.963918	-0.0884535	0.0712177	0.000281776	0.00156883	0.0258171	0.0516514	0.178811	0.553558	-0.0115726	0.114875	0.0115286	0.016195	0.0301318	0.33049	0.69639	-0.0207993	0.0810629	0.00409676	0.0075023	0.0374037	0.0748599	0.123095	0.821518	-0.00508603	0.154806	0.0187208	0.0212409	0.00806723	0.016135	0.674504	0.99875	-0.047051	0.079321	0.000690927	0.00169853	-0.0293538	0.343129	0.946302	-0.0802849	0.0215773	0.00380256	0.00509889
	rh_S_intrapariet_and_P_trans	1699	2712	0.0308939	0.0618174	0.202921	0.950573	-0.018093	0.141728	0.009379	0.0115284	0.0424381	0.0849527	0.0270206	0.338787	0.0216569	0.148249	0.0800828	0.084373	0.0115598	0.708901	0.823722	-0.0393712	0.0624909	0.000589766	0.00310408	0.0510966	0.102327	0.0350604	0.469907	0.022284	0.18237	0.0650183	0.0661393	0.0247312	0.0494775	0.197801	0.79186	-0.013743	0.112698	0.00992503	0.0124591	-0.0264049	0.39379	0.946302	-0.077336	0.0245262	0.0028518	0.00442779
	lh_G_oc_temp_lat_fusifor	1699	2712	-0.00856193	-0.0171245	0.724299	0.963918	-0.0969644	0.0627155	0.000531807	0.00156883	0.0114457	0.0228929	0.551258	0.815455	-0.0402972	0.0860831	0.00125434	0.0033639	0.0200083	0.518161	0.783884	-0.0309227	0.0709394	0.00148448	0.00400967	0.0266231	0.053265	0.27259	0.897236	-0.0266257	0.133156	0.00575263	0.00769607	-0.00482083	-0.00964177	0.801842	0.99875	-0.0728251	0.0535416	0.000379146	0.00135698	-0.0314502	0.309769	0.946302	-0.0823813	0.0194808	0.00464207	0.00563167
	rh_G_oc_temp_lat_fusifor	1699	2712	-0.00847404	-0.0169487	0.727016	0.963918	-0.0967885	0.0628911	0.000525024	0.00156883	0.0195563	0.0391201	0.308559	0.692938	-0.024086	0.102326	0.00467148	0.00787477	0.028033	0.365282	0.718389	-0.022898	0.0789641	0.00334624	0.00658094	0.0501107	0.100347	0.0387446	0.469907	0.0203126	0.180382	0.0599981	0.0632123	0.00800607	0.0160127	0.676831	0.99875	-0.0471733	0.0791986	0.000683328	0.00169853	-0.0421464	0.173467	0.946302	-0.0930775	0.00878462	0.0120363	0.0131508
	lh_G_temporal_middle	1699	2712	0.0121246	0.024251	0.617424	0.963918	-0.0555949	0.104097	0.000885748	0.00216373	0.0247738	0.0495628	0.197029	0.553558	-0.0136578	0.112783	0.00998407	0.0147288	0.0126537	0.682789	0.823722	-0.0382774	0.0635848	0.000667247	0.00310408	0.0387208	0.0774998	0.110424	0.821518	-0.00245414	0.157454	0.021362	0.0237803	0.0195482	0.0391039	0.308759	0.828036	-0.0241021	0.10231	0.00466575	0.0072442	-0.0191895	0.535431	0.946302	-0.0701205	0.0317416	0.00136156	0.00267773
	rh_G_temporal_middle	1699	2712	0.0182261	0.0364583	0.452687	0.950573	-0.0434023	0.116319	0.00202604	0.00332046	0.0281462	0.0563148	0.142701	0.526209	-0.00691717	0.119547	0.0157424	0.0209158	0.00992553	0.74855	0.833292	-0.0410055	0.0608566	0.000489375	0.00310408	0.0181731	0.0363522	0.454003	0.897236	-0.0435083	0.116213	0.00201203	0.00339171	0.0106517	0.0213047	0.579212	0.99875	-0.0418843	0.0844937	0.00109313	0.00230339	-0.00752294	0.808038	0.994247	-0.058454	0.0434081	0.000370209	0.00162888
	lh_G_and_S_cingul_Ant	1699	2712	-0.0564049	-0.11299	0.0199501	0.654994	-0.193078	-0.0329011	0.0978152	0.0978152	0.00962191	0.0192447	0.616429	0.815455	-0.043943	0.0824324	0.000912342	0.00294918	0.066087	0.0328161	0.482033	0.015156	0.117018	0.0690651	0.0714884	-0.0244285	-0.0488716	0.314115	0.897236	-0.128753	0.0310102	0.00442604	0.00607294	-0.00586143	-0.0117231	0.760261	0.99875	-0.0749071	0.051461	0.000460899	0.00135965	0.0185719	0.548645	0.946302	-0.0323592	0.0695029	0.00127508	0.00259413
	rh_G_and_S_cingul_Ant	1699	2712	-0.00157997	-0.00315994	0.948105	0.963918	-0.0829942	0.0766744	0.000184664	0.00156883	0.00984942	0.0196998	0.608117	0.815455	-0.0434882	0.0828878	0.000949736	0.00294918	0.0114297	0.712031	0.823722	-0.0395014	0.0623608	0.000581124	0.00310408	0.0141808	0.0283645	0.559064	0.897236	-0.0514856	0.108215	0.00117826	0.00289656	0.0405369	0.0811404	0.0346873	0.79186	0.0178546	0.144426	0.0663137	0.0674571	0.0263773	0.394284	0.946302	-0.0245537	0.0773084	0.00284402	0.00442779
	lh_G_and_S_cingul_Mid_Ant	1699	2712	-0.0045316	-0.00906329	0.851912	0.963918	-0.088899	0.0707724	0.00029151	0.00156883	-0.0251503	-0.0503166	0.190304	0.553558	-0.113538	0.0129053	0.0105193	0.0151375	-0.020624	0.505369	0.783884	-0.0715551	0.0303071	0.00158348	0.00406196	-0.0208433	-0.0416957	0.39044	0.897236	-0.121564	0.0381731	0.0028381	0.00434546	-0.0238251	-0.0476638	0.214742	0.79186	-0.110882	0.015554	0.00873972	0.011708	-0.00298328	0.923245	0.994979	-0.0539144	0.0479478	0.000215148	0.00158041
	rh_G_and_S_cingul_Mid_Ant	1699	2712	0.00206767	0.00413534	0.932121	0.963918	-0.0756991	0.0839698	0.000199321	0.00156883	-0.00266613	-0.00533229	0.889614	0.982827	-0.0685146	0.05785	0.000250865	0.00211443	-0.00473381	0.878492	0.939915	-0.0556649	0.0461973	0.000265871	0.00290981	-0.00805173	-0.016104	0.740116	0.977996	-0.0959433	0.0637353	0.000493533	0.00171285	-0.020294	-0.0405964	0.290659	0.816614	-0.103804	0.0226115	0.00522235	0.00790048	-0.0122449	0.692505	0.960726	-0.063176	0.0386862	0.000637253	0.00201187
	lh_G_and_S_cingul_Mid_Post	1699	2712	-0.00339997	-0.00679997	0.888612	0.963918	-0.086635	0.073035	0.0002451	0.00156883	0.01869	0.0373866	0.330489	0.692938	-0.0258174	0.100591	0.00409128	0.00753472	0.0220922	0.475548	0.783884	-0.0288389	0.0730232	0.00184429	0.00418512	0.0001514	0.0003028	0.995024	0.995024	-0.0795313	0.0801369	0.000147325	0.00153445	-0.0268858	-0.0537911	0.161478	0.79186	-0.117019	0.00943651	0.013322	0.0154117	-0.0270437	0.382448	0.946302	-0.0779748	0.0238874	0.00303735	0.00448009
	rh_G_and_S_cingul_Mid_Post	1699	2712	0.00236745	0.00473491	0.922308	0.963918	-0.0750996	0.0845695	0.000208864	0.00156883	0.0173502	0.0347056	0.366342	0.697231	-0.0284953	0.0979065	0.00332036	0.00675521	0.0149845	0.628432	0.806033	-0.0359466	0.0659156	0.000864611	0.00364372	-0.00571544	-0.0114311	0.81386	0.977996	-0.0912678	0.0684056	0.000348739	0.00153445	0.000609438	0.00121888	0.974691	0.99875	-0.061963	0.0644008	0.00016729	0.00135698	0.00632494	0.838144	0.994247	-0.0446061	0.057256	0.000321439	0.00158041
	lh_G_cingul_Post_dorsal	1699	2712	-0.0102984	-0.0205979	0.671374	0.963918	-0.100441	0.0592446	0.00068364	0.0019054	0.0361886	0.0724245	0.0594128	0.338787	0.00915986	0.135689	0.0417319	0.0482781	0.0465032	0.133136	0.523667	-0.00442792	0.0974342	0.0172037	0.0222727	0.011078	0.0221574	0.648115	0.932653	-0.0576865	0.102001	0.000764053	0.00237259	0.0292214	0.0584677	0.128048	0.79186	-0.00476816	0.121704	0.0180962	0.0197718	0.0181512	0.557737	0.946302	-0.0327798	0.0690823	0.00121909	0.0025688
	rh_G_cingul_Post_dorsal	1699	2712	-0.0157816	-0.0315671	0.515565	0.950573	-0.111421	0.0482869	0.00146462	0.00308616	0.00791252	0.0158255	0.680398	0.848309	-0.0473603	0.0790114	0.000671853	0.00294824	0.0236956	0.444114	0.783884	-0.0272355	0.0746266	0.00217327	0.00457938	-0.0153347	-0.030673	0.52753	0.897236	-0.110526	0.0491799	0.00137887	0.00290547	0.0156243	0.0312525	0.415951	0.959758	-0.0319448	0.0944498	0.00252072	0.00424921	0.0309615	0.317348	0.946302	-0.0199696	0.0818926	0.0044328	0.00556458
	lh_G_cingul_Post_ventral	1699	2712	-0.0123706	-0.0247432	0.610301	0.963918	-0.104589	0.0551031	0.000916836	0.00216373	0.0224427	0.0448967	0.242561	0.622222	-0.018317	0.10811	0.0071703	0.0114337	0.0348177	0.260817	0.69639	-0.0161133	0.0857488	0.00633962	0.0098431	0.0179048	0.0358153	0.460698	0.897236	-0.0440444	0.115675	0.00194247	0.00337076	0.0291437	0.0583123	0.129065	0.79186	-0.00492331	0.121548	0.0179168	0.0197718	0.0112453	0.716474	0.960726	-0.0396857	0.0621764	0.00056908	0.0020003
	rh_G_cingul_Post_ventral	1699	2712	-0.00838144	-0.0167635	0.729882	0.963918	-0.0966032	0.0630762	0.000517963	0.00156883	0.014517	0.0290372	0.449767	0.746024	-0.034158	0.0922323	0.00210403	0.00465509	0.0228997	0.459566	0.783884	-0.0280314	0.0738308	0.00200385	0.00437878	-0.00608457	-0.0121694	0.80208	0.977996	-0.0920064	0.0676677	0.000368619	0.00153445	0.0328579	0.0657512	0.0870022	0.79186	0.00250111	0.129001	0.0283983	0.0304636	0.0389543	0.208371	0.946302	-0.0119767	0.0898854	0.00916067	0.0101977
	lh_S_orbital_med_olfact	1699	2712	-0.0174692	-0.0349437	0.471681	0.950573	-0.114802	0.0449147	0.0018342	0.00328981	0.000186074	0.000372148	0.992271	0.999097	-0.0628097	0.063554	0.000153698	0.00211443	0.017657	0.568511	0.794317	-0.033274	0.0685881	0.00115619	0.00378973	-0.00161595	-0.0032319	0.946925	0.993909	-0.0830662	0.0766024	0.00018571	0.00153445	-0.0282884	-0.0565994	0.140692	0.79186	-0.119832	0.00663301	0.0160377	0.0181966	-0.02668	0.388881	0.946302	-0.0776111	0.0242511	0.00293041	0.00443319
	rh_S_orbital_med_olfact	1699	2712	-0.00395605	-0.00791217	0.870542	0.963918	-0.0877475	0.0719232	0.000266969	0.00156883	-0.00958451	-0.0191699	0.6178	0.815455	-0.0823576	0.0440178	0.000906326	0.00294918	-0.00562873	0.855752	0.934989	-0.0565598	0.0453023	0.000295913	0.00290981	-0.000944698	-0.0018894	0.968957	0.993909	-0.0817236	0.0779448	0.000167081	0.00153445	0.00177828	0.00355656	0.926243	0.99875	-0.0596255	0.0667386	0.000210885	0.00135698	0.00272298	0.929924	0.994979	-0.0482081	0.053654	0.000208428	0.00158041
	lh_G_orbital	1699	2712	-0.0331254	-0.0662873	0.172146	0.950573	-0.146209	0.0136345	0.0119736	0.0141288	0.00614786	0.012296	0.748931	0.883739	-0.0508883	0.0754802	0.000486115	0.00286808	0.0392855	0.204529	0.581353	-0.0116456	0.0902166	0.00942804	0.0135672	-0.0192382	-0.0384835	0.427977	0.897236	-0.118347	0.0413801	0.00231102	0.00378751	-0.00132806	-0.00265613	0.944881	0.99875	-0.0658381	0.0605259	0.000192967	0.00135698	0.0179125	0.562929	0.946302	-0.0330186	0.0688436	0.00118832	0.0025688
	rh_G_orbital	1699	2712	-0.0437338	-0.0875514	0.0713372	0.950573	-0.167538	-0.00756442	0.0344665	0.0363129	0.0104296	0.0208604	0.58715	0.815455	-0.0423284	0.0840491	0.00105156	0.00300997	0.0541917	0.080091	0.509764	0.00326065	0.105123	0.0309537	0.0358092	-0.0465022	-0.0931052	0.0551467	0.542276	-0.173112	-0.0130982	0.0441696	0.0482594	0.00896375	0.0179282	0.64075	0.99875	-0.0452587	0.0811152	0.000811657	0.00191551	0.0554998	0.0730683	0.946302	0.00456873	0.106431	0.0340222	0.035216
	lh_G_rectus	1699	2712	-0.0343456	-0.0687318	0.156866	0.950573	-0.14866	0.0111966	0.0136401	0.0154763	0.00479954	0.00959919	0.802699	0.928612	-0.0535841	0.0727825	0.000377624	0.00247554	0.0391587	0.205994	0.581353	-0.0117724	0.0900898	0.00932487	0.0135672	-0.0168269	-0.0336585	0.488137	0.897236	-0.113515	0.0461982	0.00168454	0.00310587	-0.0211517	-0.0423129	0.270742	0.798689	-0.105523	0.0208972	0.00593493	0.00869606	-0.00432642	0.888878	0.994247	-0.0552575	0.0466046	0.000253159	0.00158041
	rh_G_rectus	1699	2712	-0.007858	-0.0157165	0.746152	0.963918	-0.0955555	0.0641225	0.000479681	0.00156883	-0.00418937	-0.00837881	0.827358	0.938734	-0.0715618	0.0548042	0.000336333	0.00247554	0.00366877	0.905683	0.939915	-0.0472623	0.0545998	0.000233827	0.00290981	-0.0091223	-0.0182454	0.707061	0.977996	-0.0980861	0.0615954	0.000577003	0.00189129	0.00503181	0.0100637	0.793362	0.99875	-0.0531197	0.0732472	0.000394544	0.00135698	0.0141544	0.64758	0.960726	-0.0367767	0.0650855	0.000788872	0.00211561
	lh_S_circular_insula_ant	1699	2712	-0.0105677	-0.0211366	0.663303	0.963918	-0.10098	0.0587064	0.00071049	0.0019054	-2.17308e-05	-4.34616e-05	0.999097	0.999097	-0.0632253	0.0631384	0.000148706	0.00211443	0.0105464	0.733403	0.83213	-0.0403847	0.0614775	0.000525486	0.00310408	-0.0243999	-0.0488143	0.314683	0.897236	-0.128696	0.0310674	0.00441071	0.00607294	-0.00354547	-0.00709099	0.853566	0.99875	-0.0702737	0.0560917	0.000297342	0.00135698	0.0208592	0.500526	0.946302	-0.0300718	0.0717903	0.00162286	0.00299215
	rh_S_circular_insula_ant	1699	2712	-0.0315772	-0.063186	0.1931	0.950573	-0.1431	0.0167278	0.0101155	0.0121799	0.0188825	0.0377718	0.325531	0.692938	-0.0254326	0.100976	0.00421433	0.00753472	0.0504725	0.103092	0.509764	-0.000458548	0.101404	0.0234572	0.0276795	-0.0163805	-0.0327653	0.499753	0.897236	-0.112621	0.0470902	0.00158718	0.00304334	0.0387844	0.0776273	0.0433266	0.79186	0.0143503	0.140904	0.0553167	0.0572576	0.0551858	0.0747061	0.946302	0.00425478	0.106117	0.0332638	0.0350458
	lh_S_circular_insula_inf	1699	2712	-0.00831379	-0.0166281	0.731978	0.963918	-0.0964678	0.0632115	0.000512861	0.00156883	0.00752836	0.0150571	0.695117	0.848309	-0.0481283	0.0782426	0.000626572	0.00294824	0.0158425	0.6089	0.798336	-0.0350886	0.0667735	0.000949876	0.00373618	-0.0128684	-0.0257389	0.596007	0.907454	-0.105586	0.0541085	0.000982813	0.00263573	-0.0242215	-0.0484572	0.207206	0.79186	-0.111676	0.0147617	0.00924205	0.0118539	-0.0113572	0.713778	0.960726	-0.0622882	0.0395739	0.000576357	0.0020003
	rh_S_circular_insula_inf	1699	2712	0.0234065	0.0468258	0.334802	0.950573	-0.033052	0.126704	0.00390739	0.00562283	0.0105363	0.0210738	0.58333	0.815455	-0.0421151	0.0842627	0.00107135	0.00300997	-0.0128741	0.677574	0.823722	-0.0638051	0.038057	0.00068395	0.00310408	-0.0324354	-0.0649049	0.181266	0.891224	-0.144823	0.0150133	0.0111116	0.0136581	-0.014815	-0.0296332	0.440518	0.959758	-0.092829	0.0335625	0.00220951	0.00395034	0.0176307	0.569088	0.946302	-0.0333004	0.0685617	0.00115292	0.0025688
	lh_G_cuneus	1699	2712	-0.00311969	-0.00623941	0.897741	0.963918	-0.0860743	0.0735955	0.000234723	0.00156883	0.0455762	0.0912473	0.0175461	0.338787	0.027934	0.154561	0.107378	0.111145	0.0487275	0.115559	0.523667	-0.00220353	0.0996586	0.0205051	0.0257404	0.0809331	0.162399	0.000822876	0.0485497	0.0820397	0.242758	0.390353	0.390353	0.0212737	0.0425571	0.267986	0.798689	-0.0206533	0.105768	0.00604302	0.00869606	-0.0598335	0.0533146	0.946302	-0.110765	-0.00890244	0.0460182	0.0468116
	lh_Lat_Fis_post	1699	2712	-0.02425	-0.0485144	0.317666	0.950573	-0.128395	0.0313667	0.00433126	0.00599743	0.0261257	0.0522693	0.173669	0.553558	-0.0109557	0.115494	0.0120236	0.0164975	0.0503865	0.103681	0.509764	-0.000544607	0.101318	0.0233037	0.0276795	0.0227216	0.0454548	0.349145	0.897236	-0.0344205	0.12533	0.003591	0.00529672	-0.0259125	-0.0518423	0.17721	0.79186	-0.115067	0.011382	0.0116796	0.0140632	-0.0486437	0.116187	0.946302	-0.0995748	0.00228734	0.0203716	0.0218532
	rh_Lat_Fis_post	1699	2712	-0.0536139	-0.107382	0.0269814	0.654994	-0.187446	-0.0273182	0.079314	0.0806815	0.00728434	0.0145691	0.704528	0.848309	-0.0486162	0.0777543	0.000599291	0.00294824	0.0609498	0.0490203	0.482033	0.0100187	0.111881	0.0496044	0.0541975	-0.00143162	-0.00286324	0.952972	0.993909	-0.0826975	0.076971	0.000180409	0.00153445	-0.0138226	-0.0276479	0.471745	0.959758	-0.0908418	0.0355461	0.00187568	0.00356984	-0.0123919	0.689006	0.960726	-0.063323	0.0385392	0.000647891	0.00201187
Surface Area	lh_S_front_sup	1699	2712	0.0049588	0.00991773	0.838136	0.974573	-0.0699183	0.0897538	0.000311069	0.00129631	-0.0629558	-0.126162	0.00102401	0.00599446	-0.189595	-0.062729	0.369605	0.396005	-0.067998	0.0280889	0.192108	-0.118929	-0.017067	0.0776477	0.087903	0.0317144	0.0634607	0.191172	0.716894	-0.0164538	0.143375	0.0102693	0.0136924	-0.0456195	-0.0913341	0.0174389	0.0454928	-0.154648	-0.0280206	0.107796	0.16584	-0.0773762	0.0124573	0.0677021	-0.128307	-0.0264452	0.131741	0.15499
	rh_S_front_sup	1699	2712	-0.0264581	-0.0529347	0.275575	0.974573	-0.132825	0.0269553	0.00564185	0.00730463	-0.0270789	-0.0541776	0.158487	0.202324	-0.117406	0.00905065	0.0136704	0.0585875	-0.000621192	0.983994	0.983994	-0.0515523	0.0503099	0.00016092	0.00294883	0.0237071	0.0474276	0.328628	0.758372	-0.0324514	0.127307	0.00405398	0.00694969	-0.0302568	-0.0605413	0.115068	0.164228	-0.123781	0.00269845	0.0206405	0.062703	-0.0539776	0.0812912	0.162064	-0.104909	-0.00304652	0.0304739	0.0589818
	lh_G_front_sup	1699	2712	-0.00450669	-0.00901348	0.852716	0.974573	-0.0888492	0.0708222	0.000290406	0.00129631	-0.0320014	-0.0640356	0.09556	0.130309	-0.127282	-0.000788945	0.025612	0.0902973	-0.0275056	0.374373	0.516337	-0.0784367	0.0234255	0.00317822	0.00994446	0.040298	0.0806614	0.0966311	0.527079	0.000697571	0.160625	0.0249331	0.0298011	-0.0349258	-0.0698942	0.0688712	0.118065	-0.133153	-0.00663517	0.0361772	0.0834858	-0.0752598	0.0150753	0.0677021	-0.126191	-0.0243287	0.117702	0.147128
	rh_G_front_sup	1699	2712	-0.00251107	-0.00502216	0.917611	0.974573	-0.0848568	0.0748124	0.000213586	0.00129631	-0.0216375	-0.043285	0.259887	0.299869	-0.106497	0.0199264	0.00637564	0.0425042	-0.0191298	0.536702	0.644042	-0.0700608	0.0318013	0.00135297	0.00737983	0.026827	0.0536734	0.268931	0.758372	-0.0262182	0.133565	0.00589228	0.00883843	-0.0232191	-0.0464506	0.226641	0.302188	-0.109667	0.0167653	0.00801796	0.0300673	-0.0500567	0.105961	0.167307	-0.100988	0.00087436	0.0227231	0.0554566
	lh_S_front_inf	1699	2712	-0.00789259	-0.0157857	0.745073	0.974573	-0.0956247	0.0640534	0.000482127	0.00132908	-0.0147912	-0.0295855	0.441254	0.472772	-0.0927812	0.0336102	0.0022009	0.024542	-0.00689948	0.823673	0.915192	-0.0578305	0.0440316	0.00034403	0.00294883	0.00104042	0.00208085	0.965813	0.965813	-0.0777533	0.081915	0.000169626	0.00213458	-0.0441486	-0.0883834	0.021419	0.0514057	-0.151689	-0.0250782	0.0942266	0.1528	-0.0452177	0.144197	0.192321	-0.0961488	0.00571334	0.0155114	0.0500987
	rh_S_front_inf	1699	2712	0.0052889	0.010578	0.827524	0.974573	-0.0692584	0.0904143	0.000327012	0.00129631	-0.0525947	-0.105335	0.00611129	0.01506	-0.168692	-0.0419782	0.19106	0.293982	-0.0579322	0.0613507	0.216532	-0.108863	-0.00700112	0.0403918	0.0550798	0.0130381	0.0260784	0.591168	0.910553	-0.0537693	0.105926	0.00100629	0.00254532	-0.0525966	-0.105339	0.0061094	0.0192929	-0.168696	-0.041982	0.191087	0.266634	-0.065684	0.0338958	0.107039	-0.116615	-0.0147529	0.067352	0.0962171
	lh_G_front_middle	1699	2712	0.00670299	0.0134063	0.782446	0.974573	-0.0664314	0.093244	0.000404302	0.00132908	-0.0535422	-0.107238	0.00524989	0.0138362	-0.170602	-0.0438749	0.204826	0.293982	-0.0602966	0.0514965	0.205986	-0.111228	-0.00936549	0.0474797	0.0618124	0.0139149	0.0278324	0.566459	0.910553	-0.0520171	0.107682	0.00113599	0.00262151	-0.0474744	-0.095056	0.0133537	0.0364191	-0.15838	-0.0317315	0.126842	0.190263	-0.0614259	0.0472792	0.128943	-0.112357	-0.0104948	0.0512002	0.0787696
	rh_G_front_middle	1699	2712	-0.00704382	-0.014088	0.771682	0.974573	-0.0939261	0.0657501	0.000425315	0.00132908	-0.0694778	-0.139292	0.000288278	0.00341065	-0.20278	-0.0758044	0.49698	0.49698	-0.062546	0.0433871	0.200248	-0.113477	-0.0116149	0.0551159	0.0688949	0.0190851	0.0381773	0.431663	0.863326	-0.0416859	0.11804	0.00226572	0.00438526	-0.0485357	-0.097186	0.0114181	0.032623	-0.160517	-0.033855	0.138737	0.20303	-0.0676613	0.0288764	0.0962548	-0.118592	-0.0167303	0.0760795	0.104975
	lh_S_front_middle	1699	2712	-0.0097705	-0.0195419	0.687308	0.974573	-0.0993836	0.0602998	0.000633702	0.00146239	-0.0481518	-0.0964154	0.0120875	0.0242834	-0.159744	-0.0330868	0.13435	0.251905	-0.0384182	0.214701	0.411218	-0.0893493	0.0125128	0.00874189	0.0174838	0.0305695	0.0611676	0.207709	0.733091	-0.0187411	0.141076	0.00904608	0.0123356	-0.0606464	-0.121516	0.0015619	0.00851947	-0.184931	-0.0581016	0.325098	0.381712	-0.0912999	0.00319224	0.0663245	-0.142231	-0.0403689	0.2519	0.2519
	rh_S_front_middle	1699	2712	-0.0540112	-0.10818	0.0258656	0.793429	-0.188248	-0.0281128	0.0817728	0.0817728	-0.0518946	-0.103929	0.00682722	0.0157551	-0.167282	-0.0405769	0.181263	0.293982	0.00212252	0.945349	0.969198	-0.0488085	0.0530536	0.000193666	0.00294883	-0.0254285	-0.0508735	0.294704	0.758372	-0.130759	0.0290122	0.00499227	0.00788253	-0.0374932	-0.0750392	0.050798	0.0952463	-0.13831	-0.0117684	0.0481769	0.0972657	-0.0120768	0.696516	0.720534	-0.0630078	0.0388543	0.000625283	0.0118211
	lh_G_front_inf_Orbital	1699	2712	0.0207824	0.0415737	0.391828	0.974573	-0.0382949	0.121442	0.00281625	0.00412134	-0.00598627	-0.0119728	0.755316	0.755316	-0.0751569	0.0512114	0.000471737	0.0228848	-0.0267717	0.387253	0.516337	-0.0777028	0.0241594	0.00295705	0.00994446	0.0103501	0.0207012	0.669824	0.910553	-0.0591414	0.100544	0.000688714	0.00229571	-0.0220043	-0.0440192	0.251891	0.314864	-0.107232	0.0191933	0.00672742	0.0300104	-0.0323583	0.296008	0.328898	-0.0832893	0.0185728	0.00505442	0.0433236
	rh_G_front_inf_Orbital	1699	2712	0.0415532	0.0831782	0.0866667	0.793429	0.00320612	0.16315	0.0281217	0.0296018	-0.039375	-0.0788111	0.0402319	0.0670531	-0.142091	-0.0155312	0.0588491	0.141238	-0.0809725	0.00892114	0.0764669	-0.131904	-0.0300414	0.158158	0.174586	0.0461418	0.092382	0.0570638	0.527079	0.0123777	0.172386	0.0427935	0.0466838	-0.0114413	-0.0228842	0.55141	0.612678	-0.0860743	0.040306	0.00125339	0.0107434	-0.0576164	0.0627779	0.142883	-0.108547	-0.00668534	0.0395139	0.0640766
	lh_S_precentral_inf_part	1699	2712	-0.00267646	-0.00535294	0.912206	0.974573	-0.0851876	0.0744817	0.000219146	0.00129631	-0.0364497	-0.072948	0.0575974	0.086396	-0.136214	-0.00968207	0.042963	0.117816	-0.0337894	0.275162	0.446689	-0.0847205	0.0171416	0.00577071	0.0133358	0.0162256	0.0324556	0.503816	0.910553	-0.0473996	0.112311	0.00155463	0.00325371	-0.0194849	-0.0389772	0.31033	0.372396	-0.102183	0.0242287	0.00462101	0.0252055	-0.0357144	0.248738	0.286493	-0.0866455	0.0152167	0.00687565	0.0458377
	rh_S_precentral_inf_part	1699	2712	0.00811818	0.0162369	0.73805	0.974573	-0.0636025	0.0960763	0.000498369	0.00132908	-0.0198153	-0.0396383	0.302194	0.342107	-0.102845	0.0235684	0.00485865	0.0364399	-0.0279362	0.36694	0.516337	-0.0788673	0.0229948	0.00331482	0.00994446	0.00811408	0.0162287	0.738177	0.910553	-0.0636107	0.0960681	0.00049807	0.00213458	-0.0375801	-0.0752133	0.0502637	0.0952463	-0.138484	-0.0119421	0.0486328	0.0972657	-0.045712	0.139863	0.192321	-0.0966431	0.00521903	0.0161445	0.0500987
	lh_S_precentral_sup_part	1699	2712	-0.0362717	-0.0725912	0.134866	0.793429	-0.15253	0.007348	0.016678	0.0188808	-0.0772946	-0.155053	5.44046e-05	0.000857832	-0.218614	-0.0914924	0.338914	0.391264	-0.0411615	0.183737	0.368396	-0.0920925	0.00976959	0.0110752	0.020766	0.0110999	0.0222012	0.647465	0.910553	-0.0576427	0.102045	0.000766437	0.00229931	-0.0685927	-0.137509	0.000344638	0.00798812	-0.200989	-0.0740293	0.484595	0.484595	-0.079801	0.00995963	0.0677021	-0.130732	-0.0288699	0.149196	0.168901
	rh_S_precentral_sup_part	1699	2712	-0.0165044	-0.0330134	0.496513	0.974573	-0.112869	0.0468425	0.00161369	0.00276632	-0.0575604	-0.115312	0.00268709	0.00848554	-0.178704	-0.0519204	0.269395	0.367357	-0.0411182	0.184198	0.368396	-0.0920493	0.00981288	0.0110345	0.020766	0.00902239	0.0180455	0.710124	0.910553	-0.0617951	0.0978861	0.000568693	0.00227477	-0.0286829	-0.0573894	0.135233	0.184409	-0.120623	0.00584448	0.0168822	0.0595844	-0.0377134	0.223232	0.262625	-0.0886445	0.0132177	0.00821689	0.0465273
	lh_G_precentral	1699	2712	-0.0231758	-0.0463641	0.339589	0.974573	-0.126241	0.0335129	0.00379815	0.0051793	-0.0867966	-0.174251	5.74552e-06	0.000218578	-0.237911	-0.110591	0.181197	0.293982	-0.0638356	0.0392446	0.200248	-0.114767	-0.0129045	0.0599131	0.0714069	0.00993996	0.0198809	0.682178	0.910553	-0.0599611	0.0997229	0.000649352	0.00229183	-0.0538674	-0.107891	0.00498055	0.0172839	-0.171257	-0.0445259	0.209683	0.279578	-0.0638599	0.0391698	0.117509	-0.114791	-0.0129288	0.0600067	0.0878147
	rh_G_precentral	1699	2712	-0.0162454	-0.0324952	0.503296	0.974573	-0.11235	0.04736	0.00155875	0.00275074	-0.0621728	-0.124587	0.00118342	0.00599446	-0.188013	-0.06116	0.354283	0.391264	-0.0460063	0.137331	0.335198	-0.0969373	0.00492481	0.0165317	0.0261027	-0.0165653	-0.0331352	0.494925	0.910553	-0.112991	0.0467208	0.00162685	0.00325371	-0.0307025	-0.0614339	0.109809	0.160696	-0.124675	0.00180756	0.0218256	0.062703	-0.0141453	0.647792	0.681886	-0.0650764	0.0367858	0.000788076	0.0118211
	lh_G_postcentral	1699	2712	0.00355976	0.00711956	0.883413	0.974573	-0.0727155	0.0869547	0.000251206	0.00129631	-0.0604048	-0.121031	0.00163111	0.00618311	-0.184444	-0.0576177	0.320571	0.391264	-0.0640382	0.0386252	0.200248	-0.114969	-0.0131071	0.0606958	0.0714069	-0.0124059	-0.0248136	0.609285	0.910553	-0.10466	0.0550327	0.000921368	0.00253162	-0.0618407	-0.123919	0.00125771	0.00838477	-0.187343	-0.0604946	0.347853	0.388487	-0.0495132	0.109806	0.168933	-0.100444	0.00141782	0.0217929	0.0554566
	rh_G_postcentral	1699	2712	0.0293771	0.0587796	0.226009	0.974573	-0.0211234	0.138683	0.00790972	0.00968537	-0.0770713	-0.154602	5.71888e-05	0.000857832	-0.218161	-0.0910438	0.343187	0.391264	-0.10661	0.000575209	0.0172563	-0.157541	-0.0556789	0.430904	0.430904	0.0124591	0.0249202	0.607748	0.910553	-0.0549263	0.104767	0.000928262	0.00253162	-0.0619332	-0.124105	0.00123661	0.00838477	-0.187529	-0.0606798	0.349639	0.388487	-0.0744723	0.0161665	0.0677021	-0.125403	-0.0235413	0.11276	0.143949
	lh_S_postcentral	1699	2712	0.0472171	0.0945396	0.0515032	0.793429	0.0145273	0.174552	0.0470042	0.0478009	-0.0536069	-0.107368	0.00519526	0.0138362	-0.170732	-0.0440045	0.205788	0.293982	-0.100911	0.00111815	0.0182891	-0.151842	-0.0499795	0.360119	0.372537	-0.00646398	-0.0129282	0.790018	0.929433	-0.0927657	0.0669092	0.000390147	0.00213458	-0.0609495	-0.122126	0.00147886	0.00851947	-0.185543	-0.058709	0.330817	0.381712	-0.0545611	0.0780545	0.161492	-0.105492	-0.00363003	0.0317961	0.0596176
	rh_S_postcentral	1699	2712	0.035633	0.0713113	0.141881	0.793429	-0.00862428	0.151247	0.015612	0.0180138	-0.0858395	-0.172315	7.28592e-06	0.000218578	-0.235965	-0.108666	0.194636	0.293982	-0.121699	8.48171e-05	0.00508903	-0.17263	-0.0707683	0.377046	0.383437	-0.0045333	-0.0090667	0.851857	0.946508	-0.0889024	0.070769	0.000291586	0.00213458	-0.09493	-0.190721	6.8967e-07	4.13802e-05	-0.254476	-0.126967	0.0910368	0.151728	-0.0906833	0.00340404	0.0663245	-0.141614	-0.0397523	0.245589	0.249752
	lh_G_and_S_subcentral	1699	2712	0.00304261	0.00608525	0.900254	0.974573	-0.0737496	0.0859201	0.000231942	0.00129631	-0.0645543	-0.129378	0.00075834	0.00582279	-0.192824	-0.0659326	0.401509	0.415354	-0.0676868	0.0288162	0.192108	-0.118618	-0.0167557	0.0761972	0.087903	0.0245695	0.0491538	0.311329	0.758372	-0.0307285	0.129036	0.00450223	0.00730091	-0.0643668	-0.129001	0.000785796	0.00798812	-0.192446	-0.0655569	0.397729	0.418663	-0.0890304	0.00403647	0.0663245	-0.139961	-0.0380993	0.229099	0.236998
	rh_G_and_S_subcentral	1699	2712	-0.0401772	-0.0804194	0.0976358	0.793429	-0.160382	-0.000456296	0.024643	0.0268833	-0.0644305	-0.129129	0.000776372	0.00582279	-0.192574	-0.0656844	0.399012	0.415354	-0.024321	0.432182	0.540227	-0.0752521	0.0266101	0.0023154	0.0095623	-0.00809563	-0.0161918	0.738751	0.910553	-0.0960311	0.0636475	0.000496723	0.00213458	-0.053619	-0.107392	0.00518516	0.0172839	-0.170756	-0.0440286	0.205967	0.279578	-0.0455746	0.141058	0.192321	-0.0965057	0.00535642	0.0159663	0.0500987
	lh_S_central	1699	2712	-0.0180467	-0.0360993	0.45715	0.974573	-0.115959	0.0437609	0.00197899	0.00312471	-0.0426606	-0.0853989	0.026227	0.046283	-0.148696	-0.0221019	0.0818261	0.181836	-0.0246378	0.426209	0.540227	-0.0755689	0.0262932	0.00239058	0.0095623	0.015377	0.0307576	0.526391	0.910553	-0.0490954	0.110611	0.00138678	0.00308174	-0.0227562	-0.0455243	0.23604	0.303845	-0.108739	0.0176903	0.00750261	0.0300104	-0.0381384	0.21806	0.261671	-0.0890694	0.0127927	0.00853	0.0465273
	rh_S_central	1699	2712	-0.0154772	-0.0309581	0.523699	0.974573	-0.110811	0.0488951	0.0014057	0.00263569	-0.0373773	-0.0748069	0.0515183	0.0835432	-0.138077	-0.0115367	0.0475741	0.118935	-0.0219163	0.479068	0.586614	-0.0728474	0.0290147	0.00181112	0.00905558	-0.00194891	-0.00389782	0.936011	0.965813	-0.0837322	0.0759366	0.000195655	0.00213458	-0.00595995	-0.0119201	0.756358	0.810384	-0.0751042	0.051264	0.000469433	0.00563319	-0.00401112	0.896929	0.896929	-0.0549422	0.04692	0.000243711	0.0118211
	lh_G_pariet_inf_Supramar	1699	2712	0.0137773	0.0275573	0.570303	0.974573	-0.052292	0.107407	0.00111468	0.00215744	-0.0294488	-0.0589231	0.125104	0.163179	-0.12216	0.00431361	0.0186308	0.0745233	-0.0432355	0.162618	0.350003	-0.0941665	0.00769559	0.0131823	0.023263	0.00756132	0.0151231	0.755424	0.910553	-0.0647156	0.0949617	0.000459165	0.00213458	-0.0357392	-0.0715241	0.0626469	0.113903	-0.134787	-0.00826149	0.0396811	0.0850308	-0.0433159	0.161838	0.206602	-0.094247	0.00761515	0.0132706	0.0500987
	rh_G_pariet_inf_Supramar	1699	2712	0.0411247	0.0823191	0.0899706	0.793429	0.0023498	0.162288	0.0269971	0.0289254	-0.0589312	-0.118068	0.00211803	0.00706009	-0.181469	-0.0546659	0.293546	0.384608	-0.100148	0.00121928	0.0182891	-0.151079	-0.0492164	0.35094	0.36941	-0.0131223	-0.0262469	0.588773	0.910553	-0.106095	0.053601	0.00101813	0.00254532	-0.0649854	-0.130246	0.000698532	0.00798812	-0.193696	-0.0667967	0.410238	0.424384	-0.0519541	0.0933681	0.162064	-0.102885	-0.00102301	0.026237	0.0554566
	lh_G_parietal_sup	1699	2712	0.0353163	0.0706766	0.145462	0.793429	-0.00925715	0.15061	0.0151054	0.0178197	-0.0458493	-0.0917952	0.0168795	0.0326701	-0.15511	-0.0284803	0.110037	0.220074	-0.0812124	0.00872076	0.0764669	-0.132144	-0.0302814	0.160037	0.174586	0.0136195	0.0272416	0.574727	0.910553	-0.0526073	0.10709	0.00109068	0.00261763	-0.0312242	-0.0624788	0.103897	0.159841	-0.125722	0.000764715	0.0232854	0.0635055	-0.0448547	0.147446	0.192321	-0.0957858	0.00607638	0.0150602	0.0500987
	rh_G_parietal_sup	1699	2712	0.00565694	0.0113141	0.815731	0.974573	-0.0685226	0.0911507	0.000345682	0.00129631	-0.0310054	-0.0620405	0.106345	0.141793	-0.125283	0.0012021	0.0226634	0.0849878	-0.0366723	0.236272	0.429585	-0.0876034	0.0142588	0.00749213	0.0160546	0.022487	0.0449853	0.354146	0.786992	-0.0348892	0.12486	0.00348805	0.00615538	-0.0547031	-0.10957	0.00434469	0.0162926	-0.172942	-0.046199	0.222472	0.289829	-0.0772485	0.012603	0.0677021	-0.12818	-0.0263175	0.130863	0.15499
	lh_S_intrapariet_and_P_trans	1699	2712	0.0353424	0.070729	0.145164	0.793429	-0.00920488	0.150663	0.0151467	0.0178197	-0.0105098	-0.0210207	0.584279	0.594182	-0.0842096	0.0421681	0.00106639	0.0228848	-0.0458673	0.138522	0.335198	-0.0967984	0.00506377	0.0163478	0.0261027	0.00745378	0.014908	0.758794	0.910553	-0.0649306	0.0947465	0.000451931	0.00213458	-0.0334107	-0.0668588	0.0818141	0.136357	-0.130111	-0.00360634	0.0303275	0.072786	-0.0408771	0.186784	0.23348	-0.0918082	0.010054	0.0108104	0.0498943
	rh_S_intrapariet_and_P_trans	1699	2712	0.00961834	0.0192376	0.691926	0.974573	-0.0606039	0.099079	0.000619948	0.00146239	-0.0449069	-0.0899044	0.0192782	0.0350513	-0.153214	-0.026595	0.101056	0.216548	-0.0545557	0.0780837	0.24658	-0.105487	-0.00362466	0.0317837	0.0454053	-0.00478027	-0.00956064	0.843887	0.946508	-0.0893966	0.0702753	0.000302751	0.00213458	-0.0515105	-0.103158	0.00725124	0.0217537	-0.166508	-0.0398081	0.176024	0.251462	-0.0467758	0.130876	0.192321	-0.0977069	0.00415525	0.0175822	0.0502349
	lh_G_oc_temp_lat_fusifor	1699	2712	0.00116322	0.00232644	0.961781	0.974573	-0.0775078	0.0821606	0.000172944	0.00129631	-0.0368545	-0.0737591	0.0548751	0.0844232	-0.137027	-0.0104914	0.0449287	0.117816	-0.0380344	0.219316	0.411218	-0.0889655	0.0128966	0.00845247	0.0174838	-0.0240881	-0.0481902	0.32091	0.758372	-0.128071	0.0316902	0.00424683	0.00707806	-0.0328698	-0.0657751	0.0868878	0.140899	-0.129025	-0.0025249	0.0284387	0.0710967	-0.00878885	0.776532	0.789693	-0.0597199	0.0421422	0.000429151	0.0118211
	rh_G_oc_temp_lat_fusifor	1699	2712	-0.0388517	-0.0777622	0.109223	0.793429	-0.157717	0.00219252	0.021641	0.0240455	-0.0339556	-0.0679503	0.0769495	0.109928	-0.131205	-0.00469553	0.0323337	0.102107	0.00490269	0.874192	0.936635	-0.0460284	0.0558338	0.000271313	0.00294883	0.0288512	0.0577264	0.234435	0.740323	-0.0221741	0.137627	0.00744982	0.0105325	-0.045062	-0.0902156	0.0188641	0.0471602	-0.153526	-0.0269053	0.102496	0.161835	-0.0739517	0.0169255	0.0677021	-0.124883	-0.0230207	0.109574	0.142923
	lh_G_temporal_middle	1699	2712	-0.0262095	-0.052437	0.280115	0.974573	-0.132326	0.027452	0.00547847	0.00730462	-0.0611501	-0.122529	0.00142619	0.00618311	-0.185948	-0.0591108	0.334622	0.391264	-0.035011	0.25818	0.446689	-0.085942	0.0159201	0.0064519	0.0143376	0.0271877	0.0543955	0.262542	0.758372	-0.0254976	0.134289	0.00614661	0.00899504	-0.0549945	-0.110156	0.00414092	0.0162926	-0.173529	-0.0467823	0.227033	0.289829	-0.0822444	0.00790408	0.0677021	-0.133175	-0.0313134	0.168282	0.18358
	rh_G_temporal_middle	1699	2712	0.00902759	0.0180559	0.709965	0.974573	-0.0617847	0.0978965	0.000569122	0.00142281	-0.0402885	-0.0806424	0.0358145	0.0613962	-0.143927	-0.0173579	0.0646592	0.149213	-0.0493381	0.111069	0.302914	-0.100269	0.00159295	0.0215001	0.0330771	0.0196592	0.039326	0.417934	0.863326	-0.040539	0.119191	0.00243992	0.00457484	-0.0676186	-0.135547	0.000418487	0.00798812	-0.199019	-0.0720759	0.464354	0.472224	-0.0873837	0.00477079	0.0663245	-0.138315	-0.0364526	0.213307	0.224533
	lh_G_and_S_cingul_Ant	1699	2712	-0.01591	-0.0318239	0.512154	0.974573	-0.111678	0.0480304	0.00149014	0.00270934	-0.0590046	-0.118215	0.00209094	0.00706009	-0.181617	-0.0548128	0.294866	0.384608	-0.0431619	0.163335	0.350003	-0.094093	0.00776915	0.0131021	0.023263	0.00948489	0.0189706	0.695986	0.910553	-0.0608706	0.0988119	0.000608113	0.00228042	-0.0422762	-0.084628	0.0276112	0.0613581	-0.147923	-0.0213331	0.0788318	0.139115	-0.0517866	0.0944293	0.162064	-0.102718	-0.000855483	0.0259095	0.0554566
	rh_G_and_S_cingul_Ant	1699	2712	-0.0228211	-0.0456542	0.347036	0.974573	-0.12553	0.0342215	0.00363552	0.00507282	-0.0534789	-0.107111	0.00530386	0.0138362	-0.170474	-0.0437481	0.203888	0.293982	-0.0307049	0.321376	0.484861	-0.0816359	0.0202262	0.00432631	0.011799	-0.0025126	-0.00502521	0.917562	0.965813	-0.0848598	0.0748094	0.000213636	0.00213458	-0.0592258	-0.11866	0.00201116	0.00972714	-0.182064	-0.055256	0.298864	0.358637	-0.0567826	0.0666787	0.142883	-0.107714	-0.00585155	0.0372701	0.0640766
	lh_G_and_S_cingul_Mid_Ant	1699	2712	-0.0265777	-0.0531741	0.273409	0.974573	-0.133065	0.0267164	0.00572196	0.00730463	-0.0571085	-0.114404	0.00290331	0.00870994	-0.177792	-0.0510153	0.261657	0.365103	-0.0305867	0.323241	0.484861	-0.0815178	0.0203443	0.00427809	0.011799	0.0108238	0.0216489	0.655662	0.910553	-0.0581945	0.101492	0.000736924	0.00229931	-0.0352931	-0.0706302	0.0660004	0.116471	-0.133891	-0.00736954	0.0377267	0.083837	-0.046132	0.13626	0.192321	-0.0970631	0.00479907	0.0166996	0.0500987
	rh_G_and_S_cingul_Mid_Ant	1699	2712	-0.0124819	-0.0249658	0.607093	0.974573	-0.104812	0.0548808	0.000931221	0.00192666	-0.0369018	-0.0738538	0.0545644	0.0844232	-0.137122	-0.0105858	0.0451628	0.117816	-0.024436	0.430009	0.540227	-0.075367	0.0264951	0.00234243	0.0095623	-0.00168034	-0.00336069	0.944813	0.965813	-0.083195	0.0764736	0.000187595	0.00213458	-0.0588632	-0.117931	0.00214344	0.00972714	-0.181332	-0.0545296	0.292324	0.357948	-0.057251	0.0644637	0.142883	-0.108182	-0.0063199	0.0385173	0.0640766
	lh_G_and_S_cingul_Mid_Post	1699	2712	-0.00528107	-0.0105623	0.827776	0.974573	-0.0903986	0.069274	0.000326624	0.00129631	-0.0493771	-0.0988747	0.0100648	0.0215675	-0.162211	-0.0355386	0.148691	0.270348	-0.0441361	0.15404	0.350003	-0.0950672	0.00679494	0.0142002	0.0243432	-0.00131656	-0.00263312	0.956748	0.965813	-0.0824674	0.0772011	0.000177173	0.00213458	-0.063461	-0.127178	0.000931947	0.00798812	-0.190615	-0.0637414	0.379603	0.414113	-0.0622298	0.0444571	0.12702	-0.113161	-0.0112988	0.0539876	0.0809814
	rh_G_and_S_cingul_Mid_Post	1699	2712	-0.0021641	-0.00432821	0.928963	0.974573	-0.0841627	0.0755063	0.000202346	0.00129631	-0.0359172	-0.0718808	0.0613487	0.0897786	-0.135144	-0.00861739	0.0404835	0.117816	-0.0337686	0.275458	0.446689	-0.0846996	0.0171625	0.00575966	0.0133358	0.0210102	0.0420297	0.386655	0.828546	-0.0378396	0.121899	0.00289871	0.00527037	-0.0307466	-0.0615223	0.109299	0.160696	-0.124764	0.00171933	0.0219461	0.062703	-0.0517696	0.0945372	0.162064	-0.102701	-0.000838543	0.0258766	0.0554566
	lh_G_cingul_Post_dorsal	1699	2712	-0.0112582	-0.0225179	0.642785	0.974573	-0.102362	0.0573263	0.000783845	0.00167967	-0.0621021	-0.124444	0.00119889	0.00599446	-0.187871	-0.0610183	0.352911	0.391264	-0.0509234	0.100051	0.300152	-0.101855	7.62147e-06	0.0242758	0.0355255	0.0164336	0.0328717	0.498362	0.910553	-0.046984	0.112727	0.0015985	0.00325371	-0.0639204	-0.128103	0.000854941	0.00798812	-0.191543	-0.0646621	0.388766	0.416535	-0.0804428	0.00937808	0.0677021	-0.131374	-0.0295117	0.154063	0.171181
	rh_G_cingul_Post_dorsal	1699	2712	0.0292314	0.0584877	0.228322	0.974573	-0.0214146	0.13839	0.00777983	0.00968537	-0.0524283	-0.105001	0.006275	0.01506	-0.168357	-0.0416452	0.188703	0.293982	-0.0817161	0.00831318	0.0764669	-0.132647	-0.0307851	0.164028	0.175744	0.0404617	0.0809897	0.0952818	0.527079	0.00102475	0.160955	0.0253309	0.0298011	-0.0383812	-0.076819	0.0455534	0.0911068	-0.140094	-0.0135439	0.0530024	0.100421	-0.0788838	0.0108465	0.0677021	-0.129815	-0.0279528	0.14242	0.164331
	lh_G_cingul_Post_ventral	1699	2712	-0.0213035	-0.0426166	0.380058	0.974573	-0.122487	0.0372537	0.00300804	0.0042972	-0.0231258	-0.0462641	0.228512	0.268838	-0.10948	0.0169516	0.00791173	0.0456808	-0.00182326	0.953045	0.969198	-0.0527543	0.0491078	0.000186679	0.00294883	0.049454	0.0990292	0.0413766	0.527079	0.0189995	0.179059	0.0568264	0.0568264	-0.00274562	-0.00549126	0.886345	0.898926	-0.0686736	0.0576911	0.000254769	0.00546493	-0.05224	0.0915791	0.162064	-0.103171	-0.00130892	0.026804	0.0554566
	rh_G_cingul_Post_ventral	1699	2712	-0.00826862	-0.0165378	0.733379	0.974573	-0.0963774	0.0633017	0.000509481	0.00132908	-0.0141671	-0.0283371	0.460769	0.48502	-0.0915316	0.0348575	0.00198599	0.024542	-0.00589926	0.848901	0.926074	-0.0568303	0.0450318	0.000305599	0.00294883	0.0473929	0.0948925	0.0506383	0.527079	0.0148789	0.174906	0.0477235	0.0488055	-0.00387097	-0.007742	0.840296	0.869272	-0.0709248	0.0554408	0.000316493	0.00546493	-0.0512995	0.0975698	0.162616	-0.102231	-0.000368393	0.0249766	0.0554566
	lh_S_orbital_med_olfact	1699	2712	-0.00733093	-0.0146622	0.76265	0.974573	-0.0945006	0.0651761	0.000443797	0.00132908	-0.0256207	-0.0512581	0.182142	0.223031	-0.114481	0.0119652	0.0112228	0.0561142	-0.0182952	0.554617	0.65249	-0.0692263	0.0326359	0.001238	0.00737983	0.00184166	0.00368332	0.939525	0.965813	-0.076151	0.0835177	0.000192398	0.00213458	-0.0430925	-0.0862651	0.0247438	0.0571012	-0.149564	-0.0229657	0.0852913	0.146214	-0.0449608	0.14649	0.192321	-0.0958919	0.00597024	0.0151909	0.0500987
	rh_S_orbital_med_olfact	1699	2712	0.017726	0.0354575	0.465189	0.974573	-0.0444017	0.115317	0.00189734	0.00307677	-0.0160756	-0.0321553	0.402612	0.439213	-0.0953535	0.0310429	0.00271095	0.024542	-0.0338048	0.274944	0.446689	-0.0847359	0.0171263	0.00577886	0.0133358	0.0262036	0.0524252	0.280223	0.758372	-0.0274637	0.132314	0.00547465	0.00842253	-0.0321649	-0.0643632	0.0938758	0.148225	-0.12761	-0.00111589	0.0261256	0.0681538	-0.0583856	0.0593483	0.142883	-0.109317	-0.00745457	0.0416802	0.0658108
	lh_G_orbital	1699	2712	-0.0105899	-0.0211809	0.66264	0.974573	-0.101024	0.0586621	0.000712741	0.00158387	-0.0604172	-0.121055	0.0016275	0.00618311	-0.184469	-0.0576425	0.320802	0.391264	-0.0499006	0.107055	0.302914	-0.100832	0.00103049	0.0224525	0.0336787	0.0473785	0.0948636	0.0507087	0.527079	0.0148501	0.174877	0.0476642	0.0488055	-0.0384792	-0.0770155	0.0450034	0.0911068	-0.140291	-0.01374	0.0535578	0.100421	-0.0859123	0.00552704	0.0663245	-0.136843	-0.0349812	0.199748	0.214016
	rh_G_orbital	1699	2712	-0.00506664	-0.0101334	0.834666	0.974573	-0.0899696	0.0697027	0.000316196	0.00129631	-0.0603445	-0.120909	0.00164883	0.00618311	-0.184322	-0.0574968	0.319444	0.391264	-0.0553512	0.0738398	0.246133	-0.106282	-0.00442014	0.0336615	0.0469695	0.0407187	0.081505	0.0931938	0.527079	0.00153843	0.161472	0.0259663	0.0299612	-0.0300399	-0.060107	0.117697	0.164228	-0.123346	0.00313191	0.0200839	0.062703	-0.0707902	0.0222415	0.0834055	-0.121721	-0.0198592	0.0916113	0.122148
	lh_G_rectus	1699	2712	-0.00816422	-0.016329	0.736619	0.974573	-0.0961684	0.0635104	0.000501746	0.00132908	-0.0686447	-0.137614	0.000341065	0.00341065	-0.201094	-0.0741335	0.485675	0.493907	-0.0605884	0.0503776	0.205986	-0.111519	-0.00965732	0.0484197	0.0618124	0.00517995	0.01036	0.831024	0.946508	-0.0694762	0.0901963	0.000321667	0.00213458	-0.0226608	-0.0453332	0.238012	0.303845	-0.108548	0.0178811	0.00740005	0.0300104	-0.0278447	0.368513	0.394835	-0.0787757	0.0230864	0.00328534	0.0390421
	rh_G_rectus	1699	2712	-0.018838	-0.0376827	0.437653	0.974573	-0.117545	0.0421798	0.00219425	0.00337577	-0.0516003	-0.103338	0.00715	0.0158889	-0.166689	-0.039988	0.17724	0.293982	-0.032806	0.289376	0.456909	-0.0837371	0.0181251	0.00526949	0.0133358	-0.0289661	-0.0579566	0.232575	0.740323	-0.137858	0.0219445	0.00754826	0.0105325	-0.0585358	-0.117273	0.00226967	0.00972714	-0.180671	-0.0538738	0.286477	0.357948	-0.0296285	0.338631	0.369416	-0.0805596	0.0213025	0.00390421	0.0390421
	lh_S_circular_insula_ant	1699	2712	0.0422608	0.0845971	0.0814255	0.793429	0.00462024	0.164574	0.0300643	0.031101	-0.0164166	-0.0328377	0.392703	0.436336	-0.0960366	0.0303612	0.00286323	0.024542	-0.058704	0.057975	0.216532	-0.109635	-0.00777297	0.0426046	0.0568061	0.0368871	0.0738245	0.128363	0.641817	-0.00611831	0.153767	0.0177635	0.0217513	-0.0134041	-0.0268106	0.485271	0.549364	-0.0900039	0.0363826	0.00174919	0.0131189	-0.0503088	0.104214	0.167307	-0.10124	0.000622274	0.0231658	0.0554566
	rh_S_circular_insula_ant	1699	2712	-0.00174789	-0.00349579	0.942599	0.974573	-0.0833301	0.0763386	0.000189593	0.00129631	-0.0109145	-0.0218302	0.569889	0.58954	-0.0850196	0.0413592	0.00114424	0.0228848	-0.00916699	0.767189	0.868515	-0.0600981	0.0417641	0.000448378	0.00336283	0.0439212	0.0879272	0.0701308	0.527079	0.00793888	0.167915	0.0350626	0.0389584	0.00461014	0.00922038	0.810334	0.852983	-0.0539628	0.0724036	0.000364329	0.00546493	-0.0393393	0.203911	0.249687	-0.0902703	0.0115918	0.00947207	0.0473604
	lh_S_circular_insula_inf	1699	2712	-0.0176094	-0.0352243	0.46813	0.974573	-0.115083	0.0446346	0.00186844	0.00307677	-0.0453778	-0.0908493	0.0180447	0.0338337	-0.154161	-0.0275371	0.105475	0.218224	-0.0277978	0.369319	0.516337	-0.0787289	0.0231333	0.00327035	0.00994446	0.0425499	0.085177	0.0793588	0.527079	0.0051982	0.165156	0.0308896	0.0349694	-0.0144268	-0.0288567	0.452589	0.522218	-0.0920517	0.0343384	0.002073	0.01382	-0.0570035	0.0656266	0.142883	-0.107935	-0.0060724	0.037854	0.0640766
	rh_S_circular_insula_inf	1699	2712	-0.00242392	-0.00484785	0.920461	0.974573	-0.0846824	0.0749867	0.000210709	0.00129631	-0.0481215	-0.0963546	0.0121417	0.0242834	-0.159683	-0.0330263	0.134008	0.251905	-0.0457348	0.139666	0.335198	-0.0966659	0.00519629	0.0161741	0.0261027	0.0474581	0.0950232	0.0503211	0.527079	0.0150091	0.175037	0.0479921	0.0488055	-0.0203591	-0.0407267	0.289114	0.354017	-0.103935	0.0224814	0.00527363	0.0263681	-0.0678557	0.0284196	0.0962548	-0.118787	-0.0169246	0.0769817	0.104975
	lh_G_cuneus	1699	2712	-0.00550954	-0.0110192	0.820449	0.974573	-0.0908558	0.0688173	0.000338088	0.00129631	-0.0324646	-0.0649635	0.0908512	0.126769	-0.128212	-0.00171502	0.0270892	0.0902973	-0.0269665	0.383809	0.516337	-0.0778975	0.0239646	0.00301435	0.00994446	0.0341083	0.0682564	0.159754	0.68466	-0.0116707	0.148183	0.0133012	0.0169802	-0.0191591	-0.0383252	0.318493	0.374698	-0.10153	0.0248799	0.00439688	0.0252055	-0.053283	0.0852852	0.162064	-0.104214	-0.00235192	0.0289598	0.0579196
	rh_G_cuneus	1699	2712	-0.0207371	-0.0414832	0.39286	0.974573	-0.121352	0.0383852	0.00280013	0.00412134	-0.0235244	-0.0470619	0.220588	0.264706	-0.110279	0.0161549	0.00837481	0.0456808	-0.00278867	0.928238	0.969198	-0.0537197	0.0481424	0.000210105	0.00294883	0.0329376	0.065911	0.174594	0.698376	-0.0140098	0.145832	0.0117334	0.0153044	-0.00243994	-0.0048799	0.898926	0.898926	-0.0680622	0.0583023	0.000240057	0.00546493	-0.0353895	0.253069	0.286493	-0.0863205	0.0155416	0.00667694	0.0458377
	lh_Lat_Fis_post	1699	2712	-0.0137363	-0.0274751	0.571452	0.974573	-0.107324	0.052374	0.00110839	0.00215744	-0.0266653	-0.0533495	0.164946	0.206183	-0.116576	0.00987727	0.0129333	0.0585875	-0.0129345	0.676146	0.780169	-0.0638655	0.0379966	0.000688596	0.00459064	0.0464544	0.0930092	0.0553979	0.527079	0.0130026	0.173016	0.043985	0.0471268	-0.0106644	-0.02133	0.578762	0.631377	-0.084519	0.0418591	0.00109554	0.0107434	-0.0571526	0.0649236	0.142883	-0.108084	-0.00622158	0.0382527	0.0640766
	rh_Lat_Fis_post	1699	2712	0.000773733	0.00154747	0.974573	0.974573	-0.0782867	0.0813816	0.000162624	0.00129631	-0.0623976	-0.125039	0.00113547	0.00599446	-0.188467	-0.0616103	0.358658	0.391264	-0.0632525	0.041074	0.200248	-0.114184	-0.0123214	0.0577051	0.0706593	0.0347885	0.0696192	0.151581	0.68466	-0.0103115	0.14955	0.0142928	0.017866	-0.0410591	-0.0821876	0.0324157	0.0694622	-0.145476	-0.0188991	0.0698992	0.12709	-0.0758848	0.0142558	0.0677021	-0.126816	-0.0249538	0.121734	0.149062
Cortical Volume	lh_S_front_sup	1699	2712	-0.0142679	-0.0285387	0.556652	0.857648	-0.108389	0.0513116	0.00119241	0.00311064	-0.0567763	-0.113736	0.00307224	0.02928	-0.177122	-0.0503501	0.256042	0.279319	-0.0425685	0.1692	0.664729	-0.0934996	0.00836254	0.0124698	0.0155873	0.035391	0.0708264	0.14461	0.690006	-0.00910775	0.150761	0.0152237	0.0182685	-0.0352358	-0.0705153	0.0664417	0.147648	-0.133776	-0.00725497	0.0374814	0.0661437	-0.0706562	0.0224959	0.134975	-0.121587	-0.0197251	0.0909011	0.106942
	rh_S_front_sup	1699	2712	-0.0325857	-0.065206	0.179249	0.801176	-0.145125	0.0147129	0.0112947	0.0135536	-0.0208056	-0.0416203	0.278663	0.379995	-0.10483	0.0215889	0.00563763	0.0198975	0.0117886	0.703411	0.913326	-0.0391425	0.0627197	0.000605246	0.00226967	0.0207065	0.041422	0.393558	0.843339	-0.0384464	0.12129	0.00278928	0.00507142	-0.0230598	-0.0461318	0.229845	0.299798	-0.109347	0.0170837	0.00783718	0.0311752	-0.0437734	0.157453	0.255329	-0.0947044	0.0071577	0.0137824	0.0335111
	lh_G_front_sup	1699	2712	-0.0296892	-0.0594046	0.221112	0.801176	-0.139309	0.0204999	0.0081943	0.0109257	-0.0227746	-0.045561	0.235662	0.344872	-0.108776	0.0176537	0.00752247	0.0225674	0.00691942	0.823172	0.949814	-0.0440117	0.0578505	0.00034484	0.00218793	0.0391338	0.0783276	0.106671	0.690006	-0.00162887	0.158284	0.0222525	0.024725	-0.0409275	-0.0819237	0.0329759	0.0965937	-0.145211	-0.0186358	0.0689818	0.0983256	-0.0801042	0.00968102	0.0829802	-0.131035	-0.0291731	0.151482	0.168313
	rh_G_front_sup	1699	2712	-0.0158058	-0.0316156	0.514919	0.838055	-0.11147	0.0482384	0.00146941	0.00331451	-0.0201141	-0.0402364	0.294958	0.384728	-0.103444	0.022971	0.00508295	0.0197359	-0.0043097	0.889304	0.97015	-0.0552408	0.0466214	0.000252649	0.00218793	0.0118034	0.0236085	0.626774	0.913554	-0.0562367	0.103454	0.00084663	0.00241894	-0.0100411	-0.0200833	0.601152	0.636977	-0.0832715	0.043105	0.000982334	0.011788	-0.0218455	0.48049	0.534629	-0.0727765	0.0290856	0.0017979	0.013354
	lh_S_front_inf	1699	2712	-0.00928132	-0.0185634	0.702196	0.923367	-0.0984044	0.0612775	0.000590461	0.0021452	0.00875929	0.0175193	0.648386	0.70733	-0.0456675	0.080706	0.000782527	0.00782527	0.0180411	0.560129	0.800184	-0.03289	0.0689722	0.00120481	0.00380465	0.00403681	0.00807368	0.867924	0.961914	-0.0717617	0.0879091	0.000270292	0.00193525	-0.0407355	-0.0815387	0.0338078	0.0965937	-0.144826	-0.0182519	0.0676602	0.0983256	-0.0447949	0.147986	0.252283	-0.095726	0.00613618	0.014987	0.0335111
	rh_S_front_inf	1699	2712	0.00188899	0.00377799	0.937974	0.978195	-0.0760564	0.0836124	0.000193829	0.00161055	-0.0448631	-0.0898167	0.0193964	0.0646546	-0.153126	-0.0265075	0.100652	0.140445	-0.0467823	0.130823	0.664729	-0.0977133	0.0041488	0.0175913	0.0206956	0.0101041	0.0202092	0.677224	0.913554	-0.0596331	0.100051	0.000664846	0.00216802	-0.0515273	-0.103192	0.00723223	0.047866	-0.166542	-0.0398417	0.17625	0.203366	-0.0616774	0.0463807	0.156736	-0.112608	-0.0107463	0.0520595	0.0702033
	lh_G_front_middle	1699	2712	-0.00356966	-0.00713936	0.883091	0.978195	-0.0869745	0.0726958	0.000251589	0.00161055	-0.0286705	-0.0573645	0.135403	0.225671	-0.120598	0.0058693	0.0168551	0.0404522	-0.0251087	0.417422	0.75895	-0.0760397	0.0258224	0.00250636	0.00537078	0.0213837	0.0427772	0.378266	0.840591	-0.0370934	0.122648	0.00303859	0.00536222	-0.0447375	-0.0895647	0.0197395	0.0845978	-0.152873	-0.0262562	0.0994997	0.127021	-0.0661543	0.0326387	0.142968	-0.117085	-0.0152233	0.0693543	0.0849237
	rh_G_front_middle	1699	2712	0.000663483	0.00132697	0.978195	0.978195	-0.0785072	0.0811611	0.00015981	0.00161055	-0.0485399	-0.0971945	0.0114109	0.0491939	-0.160525	-0.0338635	0.138786	0.171446	-0.0492416	0.111769	0.664729	-0.100173	0.00168946	0.0213401	0.0241587	0.0220595	0.0441298	0.363373	0.840591	-0.0357432	0.124003	0.00330727	0.00551211	-0.0262083	-0.0524347	0.172312	0.258468	-0.11566	0.0107906	0.0121592	0.0311752	-0.0482774	0.11896	0.239945	-0.0992085	0.00265363	0.0197968	0.0363818
	lh_S_front_middle	1699	2712	-0.0174363	-0.0348778	0.472517	0.838055	-0.114736	0.0449805	0.00182624	0.00371214	-0.0612069	-0.122644	0.00141157	0.0211735	-0.186063	-0.0592247	0.335704	0.353372	-0.0438455	0.156769	0.664729	-0.0947766	0.00708555	0.0138646	0.0169771	0.0302119	0.0604514	0.213081	0.690006	-0.0194556	0.140358	0.0086911	0.0121271	-0.06362	-0.127498	0.000904596	0.0180919	-0.190937	-0.0640601	0.382767	0.389255	-0.0939271	0.00241782	0.0549599	-0.144858	-0.0429961	0.279719	0.28446
	rh_S_front_middle	1699	2712	-0.0508838	-0.1019	0.0358292	0.720886	-0.181941	-0.0218585	0.0639081	0.0639081	-0.0516564	-0.103451	0.0070875	0.04725	-0.166802	-0.0401001	0.178002	0.205387	-0.000774593	0.980042	0.980042	-0.0517057	0.0501565	0.000164012	0.00218793	-0.0312249	-0.0624804	0.198119	0.690006	-0.142392	0.0174316	0.00972972	0.012927	-0.0299946	-0.0600162	0.118252	0.215004	-0.123255	0.00322257	0.0199692	0.042791	0.00123151	0.968274	0.968274	-0.0496996	0.0521626	0.000173552	0.00895426
	lh_G_front_inf_Orbital	1699	2712	0.0206261	0.041261	0.395399	0.838055	-0.038607	0.121129	0.00276094	0.00473304	0.00161408	0.00322816	0.933036	0.948851	-0.0599539	0.0664102	0.000204177	0.00612532	-0.019015	0.539148	0.788997	-0.069946	0.0319161	0.0013366	0.00383718	0.0171215	0.0342481	0.480549	0.892018	-0.0456094	0.114106	0.00175176	0.0033905	-0.0121268	-0.0242553	0.52782	0.575803	-0.0874465	0.0389358	0.00140966	0.0128943	-0.0292506	0.344829	0.431036	-0.0801816	0.0216805	0.00376499	0.0173769
	rh_G_front_inf_Orbital	1699	2712	0.0247622	0.0495395	0.307548	0.809322	-0.0303436	0.129423	0.00460823	0.00708958	-0.0314183	-0.0628676	0.101762	0.181962	-0.126112	0.000376707	0.0238491	0.0493429	-0.0561958	0.069542	0.664729	-0.107127	-0.00526476	0.0357543	0.0390047	0.0168244	0.0336536	0.4882	0.892018	-0.0462031	0.11351	0.00168399	0.00336798	0.00964061	0.0192821	0.615744	0.636977	-0.0439056	0.0824699	0.000915364	0.011788	-0.0071851	0.816501	0.83034	-0.0581162	0.043746	0.000355802	0.00895426
	lh_S_precentral_inf_part	1699	2712	-0.00741573	-0.0148319	0.759988	0.968145	-0.0946704	0.0650066	0.000449397	0.00192599	-0.0302788	-0.0605853	0.114804	0.196806	-0.123825	0.00265453	0.0206977	0.0477638	-0.0228722	0.460106	0.781466	-0.0738032	0.0280589	0.00199821	0.00461125	0.0158034	0.0316108	0.514983	0.892018	-0.0482432	0.111465	0.00146893	0.00317926	-0.0186865	-0.0373795	0.330581	0.396697	-0.100583	0.0258244	0.00408906	0.0223039	-0.0344934	0.265284	0.353712	-0.0854245	0.0164377	0.00615505	0.0230814
	rh_S_precentral_inf_part	1699	2712	0.0141917	0.0283863	0.558761	0.857648	-0.0514639	0.108236	0.00118002	0.00311064	-0.0120273	-0.0240563	0.531212	0.601372	-0.0872473	0.0391347	0.00138592	0.00953038	-0.0262205	0.397101	0.75895	-0.0771516	0.0247105	0.00280018	0.00560036	0.0156024	0.0312087	0.520344	0.892018	-0.0486449	0.111062	0.00142968	0.00317926	-0.0288125	-0.0576489	0.133476	0.228816	-0.120883	0.00558542	0.0171679	0.0396182	-0.0444242	0.15137	0.252283	-0.0953552	0.00650689	0.0145397	0.0335111
	lh_S_precentral_sup_part	1699	2712	-0.0408785	-0.0818253	0.0919146	0.720886	-0.161793	-0.00185769	0.0263679	0.028765	-0.0616157	-0.123466	0.00131049	0.0211735	-0.186888	-0.0600436	0.34352	0.355366	-0.0207926	0.501896	0.788997	-0.0717236	0.0301385	0.00161161	0.00402903	0.0272488	0.0545177	0.261471	0.690006	-0.0253757	0.134411	0.0061906	0.009524	-0.0653758	-0.131032	0.000648186	0.0180919	-0.194485	-0.0675792	0.418179	0.418179	-0.0927247	0.002748	0.0549599	-0.143656	-0.0417936	0.266803	0.276003
	rh_S_precentral_sup_part	1699	2712	-0.0112843	-0.0225699	0.642017	0.917167	-0.102414	0.0572743	0.000786742	0.00246449	-0.0480355	-0.096182	0.012297	0.0491939	-0.15951	-0.0328541	0.133039	0.169837	-0.0367877	0.2348	0.681221	-0.0877188	0.0141433	0.00756962	0.0110775	0.0160235	0.0320511	0.509147	0.892018	-0.0478035	0.111906	0.00151305	0.00317926	-0.0326707	-0.0653764	0.0888172	0.18376	-0.128626	-0.00212701	0.0277689	0.0520666	-0.0487072	0.115711	0.239945	-0.0996383	0.00222384	0.0204727	0.0363818
	lh_G_precentral	1699	2712	-0.0416472	-0.0833668	0.0859549	0.720886	-0.163339	-0.00339406	0.0283737	0.0298671	-0.0360954	-0.0722379	0.0600717	0.124286	-0.135502	-0.00897361	0.0412998	0.0756473	0.00556024	0.857489	0.965885	-0.0453708	0.0564913	0.000293507	0.00218793	0.0161388	0.0322818	0.506102	0.892018	-0.047573	0.112137	0.00153664	0.00317926	-0.0297003	-0.0594268	0.121909	0.215133	-0.122664	0.00381079	0.0192378	0.0427507	-0.0458493	0.138678	0.252283	-0.0967803	0.00508179	0.0163241	0.033774
	rh_G_precentral	1699	2712	-0.0262042	-0.0524264	0.280212	0.801176	-0.132315	0.0274625	0.00547504	0.00801226	-0.0312952	-0.062621	0.103112	0.181962	-0.125865	0.000622768	0.0234903	0.0493429	-0.00509519	0.869296	0.965885	-0.0560263	0.0458359	0.000277643	0.00218793	-0.00234477	-0.00468956	0.92305	0.961914	-0.0845241	0.075145	0.000208127	0.00193525	-0.0263948	-0.052808	0.169277	0.258468	-0.116034	0.0104179	0.0124701	0.0311752	-0.0240561	0.437212	0.504475	-0.0749872	0.0268749	0.00225422	0.013354
	lh_G_postcentral	1699	2712	-0.0261933	-0.0524046	0.280412	0.801176	-0.132294	0.0274843	0.00546799	0.00801226	-0.0251218	-0.0502595	0.190807	0.292107	-0.113481	0.0129623	0.0104779	0.028576	0.00107223	0.972376	0.980042	-0.0498588	0.0520033	0.000170169	0.00218793	0.0297015	0.0594293	0.22092	0.690006	-0.0204752	0.139334	0.00820573	0.0117225	-0.0361568	-0.072361	0.0596365	0.143128	-0.135626	-0.00909643	0.0415844	0.0687439	-0.0658829	0.0333593	0.142968	-0.116814	-0.0149518	0.0681932	0.0849237
	rh_G_postcentral	1699	2712	0.00644401	0.0128883	0.790652	0.968145	-0.0669491	0.0927257	0.000388985	0.00185943	-0.024901	-0.0498175	0.194738	0.292107	-0.113039	0.0134036	0.0101622	0.028576	-0.0313502	0.31131	0.681221	-0.0822813	0.0195808	0.00459856	0.00761289	0.023273	0.0465587	0.337566	0.840591	-0.0333187	0.126436	0.00384385	0.00623327	-0.0243501	-0.0487147	0.204802	0.27307	-0.111934	0.0145046	0.00941044	0.0311752	-0.0476322	0.123972	0.239945	-0.0985633	0.00329886	0.0188178	0.0363818
	lh_S_postcentral	1699	2712	0.041327	0.0827247	0.0883981	0.720886	0.00275415	0.162695	0.0275234	0.0294893	-0.038998	-0.0780554	0.0421851	0.110933	-0.141333	-0.0147773	0.0565742	0.0870373	-0.0803684	0.00944394	0.283318	-0.131299	-0.0294373	0.153493	0.156095	-0.00696108	-0.0139225	0.774291	0.960901	-0.0937605	0.0659155	0.000420122	0.00193525	-0.0578289	-0.115852	0.00256569	0.0307883	-0.179245	-0.0524581	0.274046	0.28847	-0.0509323	0.0999916	0.234224	-0.101863	-1.2561e-06	0.0242921	0.0393926
	rh_S_postcentral	1699	2712	0.0404172	0.0809005	0.0956469	0.720886	0.000935838	0.160865	0.0252223	0.0280248	-0.0750568	-0.150538	8.91625e-05	0.00534975	-0.214077	-0.0869992	0.382586	0.382586	-0.115637	0.00018802	0.0112812	-0.166569	-0.0647064	0.453242	0.453242	0.0106868	0.0213749	0.659744	0.913554	-0.0584683	0.101218	0.000722674	0.00216802	-0.0865405	-0.173733	6.12407e-06	0.000367444	-0.23739	-0.110075	0.184735	0.209134	-0.0974447	0.0016493	0.0549599	-0.148376	-0.0465137	0.319152	0.319152
	lh_G_and_S_subcentral	1699	2712	-0.00667928	-0.0133589	0.783196	0.968145	-0.0931965	0.0664788	0.000402877	0.00185943	-0.0486458	-0.097407	0.0112322	0.0491939	-0.160739	-0.0340754	0.140014	0.171446	-0.0420049	0.174916	0.664729	-0.092936	0.00892617	0.0118939	0.0151837	0.0190739	0.0381547	0.431935	0.892018	-0.0417085	0.118018	0.00226241	0.00424201	-0.0539151	-0.107987	0.0049421	0.0423609	-0.171353	-0.0446214	0.210402	0.229529	-0.0730436	0.0183246	0.122164	-0.123975	-0.0221126	0.104174	0.1202
	rh_G_and_S_subcentral	1699	2712	-0.0449878	-0.0900668	0.0635767	0.720886	-0.170063	-0.010071	0.0386196	0.0392742	-0.0561487	-0.112475	0.003416	0.02928	-0.175856	-0.0490934	0.24561	0.2729	-0.0111896	0.717818	0.913326	-0.0621207	0.0397414	0.000565487	0.00226967	-0.0074482	-0.0148968	0.758969	0.960901	-0.0947353	0.0649417	0.000451558	0.00193525	-0.0410644	-0.0821981	0.0323936	0.0965937	-0.145487	-0.0189095	0.0699359	0.0983256	-0.0336391	0.277303	0.361699	-0.0845702	0.0172919	0.00569147	0.0227659
	lh_S_central	1699	2712	-0.0266255	-0.0532699	0.272546	0.801176	-0.133161	0.0266208	0.00575428	0.0082204	-0.0472369	-0.0945795	0.0138245	0.0518417	-0.157903	-0.0312564	0.124281	0.165708	-0.0206403	0.505032	0.788997	-0.0715714	0.0302907	0.00158618	0.00402903	0.0126727	0.0253475	0.601607	0.913554	-0.0544994	0.105194	0.000956379	0.00259876	-0.0263619	-0.0527421	0.16981	0.258468	-0.115968	0.0104837	0.0124147	0.0311752	-0.0390414	0.207356	0.303448	-0.0899725	0.0118897	0.0092303	0.027023
	rh_S_central	1699	2712	-0.0239483	-0.0479103	0.323729	0.809322	-0.12779	0.0319696	0.00417512	0.00677046	-0.0313367	-0.0627043	0.102654	0.181962	-0.125948	0.00053966	0.0236109	0.0493429	-0.00739416	0.811261	0.949814	-0.0583252	0.0435369	0.000364655	0.00218793	-0.00534582	-0.0106918	0.825698	0.961914	-0.0905282	0.0691446	0.000329836	0.00193525	-0.0192984	-0.038604	0.314985	0.385696	-0.101809	0.0246014	0.00449151	0.0224575	-0.0139549	0.652218	0.686545	-0.064886	0.0369762	0.000771604	0.00895426
	lh_G_pariet_inf_Supramar	1699	2712	0.017559	0.0351235	0.469404	0.838055	-0.0447353	0.114982	0.00185607	0.00371214	-0.0136612	-0.027325	0.476937	0.562399	-0.0905187	0.0358687	0.00182595	0.00953038	-0.0312229	0.313279	0.681221	-0.082154	0.0197082	0.00454366	0.00761289	0.0278432	0.055708	0.251201	0.690006	-0.024188	0.135604	0.00663384	0.00970806	-0.0381414	-0.0763383	0.0469229	0.127971	-0.139612	-0.0130644	0.0516628	0.0794812	-0.0660103	0.0330194	0.142968	-0.116941	-0.0150792	0.0687363	0.0849237
	rh_G_pariet_inf_Supramar	1699	2712	0.0276091	0.0552393	0.255212	0.801176	-0.0246557	0.135134	0.00645603	0.00880368	-0.0373322	-0.0747165	0.0518011	0.119541	-0.137986	-0.0114465	0.0473409	0.0811558	-0.0649657	0.0358954	0.53843	-0.115897	-0.0140346	0.0643805	0.067769	-0.00164774	-0.00329549	0.945883	0.961914	-0.0831298	0.0765388	0.000186638	0.00193525	-0.050402	-0.100932	0.0086103	0.047866	-0.164275	-0.0375897	0.161448	0.189939	-0.048797	0.115041	0.239945	-0.0997281	0.00213403	0.0206163	0.0363818
	lh_G_parietal_sup	1699	2712	0.04036	0.0807858	0.0961181	0.720886	0.000821511	0.16075	0.0250832	0.0280248	-0.0169854	-0.0339756	0.37651	0.470637	-0.0971757	0.0292245	0.00313442	0.0144666	-0.0573689	0.0639156	0.664729	-0.1083	-0.00643784	0.0388367	0.0416107	0.031458	0.0629472	0.194788	0.690006	-0.0169659	0.14286	0.00998352	0.012927	-0.024798	-0.0496113	0.196592	0.27307	-0.112832	0.0136095	0.0100177	0.0311752	-0.0562715	0.0691671	0.189707	-0.107203	-0.00534044	0.0359469	0.0539204
	rh_G_parietal_sup	1699	2712	0.0199764	0.0399608	0.410459	0.838055	-0.0399052	0.119827	0.0025413	0.00448465	-0.0139194	-0.0278414	0.468649	0.562399	-0.0910355	0.0353527	0.00190608	0.00953038	-0.0338993	0.273604	0.681221	-0.0848304	0.0170317	0.00582927	0.00911322	0.036041	0.072129	0.137368	0.690006	-0.00780893	0.152067	0.0162861	0.0187916	-0.0243785	-0.0487715	0.204275	0.27307	-0.111991	0.0144479	0.00944792	0.0311752	-0.06044	0.050944	0.156736	-0.111371	-0.00950894	0.0479399	0.0684856
	lh_S_intrapariet_and_P_trans	1699	2712	0.0312207	0.0624719	0.19818	0.801176	-0.0174401	0.142384	0.00972516	0.0121564	-0.00645805	-0.0129164	0.736722	0.772197	-0.0761009	0.0502681	0.00051486	0.00642296	-0.037689	0.223531	0.681221	-0.0886201	0.0132421	0.00819922	0.0117132	0.00612629	0.0122528	0.800751	0.960901	-0.0675843	0.0920899	0.000370931	0.00193525	-0.0310319	-0.0620936	0.106046	0.208146	-0.125336	0.00114913	0.022738	0.044009	-0.0371682	0.229995	0.319791	-0.0880993	0.0137629	0.00783001	0.0247263
	rh_S_intrapariet_and_P_trans	1699	2712	0.0115898	0.0231811	0.633028	0.917167	-0.0566637	0.103026	0.000821495	0.00246449	-0.0339985	-0.0680363	0.0765765	0.148213	-0.131291	-0.00478133	0.0324963	0.0649927	-0.0456019	0.14082	0.664729	-0.096533	0.00532917	0.0160015	0.0192018	0.00642153	0.0128433	0.791365	0.960901	-0.0669941	0.0926807	0.000387681	0.00193525	-0.0363294	-0.0727067	0.0584282	0.143128	-0.135972	-0.00944142	0.0423921	0.0687439	-0.042767	0.167221	0.264033	-0.0936981	0.00816408	0.0126783	0.0330737
	lh_G_oc_temp_lat_fusifor	1699	2712	-0.00124185	-0.00248371	0.9592	0.978195	-0.0823179	0.0773505	0.000175101	0.00161055	-0.0356005	-0.0712462	0.0636739	0.127348	-0.134508	-0.00798422	0.0390649	0.0756095	-0.0343737	0.266946	0.681221	-0.0853048	0.0165573	0.00608815	0.00913223	-0.000622329	-0.00124466	0.979547	0.979547	-0.0810788	0.0785895	0.000158771	0.00193525	-0.0253783	-0.050773	0.186314	0.266163	-0.113996	0.0124496	0.0108554	0.0311752	-0.0247614	0.423892	0.498696	-0.0756925	0.0261696	0.00242049	0.013354
	rh_G_oc_temp_lat_fusifor	1699	2712	-0.0243912	-0.048797	0.314855	0.809322	-0.128679	0.0310846	0.0044061	0.006957	-0.0212997	-0.0426091	0.267402	0.373119	-0.10582	0.0206014	0.00606625	0.0202208	0.00309314	0.920428	0.980042	-0.0478379	0.0540242	0.000218045	0.00218793	0.0530457	0.106241	0.028649	0.409684	0.0261819	0.1863	0.0758959	0.078513	-0.0308998	-0.0618291	0.107542	0.208146	-0.125071	0.00141315	0.0223684	0.044009	-0.0840052	0.0066676	0.0814921	-0.134936	-0.0330741	0.182968	0.192598
	lh_G_temporal_middle	1699	2712	-0.017396	-0.0347972	0.473541	0.838055	-0.114656	0.045061	0.00181656	0.00371214	-0.0368806	-0.0738113	0.0547036	0.121564	-0.137079	-0.0105435	0.0450576	0.0795134	-0.0194996	0.528857	0.788997	-0.0704306	0.0314315	0.00140697	0.00383718	0.0387813	0.077621	0.109868	0.690006	-0.00233326	0.157575	0.0214905	0.0243289	-0.0422105	-0.0844963	0.0278538	0.0965937	-0.147791	-0.0212017	0.0783286	0.105979	-0.0810363	0.00886741	0.0829802	-0.131967	-0.0301053	0.158657	0.17308
	rh_G_temporal_middle	1699	2712	0.0137251	0.0274528	0.571765	0.857648	-0.0523964	0.107302	0.00110668	0.00311064	-0.0203455	-0.0406995	0.289435	0.384728	-0.103908	0.0225085	0.00526291	0.0197359	-0.0340743	0.271135	0.681221	-0.0850054	0.0168568	0.00592359	0.00911322	0.0334837	0.0670049	0.167549	0.690006	-0.0129187	0.146929	0.0124435	0.0155544	-0.0502782	-0.100684	0.00877542	0.047866	-0.164026	-0.0373419	0.15987	0.189939	-0.0838169	0.00679101	0.0814921	-0.134748	-0.0328858	0.18136	0.192598
	lh_G_and_S_cingul_Ant	1699	2712	-0.0315722	-0.063176	0.193171	0.801176	-0.14309	0.0167377	0.01011	0.0123795	-0.0629049	-0.126059	0.00103373	0.0211735	-0.189492	-0.062627	0.368602	0.37485	-0.0314053	0.31046	0.681221	-0.0823364	0.0195257	0.00462249	0.00761289	-0.00192271	-0.00384542	0.936869	0.961914	-0.0836798	0.075989	0.000194855	0.00193525	-0.0525818	-0.105309	0.00612379	0.0459284	-0.168666	-0.0419525	0.190877	0.212086	-0.0507077	0.101497	0.234224	-0.101639	0.000223415	0.0238811	0.0393926
	rh_G_and_S_cingul_Ant	1699	2712	-0.0310831	-0.0621962	0.200167	0.801176	-0.142108	0.017715	0.00957804	0.0121564	-0.0534693	-0.107092	0.00531207	0.0398405	-0.170455	-0.043729	0.203746	0.230656	-0.0224272	0.46888	0.781466	-0.0733583	0.0285038	0.00190904	0.0045817	-0.0129655	-0.0259333	0.593234	0.913554	-0.105781	0.0539143	0.000996192	0.00259876	-0.0411399	-0.0823495	0.0320761	0.0965937	-0.145638	-0.0190606	0.0704667	0.0983256	-0.0281969	0.362487	0.443862	-0.0791279	0.0227342	0.00340003	0.0170002
	lh_G_and_S_cingul_Mid_Ant	1699	2712	-0.0194069	-0.038821	0.423937	0.838055	-0.118685	0.0410431	0.0023619	0.00429437	-0.0590736	-0.118354	0.00206574	0.0247889	-0.181757	-0.0549511	0.296111	0.317262	-0.0397332	0.199419	0.664729	-0.0906642	0.0111979	0.00980031	0.0135665	0.00193772	0.00387545	0.936377	0.961914	-0.075959	0.0837098	0.000195313	0.00193525	-0.0377232	-0.0755	0.0493937	0.128853	-0.138772	-0.0122282	0.0493914	0.0779864	-0.0396788	0.200034	0.300052	-0.0906098	0.0112523	0.0097544	0.027023
	rh_G_and_S_cingul_Mid_Ant	1699	2712	-0.00194711	-0.00389423	0.93607	0.978195	-0.0837286	0.0759402	0.0001956	0.00161055	-0.0275624	-0.0551458	0.151179	0.245155	-0.118376	0.00808411	0.014578	0.0364449	-0.0256223	0.40796	0.75895	-0.0765534	0.0253088	0.00263844	0.00545884	-0.00377393	-0.00754791	0.876453	0.961914	-0.0873831	0.0722873	0.000259614	0.00193525	-0.0598945	-0.120004	0.00178668	0.0268002	-0.183413	-0.0565954	0.311094	0.321822	-0.0561923	0.0695593	0.189707	-0.107123	-0.00526127	0.0357454	0.0539204
	lh_G_and_S_cingul_Mid_Post	1699	2712	0.00399154	0.00798315	0.869391	0.978195	-0.0718522	0.0878185	0.000268425	0.00161055	-0.0361615	-0.0723703	0.0596036	0.124286	-0.135635	-0.00910574	0.041606	0.0756473	-0.0401688	0.194535	0.664729	-0.0910999	0.0107622	0.0101748	0.0135665	-0.0098412	-0.0196834	0.685165	0.913554	-0.0995252	0.0601585	0.000640188	0.00216802	-0.0553612	-0.110892	0.00389678	0.0389678	-0.174268	-0.0475165	0.232847	0.249479	-0.0455763	0.141043	0.252283	-0.0965074	0.00535477	0.0159685	0.033774
	rh_G_and_S_cingul_Mid_Post	1699	2712	0.00123964	0.00247928	0.959273	0.978195	-0.0773549	0.0823135	0.00017504	0.00161055	-0.0392884	-0.0786375	0.0406735	0.110933	-0.141917	-0.015358	0.0583205	0.0874807	-0.0405483	0.190353	0.664729	-0.0914793	0.0103828	0.0105112	0.0137103	0.0142277	0.0284582	0.557766	0.904486	-0.0513921	0.108308	0.00118585	0.00296462	-0.0256262	-0.0512692	0.182047	0.266163	-0.114493	0.0119542	0.0112313	0.0311752	-0.0398604	0.197983	0.300052	-0.0907915	0.0110707	0.00990843	0.027023
	lh_G_cingul_Post_dorsal	1699	2712	0.00352918	0.0070584	0.884408	0.978195	-0.0727767	0.0868935	0.000250027	0.00161055	-0.0453435	-0.0907804	0.0181322	0.0639961	-0.154092	-0.0274684	0.105148	0.143383	-0.0489038	0.114248	0.664729	-0.0998349	0.00202726	0.0207882	0.0239864	0.00810868	0.0162179	0.738345	0.960901	-0.0636214	0.0960572	0.000497675	0.0019907	-0.0468854	-0.093874	0.0145484	0.0671463	-0.157195	-0.0305531	0.120556	0.150695	-0.0550286	0.0755373	0.197054	-0.10596	-0.00409758	0.0328894	0.0519306
	rh_G_cingul_Post_dorsal	1699	2712	0.0270392	0.0540982	0.265159	0.801176	-0.0257942	0.133991	0.00604076	0.00842896	-0.0384233	-0.0769034	0.0453163	0.110933	-0.140179	-0.0136282	0.0532405	0.0863359	-0.0654881	0.0344315	0.53843	-0.116419	-0.014557	0.0665312	0.0688254	0.0276023	0.0552256	0.255329	0.690006	-0.0246694	0.135121	0.00645091	0.00967637	-0.0342263	-0.0684927	0.0746212	0.159903	-0.131749	-0.00523678	0.0333707	0.060674	-0.061849	0.0457758	0.156736	-0.11278	-0.0109179	0.0526524	0.0702033
	lh_G_cingul_Post_ventral	1699	2712	-0.0159169	-0.0318378	0.511969	0.838055	-0.111692	0.0480165	0.00149153	0.00331451	-0.0135625	-0.0271275	0.480129	0.562399	-0.0903209	0.036066	0.00179611	0.00953038	0.00235494	0.939376	0.980042	-0.0485761	0.053286	0.00019926	0.00218793	0.0522206	0.104584	0.0312285	0.409684	0.0245317	0.184636	0.0711328	0.0748766	0.00739717	0.0147947	0.700171	0.712038	-0.0483906	0.0779801	0.000611765	0.011788	-0.0448708	0.1473	0.252283	-0.0958019	0.00606024	0.01508	0.0335111
	rh_G_cingul_Post_ventral	1699	2712	-0.00948141	-0.0189637	0.696092	0.923367	-0.098805	0.0608776	0.000607807	0.0021452	-0.000538435	-0.00107687	0.977638	0.977638	-0.0642588	0.062105	0.000164934	0.00612532	0.00894326	0.772712	0.927255	-0.0419878	0.0598743	0.000436908	0.00226967	0.0360094	0.0720656	0.137714	0.690006	-0.00787209	0.152003	0.016233	0.0187916	0.0262927	0.0526037	0.170933	0.258468	-0.0106219	0.115829	0.0122991	0.0311752	-0.00972621	0.753434	0.779414	-0.0606573	0.0412049	0.000478279	0.00895426
	lh_S_orbital_med_olfact	1699	2712	-0.0157764	-0.0315567	0.515703	0.838055	-0.111411	0.0482973	0.00146359	0.00331451	-0.0272138	-0.0544477	0.156422	0.246982	-0.117676	0.008781	0.0139186	0.0363093	-0.0114428	0.711715	0.913326	-0.0623739	0.0394883	0.000581989	0.00226967	0.0105256	0.0210523	0.664563	0.913554	-0.0587906	0.100895	0.000706224	0.00216802	-0.0495377	-0.0991971	0.00982341	0.049117	-0.162534	-0.0358599	0.150644	0.184462	-0.0601042	0.0522454	0.156736	-0.111035	-0.00917313	0.0468681	0.0684856
	rh_S_orbital_med_olfact	1699	2712	0.00909444	0.0181896	0.707915	0.923367	-0.0616511	0.0980303	0.000574674	0.0021452	-0.0224714	-0.0449541	0.24196	0.345657	-0.108168	0.0182597	0.00720014	0.0225674	-0.0315698	0.307933	0.681221	-0.0825009	0.0193612	0.00469462	0.00761289	0.015001	0.0300055	0.536554	0.894257	-0.0498466	0.109858	0.00131787	0.00316288	-0.0357301	-0.0715059	0.0627138	0.144724	-0.134769	-0.00824332	0.0396404	0.067955	-0.0507475	0.101229	0.234224	-0.101679	0.000183554	0.0239536	0.0393926
	lh_G_orbital	1699	2712	-0.0329605	-0.0659568	0.174294	0.801176	-0.145878	0.0139641	0.0117624	0.0138382	-0.0500178	-0.100161	0.00913194	0.0491939	-0.163501	-0.0368209	0.156585	0.184218	-0.0170872	0.581057	0.810777	-0.0680182	0.0338439	0.00108735	0.0036245	0.0309382	0.0619061	0.202274	0.690006	-0.0180045	0.141817	0.00942527	0.0128526	-0.030479	-0.0609864	0.112421	0.21079	-0.124227	0.00225425	0.0212244	0.0439126	-0.0614365	0.0472408	0.156736	-0.112368	-0.0105055	0.0512365	0.0702033
	rh_G_orbital	1699	2712	-0.0157352	-0.0314742	0.516801	0.838055	-0.111328	0.0483796	0.00145549	0.00331451	-0.0431964	-0.0864734	0.0243981	0.0770466	-0.149773	-0.0231735	0.086141	0.123059	-0.0274868	0.3747	0.749399	-0.0784179	0.0234443	0.00317237	0.00614007	0.00471819	0.00943648	0.845889	0.961914	-0.0703994	0.0892724	0.000299907	0.00193525	-0.00986411	-0.0197292	0.607583	0.636977	-0.0829172	0.0434588	0.000952197	0.011788	-0.0145826	0.637672	0.68322	-0.0655137	0.0363484	0.000827148	0.00895426
	lh_G_rectus	1699	2712	-0.0183239	-0.0366539	0.450265	0.838055	-0.116515	0.043207	0.0020521	0.00397182	-0.0492121	-0.0985437	0.0103183	0.0491939	-0.161879	-0.0352086	0.146704	0.176044	-0.030926	0.317903	0.681221	-0.0818571	0.0200051	0.00441793	0.00761289	-0.00293453	-0.00586908	0.90378	0.961914	-0.0857039	0.0739657	0.000228094	0.00193525	-0.0278022	-0.0556258	0.147652	0.246087	-0.118857	0.00760492	0.0150468	0.0361124	-0.0248748	0.421774	0.498696	-0.0758059	0.0260563	0.00244823	0.013354
	rh_G_rectus	1699	2712	-0.0227023	-0.0454163	0.349554	0.838055	-0.125292	0.0344589	0.00358246	0.00597076	-0.0418561	-0.0837856	0.0291952	0.0875857	-0.147078	-0.0204929	0.0756556	0.110715	-0.0191743	0.535753	0.788997	-0.0701054	0.0317568	0.00135937	0.00383718	-0.0270764	-0.0541727	0.264502	0.690006	-0.134065	0.02572	0.0060671	0.009524	-0.0423609	-0.0847978	0.0273009	0.0965937	-0.148093	-0.0215025	0.0794843	0.105979	-0.0153032	0.621146	0.677614	-0.0662343	0.0356279	0.000895426	0.00895426
	lh_S_circular_insula_ant	1699	2712	0.042531	0.085139	0.0794928	0.720886	0.00516035	0.165118	0.030835	0.0318983	-0.0109962	-0.0219938	0.567002	0.630002	-0.0851833	0.0411957	0.00116059	0.00953038	-0.0535533	0.0837122	0.664729	-0.104484	-0.00262227	0.0295415	0.0328239	0.0351367	0.0703169	0.147522	0.690006	-0.00961585	0.15025	0.0148246	0.0181526	-0.012509	-0.0250199	0.514892	0.572102	-0.0882117	0.0381718	0.00150433	0.0128943	-0.0476608	0.123746	0.239945	-0.0985919	0.00327023	0.0188603	0.0363818
	rh_S_circular_insula_ant	1699	2712	0.00319352	0.00638706	0.895335	0.978195	-0.0734478	0.086222	0.000237416	0.00161055	-0.00621058	-0.0124214	0.746457	0.772197	-0.0756057	0.0507629	0.000491804	0.00642296	-0.00940418	0.761345	0.927255	-0.0603352	0.0415269	0.000460842	0.00226967	0.0537675	0.107691	0.0265452	0.409684	0.0276254	0.187756	0.0802579	0.0816182	0.0170075	0.0340199	0.375889	0.442222	-0.0291803	0.09722	0.00314542	0.0188725	-0.0368103	0.234513	0.319791	-0.0877413	0.0141208	0.00758482	0.0247263
	lh_S_circular_insula_inf	1699	2712	-0.0369239	-0.0738983	0.127982	0.801176	-0.153841	0.00604476	0.0178303	0.0205734	-0.0382634	-0.0765828	0.0462219	0.110933	-0.139857	-0.0133083	0.0523408	0.0863359	-0.00134132	0.965447	0.980042	-0.0522724	0.0495897	0.00017592	0.00218793	0.0217017	0.0434136	0.371212	0.840591	-0.0364581	0.123285	0.00316246	0.00542137	-0.0152778	-0.0305591	0.42637	0.482683	-0.0937558	0.0326375	0.00238291	0.0159733	-0.0369841	0.232311	0.319791	-0.0879152	0.013947	0.00770303	0.0247263
	rh_S_circular_insula_inf	1699	2712	0.00105041	0.00210083	0.965485	0.978195	-0.0777334	0.081935	0.000169894	0.00161055	-0.0389185	-0.077896	0.0426071	0.110933	-0.141174	-0.0146183	0.0561035	0.0870373	-0.0399886	0.196545	0.664729	-0.0909196	0.0109425	0.0100184	0.0135665	0.0102767	0.0205545	0.672026	0.913554	-0.059288	0.100397	0.000681518	0.00216802	-0.0213986	-0.042807	0.265186	0.331482	-0.106018	0.0204038	0.00615544	0.0284097	-0.031679	0.306263	0.390974	-0.0826101	0.0192521	0.00474302	0.0203272
	lh_G_cuneus	1699	2712	-0.00592036	-0.0118409	0.807315	0.968778	-0.0916778	0.067996	0.000359648	0.00185943	0.00666847	0.0133372	0.728477	0.772197	-0.0498475	0.0765219	0.000535247	0.00642296	0.012589	0.684324	0.913326	-0.0383421	0.0635201	0.000662414	0.00233793	0.0676363	0.135583	0.00522786	0.313671	0.0553826	0.215783	0.203574	0.203574	0.00480785	0.00961581	0.802364	0.802364	-0.0535675	0.0727991	0.000378218	0.011788	-0.0629318	0.0421106	0.156736	-0.113863	-0.0120007	0.0565183	0.0737195
	rh_G_cuneus	1699	2712	-0.0106791	-0.0213595	0.659974	0.920894	-0.101203	0.0584837	0.000721881	0.00240627	0.0133385	0.0266793	0.487412	0.562399	-0.0365138	0.0898724	0.00173007	0.00953038	0.0240188	0.437924	0.772807	-0.0269123	0.0749499	0.00224571	0.00499046	0.0444997	0.0890877	0.0665102	0.665102	0.00909536	0.16908	0.0369571	0.0403168	0.0227134	0.0454385	0.236924	0.302456	-0.017776	0.108653	0.00745642	0.0311752	-0.0218119	0.481166	0.534629	-0.0727429	0.0291192	0.00179166	0.013354
	lh_Lat_Fis_post	1699	2712	-0.029984	-0.0599949	0.216557	0.801176	-0.139901	0.019911	0.00847129	0.0110495	-0.0193313	-0.0386699	0.31416	0.401055	-0.101875	0.0245356	0.00451414	0.0193463	0.0106592	0.730661	0.913326	-0.0402719	0.0615903	0.000532307	0.00226967	0.0513565	0.102849	0.0341403	0.409684	0.0228038	0.182894	0.0663948	0.0711372	-0.0153115	-0.0306265	0.425351	0.482683	-0.0938232	0.0325702	0.00239599	0.0159733	-0.0667144	0.0311941	0.142968	-0.117645	-0.0157833	0.0717982	0.0861578
	rh_Lat_Fis_post	1699	2712	-0.0186236	-0.0372536	0.442889	0.838055	-0.117115	0.0426082	0.00213391	0.00400109	-0.0480347	-0.0961804	0.0122985	0.0491939	-0.159508	-0.0328525	0.13303	0.169837	-0.0294459	0.341616	0.706792	-0.080377	0.0214851	0.00383639	0.00719323	0.0315868	0.0632051	0.192965	0.690006	-0.0167087	0.143119	0.0101262	0.012927	-0.0441921	-0.0884706	0.0212908	0.0851632	-0.151776	-0.0251652	0.0946091	0.123403	-0.0758182	0.0143412	0.107559	-0.126749	-0.0248871	0.121299	0.13732
[truncated: 46 more columns]

## Sheet: S-T12
Supplementary Table 12. Difference-in-differences group × sex × scale interaction effects with equivalence test
Brain Measure	ROI	IBS_F_n	IBS_M_n	HC_F_n	HC_M_n	IBS-SSS											PHQ-12											PHQ-9											GAD-7
						IBS_F_r	IBS_M_r	HC_F_r	HC_M_r	DiD Cohen's q	p_DiD	p_DiD_fdr	DiD_ci90_low	DiD_ci90_high	p_equivalence_DiD	p_equivalence_DiD_fdr	IBS_F_r	IBS_M_r	HC_F_r	HC_M_r	DiD Cohen's q	p_DiD	p_DiD_fdr	DiD_ci90_low	DiD_ci90_high	p_equivalence_DiD	p_equivalence_DiD_fdr	IBS_F_r	IBS_M_r	HC_F_r	HC_M_r	DiD Cohen's q	p_DiD	p_DiD_fdr	DiD_ci90_low	DiD_ci90_high	p_equivalence_DiD	p_equivalence_DiD_fdr	IBS_F_r	IBS_M_r	HC_F_r	HC_M_r	DiD Cohen's q	p_DiD	p_DiD_fdr	DiD_ci90_low	DiD_ci90_high	p_equivalence_DiD	p_equivalence_DiD_fdr
Cortical Thickness	lh_S_front_sup	1995	717	1270	429	0.0223605	0.0179408	-0.0619274	-0.0134817	0.0529457	0.455762	0.830012	-0.0638187	0.16971	0.00211543	0.0043038	-0.011668	0.0632964	0.0408648	-0.012156	-0.128094	0.0711608	0.760928	-0.244858	-0.0113294	0.0357877	0.0383904	-0.0274746	0.0426485	0.0417384	0.0486328	-0.0632473	0.37295	0.91673	-0.180012	0.053517	0.00331082	0.0048603	-0.0218164	0.0282978	0.0153363	-0.0509734	-0.11648	0.100828	0.704379	-0.233245	0.000283983	0.0246836	0.0280064
	rh_S_front_sup	1995	717	1270	429	0.0025868	0.0364492	-0.051681	0.0533574	0.0712567	0.31548	0.800737	-0.0455076	0.188021	0.00462775	0.00650089	-0.0300633	0.0310564	0.036423	-0.096384	-0.194262	0.00620854	0.366304	-0.311026	-0.0774976	0.192232	0.192232	-0.0422443	0.0259128	0.0252395	0.0189113	-0.0745193	0.293833	0.91673	-0.191284	0.042245	0.00528642	0.00663614	-0.0470384	0.0533069	0.0355455	0.0217137	-0.114274	0.107448	0.704379	-0.231038	0.00249036	0.0229405	0.026539
	lh_G_front_sup	1995	717	1270	429	0.00754151	0.0243585	-0.0274712	0.0118344	0.0224913	0.75137	0.886617	-0.0942731	0.139256	0.00050196	0.0027867	-0.01028	0.0230267	0.0322674	-0.0087011	-0.074291	0.295315	0.887674	-0.191055	0.0424734	0.00523774	0.00753724	-0.0372451	0.0156193	-0.0104032	0.0155783	-0.0268998	0.704735	0.91673	-0.143664	0.0898646	0.000624771	0.00201139	-0.00645375	0.0102247	-0.00554193	-0.0941831	-0.1056	0.136861	0.807482	-0.222364	0.0111644	0.0170589	0.0201295
	rh_G_front_sup	1995	717	1270	429	-0.0101509	0.0340241	-0.0348084	0.0452877	0.0359526	0.612532	0.847948	-0.0808117	0.152717	0.000968269	0.00300673	0.00641979	0.0402326	0.014869	-0.0923775	-0.141346	0.046466	0.760928	-0.25811	-0.0245818	0.053142	0.0550066	-0.0360547	0.0541833	-0.00673228	-0.019393	-0.10297	0.146911	0.91673	-0.219734	0.0137945	0.0155524	0.0173131	-0.0466805	0.0604988	0.000572785	-0.0137438	-0.121605	0.0867054	0.704379	-0.238369	-0.00484032	0.0291643	0.030896
	lh_S_front_inf	1995	717	1270	429	0.0322576	0.0474412	0.00538872	0.0672475	0.0467524	0.510153	0.830012	-0.0700119	0.163517	0.00160094	0.00354123	-0.0267158	0.0357354	0.0378384	-0.0157345	-0.116065	0.102049	0.760928	-0.232829	0.000699354	0.0243472	0.0266016	-0.0218318	0.0383156	0.0234629	0.0669898	-0.0165466	0.815691	0.943642	-0.133311	0.100218	0.000371543	0.00201139	0.00433188	0.0251507	0.00379165	-0.0401879	-0.0648253	0.361142	0.977665	-0.18159	0.0519391	0.00353989	0.00505107
	rh_S_front_inf	1995	717	1270	429	0.0049867	0.0445058	-0.0237352	0.00875649	-0.00705209	0.920866	0.984096	-0.123816	0.109712	0.000226666	0.00193614	-0.00245148	-0.0160812	-0.0117323	0.0191955	0.0445618	0.530174	0.971697	-0.0722026	0.161326	0.00144822	0.00280484	0.0140795	0.00872993	0.0135602	0.0153529	0.00714338	0.919845	0.958444	-0.109621	0.123908	0.000227763	0.00201139	0.0248122	0.0226237	0.0252124	-0.0372565	-0.0603018	0.395621	0.977665	-0.177066	0.0564626	0.00291859	0.0044153
	lh_G_front_middle	1995	717	1270	429	0.0277838	0.0453423	-0.015607	0.00914968	0.00717575	0.919483	0.984096	-0.109589	0.12394	0.000228154	0.00193614	-0.00902474	0.034612	0.0315087	-0.0243499	-0.0995247	0.160916	0.760928	-0.216289	0.0172397	0.013753	0.0169048	-0.012446	0.0419459	0.0386418	0.0545438	-0.0384802	0.587771	0.91673	-0.155245	0.0782841	0.0010913	0.00241958	0.0168751	0.0293692	0.0197365	-0.0509759	-0.0832601	0.240844	0.900901	-0.200024	0.0335042	0.00747934	0.00980624
	rh_G_front_middle	1995	717	1270	429	0.0098523	0.0211699	0.00163181	0.0772103	0.0644121	0.364211	0.800737	-0.0523523	0.181176	0.00347856	0.0055469	0.0114009	0.0504923	0.0144517	-0.0782141	-0.131961	0.0630377	0.760928	-0.248725	-0.0151965	0.0402898	0.0424482	-0.0149963	0.0779595	0.0260083	0.054156	-0.0649205	0.360437	0.91673	-0.181685	0.0518438	0.00355415	0.0048603	-0.0139612	0.0837121	0.0318166	-0.0281275	-0.157833	0.02619	0.704379	-0.274597	-0.0410685	0.0833514	0.0833514
	lh_S_front_middle	1995	717	1270	429	0.0107543	0.0282812	-0.0390261	0.0454761	0.0670193	0.34512	0.800737	-0.049745	0.183784	0.00388204	0.005726	-0.00951907	0.011779	-0.0231562	0.0670455	0.0690077	0.330997	0.887674	-0.0477567	0.185772	0.00421739	0.00649866	-0.0216841	-5.51993e-06	-0.0274703	0.0453749	0.0512013	0.470744	0.91673	-0.0655631	0.167966	0.00195713	0.00341346	0.00065607	0.0417502	-0.0227732	-0.0155195	-0.033862	0.633353	0.977665	-0.150626	0.0829023	0.000876277	0.00215418
	rh_S_front_middle	1995	717	1270	429	-0.00506541	0.0219531	-0.0472307	0.0414882	0.0617557	0.384328	0.800737	-0.0550086	0.17852	0.00310663	0.00539092	-0.00976616	0.0133927	0.0226775	0.00747844	-0.0383628	0.588911	0.972752	-0.155127	0.0784016	0.00108528	0.00256126	-0.010214	0.0282351	-0.00877306	0.0563841	0.0267603	0.706195	0.91673	-0.0900041	0.143525	0.000620493	0.00201139	-0.0215313	0.0245936	-0.00350128	0.019939	-0.0226902	0.749244	0.977665	-0.139455	0.0940741	0.000506983	0.00176268
	lh_G_front_inf_Orbital	1995	717	1270	429	-0.00122376	0.00802423	0.00322631	0.00876055	-0.00371371	0.958278	0.984096	-0.120478	0.113051	0.00018975	0.00193614	0.0127653	0.0212447	-0.0172058	0.0503043	0.0590723	0.405325	0.971697	-0.057692	0.175837	0.00276765	0.00453586	0.0144854	0.0210856	-0.00946628	0.0696409	0.0726181	0.306324	0.91673	-0.0441463	0.189382	0.00489312	0.00627596	0.021544	-0.0355419	-0.00944229	-0.0249876	0.0415539	0.5583	0.977665	-0.0752104	0.158318	0.00126016	0.00256378
	rh_G_front_inf_Orbital	1995	717	1270	429	0.0166521	0.00195988	-0.0393238	-0.0200749	0.0339602	0.632368	0.847948	-0.0828041	0.150725	0.000880412	0.00291387	0.0452725	0.00902828	-0.0266069	-0.0703506	-0.00757897	0.914976	0.98152	-0.124343	0.109185	0.000233071	0.00179108	0.0593571	0.0500306	-0.0419132	0.00937715	0.0606697	0.392744	0.91673	-0.0560946	0.177434	0.00296517	0.00472825	0.0532542	0.0181789	-0.0111461	-0.0194896	0.0267782	0.706008	0.977665	-0.0899862	0.143543	0.00062104	0.00192849
	lh_S_precentral_inf_part	1995	717	1270	429	0.018808	0.087478	0.00400632	-0.0136749	-0.0865741	0.22263	0.800737	-0.203338	0.0301902	0.00850032	0.0100304	0.0042104	-0.0476709	0.0188069	-0.0219174	0.0111875	0.874774	0.97414	-0.105577	0.127952	0.000281687	0.00179108	-0.021386	-0.0506614	0.0333929	0.0223749	0.0182888	0.79669	0.943642	-0.0984755	0.135053	0.000406067	0.00201139	-0.00475331	-0.0134771	0.0116074	-0.0340706	-0.0369672	0.602538	0.977665	-0.153732	0.0797972	0.00101604	0.00225053
	rh_S_precentral_inf_part	1995	717	1270	429	0.00510722	0.0773347	-0.0135003	0.0660889	0.00730434	0.918046	0.984096	-0.10946	0.124069	0.000229711	0.00193614	0.00701085	0.0265382	0.0369404	-0.0414312	-0.0979456	0.167662	0.760928	-0.21471	0.0188187	0.0129902	0.0163069	0.0144979	-0.0136775	0.0164995	0.0484778	0.0601921	0.396481	0.91673	-0.0565723	0.176956	0.00290482	0.00472825	-0.003268	0.00929012	0.0110697	-0.00635621	-0.0299849	0.672737	0.977665	-0.146749	0.0867795	0.000726616	0.00204145
	lh_S_precentral_sup_part	1995	717	1270	429	0.0322096	0.050252	-0.0104843	-0.0585302	-0.066186	0.351151	0.800737	-0.18295	0.0505784	0.00374874	0.00567117	-0.0145253	0.0217856	0.0477687	-0.000873785	-0.0849942	0.231186	0.858783	-0.201759	0.0317701	0.00799925	0.0104879	-0.0223923	0.00522164	0.0473265	0.043821	-0.0311306	0.660998	0.91673	-0.147895	0.0856338	0.000768187	0.00201139	-0.0297036	0.016942	0.058632	-0.0414614	-0.14684	0.0385899	0.704379	-0.263605	-0.0300761	0.0620579	0.0631279
	rh_S_precentral_sup_part	1995	717	1270	429	0.0117401	0.0724683	-0.0149002	0.0757113	0.0299028	0.673581	0.852883	-0.0868616	0.146667	0.00072372	0.00291387	-0.0303847	-0.0191066	0.0404361	-0.0609487	-0.112768	0.112162	0.760928	-0.229532	0.0039968	0.0218108	0.0245651	-0.0275766	-0.0309494	0.0334033	0.0248878	-0.00514705	0.942199	0.958444	-0.121911	0.111617	0.000204852	0.00201139	-0.0557974	0.0170302	0.0391549	-0.028096	-0.140166	0.0483241	0.704379	-0.25693	-0.0234013	0.0513659	0.0531682
	lh_G_precentral	1995	717	1270	429	0.0238102	0.0863027	-0.00883392	-0.0266933	-0.0805686	0.256389	0.800737	-0.197333	0.0361957	0.00673128	0.0084499	0.00741627	0.0210194	0.0373806	-0.0579162	-0.108985	0.124718	0.760928	-0.22575	0.00777915	0.0191799	0.0221885	-0.0300343	0.000678803	0.0323422	-0.0139904	-0.0770669	0.277639	0.91673	-0.193831	0.0396974	0.00585739	0.00719971	-0.0104754	0.013108	0.0412573	-0.0559847	-0.120909	0.0885246	0.704379	-0.237673	-0.00414418	0.0285185	0.030896
	rh_G_precentral	1995	717	1270	429	0.00766097	0.0481525	-0.0322127	0.0193892	0.0110868	0.875891	0.984096	-0.105678	0.127851	0.000280211	0.00206656	-0.00168503	-0.0112247	0.040868	-0.0693979	-0.10086	0.155371	0.760928	-0.217625	0.0159042	0.0144281	0.0173726	-0.0132683	0.00492914	0.00290629	-0.0251305	-0.0462404	0.514797	0.91673	-0.163005	0.070524	0.00156399	0.00309312	-0.0122758	0.036311	0.00819063	0.00544121	-0.0513529	0.469431	0.977665	-0.168117	0.0654115	0.00197045	0.00358891
	lh_G_postcentral	1995	717	1270	429	0.0167063	0.0183905	-0.0216335	-0.0810324	-0.0612582	0.38817	0.800737	-0.178023	0.0555061	0.00304109	0.00539092	0.0246648	-0.00626372	0.0543588	0.042182	0.0187282	0.791916	0.972752	-0.0980362	0.135493	0.000415233	0.00179108	0.0189179	0.00118994	0.046238	0.0651733	0.036725	0.604917	0.91673	-0.0800394	0.153489	0.00100444	0.00237048	0.014989	0.0234452	0.0679895	-0.0155313	-0.0920865	0.194556	0.900901	-0.208851	0.0246779	0.0104706	0.0126075
	rh_G_postcentral	1995	717	1270	429	0.0456234	-0.0141226	-0.0269325	-0.0077801	0.0789374	0.266144	0.800737	-0.0378269	0.195702	0.00631079	0.00827415	0.0369254	-0.0305457	0.0386557	-0.030955	-0.00214258	0.975922	0.99876	-0.118907	0.114622	0.000174395	0.00179108	0.0514182	-0.0156732	0.0328133	0.0474665	0.0818151	0.249105	0.91673	-0.0349493	0.198579	0.00706908	0.00834151	0.0219093	0.00667869	0.0471419	-0.0299816	-0.0619334	0.382962	0.977665	-0.178698	0.054831	0.00313034	0.00461725
	lh_S_postcentral	1995	717	1270	429	0.020851	0.03086	-0.020432	-0.0730027	-0.0627138	0.376995	0.800737	-0.179478	0.0540505	0.00323644	0.00545572	0.0061897	-0.0168764	0.0389939	-0.0254273	-0.0413787	0.559961	0.971697	-0.158143	0.0753857	0.00124993	0.00269133	-0.0151028	-0.034693	0.0605103	0.0117723	-0.0292085	0.680736	0.91673	-0.145973	0.0875559	0.000699638	0.00201139	-0.0221122	-0.0081098	0.0497709	-0.0543623	-0.118234	0.0958024	0.704379	-0.234998	-0.00146941	0.026147	0.029107
	rh_S_postcentral	1995	717	1270	429	-0.00181007	-0.0306937	-0.0151972	0.0118944	0.0559866	0.430299	0.830012	-0.0607778	0.172751	0.00241936	0.00475807	0.0107054	-0.0296362	0.0424688	-0.00801657	-0.0101604	0.886188	0.97414	-0.126925	0.106604	0.000266966	0.00179108	0.0141188	-0.0350816	0.0446443	0.0741848	0.0788631	0.266594	0.91673	-0.0379013	0.195627	0.00629219	0.00757631	-0.00910375	0.00955768	0.0392157	0.0116403	-0.046257	0.514647	0.977665	-0.163021	0.0705074	0.00156517	0.00297888
	lh_G_and_S_subcentral	1995	717	1270	429	0.0189136	-0.0167175	-0.0427726	0.0329044	0.11135	0.116746	0.800737	-0.00541448	0.228114	0.020791	0.0227161	0.0181463	-0.0351408	0.00381591	-0.00738221	0.0421053	0.55309	0.971697	-0.074659	0.15887	0.00129287	0.00269133	0.0116412	-0.0971434	-0.018596	0.0595689	0.18733	0.00831731	0.438036	0.0705658	0.304094	0.166685	0.166685	0.0180738	-0.0306021	0.0280603	-0.029044	-0.00843239	0.905444	0.977665	-0.125197	0.108332	0.000243805	0.00168974
	rh_G_and_S_subcentral	1995	717	1270	429	0.0192167	-0.0140821	-0.0434475	0.059061	0.135907	0.0555548	0.800737	0.0191424	0.252671	0.0453471	0.0453471	0.0241905	-0.00332544	-0.00397022	-0.00280458	0.0286863	0.686137	0.972752	-0.088078	0.145451	0.000682016	0.001942	0.00309653	-0.0462337	-0.0383745	0.0849675	0.172929	0.0148487	0.438036	0.0561651	0.289694	0.120958	0.123044	0.0152605	-0.00166002	0.00592981	0.00785996	0.018852	0.790573	0.977665	-0.0979124	0.135616	0.000417849	0.00176094
	lh_S_central	1995	717	1270	429	-0.0143329	-0.0267803	-0.0392787	-0.0106632	0.0410881	0.56272	0.830012	-0.0756763	0.157852	0.00123312	0.00348215	0.00649473	-0.0450732	0.00127307	-0.0213616	0.0289607	0.683298	0.972752	-0.0878037	0.145725	0.000691222	0.001942	0.0279788	-0.0436449	0.00765673	0.0564099	0.120472	0.0896818	0.91673	0.00370734	0.237236	0.0281194	0.0291061	0.0241053	-0.0142392	0.0159336	-0.0231188	-0.000707692	0.992046	0.992046	-0.117472	0.116057	0.000161394	0.00168974
	rh_S_central	1995	717	1270	429	0.0163378	-0.065576	-0.0278291	0.00401524	0.113861	0.108724	0.800737	-0.00290324	0.230625	0.0226261	0.0238382	0.00870314	-0.0536	0.0101491	-0.0762495	-0.0241925	0.733255	0.972752	-0.140957	0.0925719	0.000546431	0.00179108	0.00791828	-0.0284181	0.0197697	0.0462439	0.0628487	0.37597	0.91673	-0.0539156	0.179613	0.0032551	0.0048603	-0.0231385	0.00524877	0.00258946	-0.0553872	-0.0864249	0.223428	0.900901	-0.203189	0.0303395	0.00845185	0.0108404
	lh_G_pariet_inf_Supramar	1995	717	1270	429	0.0400877	0.0492797	0.0120102	-0.00811502	-0.0293364	0.679415	0.852883	-0.146101	0.0874279	0.000704019	0.00291387	0.0145567	-0.0450923	0.038872	0.00254082	0.0233299	0.742422	0.972752	-0.0934344	0.140094	0.000523446	0.00179108	-0.00169922	-0.0731789	0.0122578	0.00536056	0.0647129	0.361975	0.91673	-0.0520515	0.181477	0.00352311	0.0048603	-0.00253664	-0.049161	-0.00856775	-0.0178809	0.0373492	0.598794	0.977665	-0.0794152	0.154114	0.00103457	0.00225053
	rh_G_pariet_inf_Supramar	1995	717	1270	429	0.0384929	0.00733198	0.00454918	0.0375209	0.0641691	0.366024	0.800737	-0.0525953	0.180933	0.00344295	0.0055469	0.0215081	-0.0629961	0.0242872	-0.0367872	0.0234953	0.740662	0.972752	-0.0932691	0.14026	0.000527782	0.00179108	-0.00684236	-0.0129521	0.0159539	0.0739994	0.0642899	0.365122	0.91673	-0.0524744	0.181054	0.00346062	0.0048603	-0.00556572	0.0274706	-0.0198097	0.00366981	-0.00956114	0.892859	0.977665	-0.126325	0.107203	0.00025871	0.00168974
	lh_G_parietal_sup	1995	717	1270	429	0.0507836	0.045038	-0.00887137	0.0466647	0.0613291	0.387621	0.800737	-0.0554353	0.178093	0.00305035	0.00539092	0.0152775	0.0302374	0.0467312	0.0444424	-0.0172616	0.807879	0.972752	-0.134026	0.0995028	0.000385368	0.00179108	0.000300223	0.0251231	0.0366773	0.0736253	0.0122369	0.863139	0.958444	-0.104527	0.129001	0.000297505	0.00201139	0.0125752	-0.0129845	0.0204243	-0.058158	-0.0530898	0.454536	0.977665	-0.169854	0.0636745	0.00212902	0.00358891
	rh_G_parietal_sup	1995	717	1270	429	0.0281876	0.026873	-0.00311678	0.0965244	0.101258	0.153747	0.800737	-0.0155061	0.218023	0.0146347	0.0162914	0.0307823	0.0431246	0.03151	0.00230477	-0.041575	0.558101	0.971697	-0.158339	0.0751894	0.00126139	0.00269133	0.0169861	0.0438124	-0.00784403	0.0681616	0.0492589	0.48774	0.91673	-0.0675055	0.166023	0.00179359	0.00339239	0.00650489	0.0547178	-0.0322236	-0.0366177	-0.0526669	0.458138	0.977665	-0.169431	0.0640975	0.00208937	0.00358891
	lh_S_intrapariet_and_P_trans	1995	717	1270	429	0.0238433	0.0268624	-0.00965097	0.0165485	0.0231804	0.744015	0.886617	-0.093584	0.139945	0.000519554	0.0027867	0.0142849	-0.000350224	0.0304289	0.0638594	0.0481443	0.497641	0.971697	-0.06862	0.164909	0.00170546	0.00304916	0.0115068	0.0222651	0.0474599	0.0609578	0.00277645	0.968801	0.968801	-0.113988	0.119541	0.000180444	0.00201139	-0.00519846	-0.000236741	-0.00348014	-0.00198121	-0.00346283	0.961094	0.977665	-0.120227	0.113302	0.000187216	0.00168974
	rh_S_intrapariet_and_P_trans	1995	717	1270	429	0.0352146	0.0380737	-0.00281275	0.124377	0.124974	0.078322	0.800737	0.00820992	0.241739	0.0324641	0.0330238	0.0251628	-0.00121059	0.0475925	0.0482321	0.0270197	0.703481	0.972752	-0.0897446	0.143784	0.00062847	0.001942	0.0123	0.0515776	0.0159962	0.0437256	-0.0115669	0.870564	0.958444	-0.128331	0.105197	0.000287312	0.00201139	-0.00091141	0.0692027	-0.00148572	-0.0111908	-0.0799305	0.260176	0.902962	-0.196695	0.0368339	0.00656391	0.0090063
	lh_G_oc_temp_lat_fusifor	1995	717	1270	429	0.0147473	-0.00400157	-0.0153721	0.00761925	0.0417426	0.556514	0.830012	-0.0750217	0.158507	0.00127127	0.00348215	0.00538551	-0.0355562	0.0345518	0.00328424	0.00967547	0.891586	0.97414	-0.107089	0.12644	0.000260267	0.00179108	-0.0121921	-0.0309909	-0.0226304	0.0572028	0.0987078	0.16438	0.91673	-0.0180566	0.215472	0.0133537	0.0151513	0.00152401	-0.00858046	-0.00250143	-0.00626451	0.00634153	0.928817	0.977665	-0.110423	0.123106	0.000218288	0.00168974
	rh_G_oc_temp_lat_fusifor	1995	717	1270	429	-0.00470267	0.0721336	-0.00134844	-0.0364929	-0.112122	0.11423	0.800737	-0.228887	0.00464186	0.0213417	0.0228938	0.00279537	0.00750316	0.0834325	-0.0579984	-0.146398	0.0391786	0.760928	-0.263163	-0.029634	0.0612999	0.0623568	-0.0372179	-0.00464642	0.0312499	0.0359463	-0.0278869	0.694437	0.91673	-0.144651	0.0888775	0.000655827	0.00201139	-0.0173644	-0.0127331	0.041241	0.0231667	-0.022726	0.748862	0.977665	-0.13949	0.0940384	0.00050789	0.00176268
	lh_G_temporal_middle	1995	717	1270	429	0.0161514	0.0257172	0.0107008	0.0216829	0.00141506	0.984096	0.984096	-0.115349	0.118179	0.000167685	0.00193614	0.0142744	0.00451804	0.0336206	0.0694743	0.0457104	0.519627	0.971697	-0.071054	0.162475	0.00152656	0.00281459	-0.0201327	-0.0228509	0.0338851	0.0541372	0.0230116	0.745814	0.91673	-0.0937527	0.139776	0.000515194	0.00201139	-0.00588084	0.0120835	-0.00309277	-0.0186236	-0.0334979	0.63701	0.977665	-0.150262	0.0832664	0.000861102	0.00215418
	rh_G_temporal_middle	1995	717	1270	429	0.0235726	0.0152251	0.00424049	0.0471789	0.0513242	0.469679	0.830012	-0.0654402	0.168089	0.00196792	0.00414669	-0.000852064	0.0176246	0.0180691	0.00192626	-0.0346233	0.625737	0.972752	-0.151388	0.0821411	0.000908801	0.00233127	-0.0220425	0.0351201	0.0441718	0.0500248	-0.0513146	0.469762	0.91673	-0.168079	0.0654498	0.00196708	0.00341346	-0.0201751	0.069948	0.0143162	0.0219046	-0.0826493	0.244312	0.900901	-0.199414	0.0341151	0.00730342	0.00979322
	lh_G_and_S_cingul_Ant	1995	717	1270	429	0.00334562	0.0345776	-0.0621346	-0.0336046	-0.00264829	0.970241	0.984096	-0.119413	0.114116	0.000179205	0.00193614	0.00852295	-0.0312585	-0.0242155	-0.0214091	0.0425998	0.548439	0.971697	-0.0741646	0.159364	0.00132286	0.00269133	-0.0204732	-0.0338532	-0.0499317	-0.00448185	0.0588814	0.406844	0.91673	-0.0578829	0.175646	0.00274485	0.00462703	0.0138033	-0.00830237	-0.0624854	-0.0263535	0.0583141	0.41138	0.977665	-0.0584503	0.175078	0.00267811	0.00415811
	rh_G_and_S_cingul_Ant	1995	717	1270	429	-0.0130474	0.0526044	-0.00119246	-0.00362244	-0.0681311	0.337176	0.800737	-0.184895	0.0486333	0.00406648	0.00585176	0.0444255	0.0185895	0.0437428	-0.076785	-0.0948441	0.181528	0.765013	-0.211608	0.0219203	0.0115979	0.0148755	0.000823458	0.0212741	-0.0113693	-0.0407186	-0.0498252	0.482751	0.91673	-0.16659	0.0669392	0.00183994	0.00339239	0.00454822	0.00962157	-0.0262062	0.000494639	0.0216332	0.76056	0.977665	-0.0951312	0.138398	0.000480824	0.00176268
	lh_G_and_S_cingul_Mid_Ant	1995	717	1270	429	-0.0323254	0.0101057	0.00425082	-0.0138678	-0.0605623	0.393583	0.800737	-0.177327	0.0562021	0.0029515	0.00539092	-0.0132034	-0.032494	-0.0325893	0.0318494	0.0837624	0.238018	0.858783	-0.033002	0.200527	0.00762677	0.0102268	-0.0272489	-0.0759077	0.040304	-0.0779428	-0.0696286	0.326664	0.91673	-0.186393	0.0471357	0.00432731	0.00567359	-0.0127197	-0.0496227	0.0269289	-0.0968707	-0.0871678	0.219474	0.900901	-0.203932	0.0295966	0.00869561	0.0109158
	rh_G_and_S_cingul_Mid_Ant	1995	717	1270	429	-0.0123185	0.0173705	-0.0140883	0.0590222	0.0434887	0.540125	0.830012	-0.0732756	0.160253	0.00137838	0.00348215	-0.0293203	-0.012826	0.0103515	-0.043578	-0.0704594	0.320926	0.887674	-0.187224	0.046305	0.00447836	0.00660558	-0.022814	0.0157988	-0.0100685	-0.00520724	-0.0337566	0.634411	0.91673	-0.150521	0.0830078	0.000871856	0.00214331	-0.0190756	0.0312392	-0.0221105	0.0390944	0.0109012	0.877953	0.977665	-0.105863	0.127666	0.000277509	0.00168974
	lh_G_and_S_cingul_Mid_Post	1995	717	1270	429	-0.00149154	0.0653383	0.00357478	-0.00935811	-0.0798563	0.260618	0.800737	-0.196621	0.0369081	0.0065447	0.00839429	-0.0400355	-0.00568945	0.0148997	-0.0300493	-0.0793266	0.263793	0.864656	-0.196091	0.0374377	0.00640895	0.00900305	-0.0348229	-0.0310038	0.0146669	-0.0050665	-0.0235578	0.739997	0.91673	-0.140322	0.0932066	0.00052943	0.00201139	-0.00655871	-0.00207174	-0.0083506	0.0287951	0.0326668	0.64539	0.977665	-0.0840976	0.149431	0.000827363	0.00215418
	rh_G_and_S_cingul_Mid_Post	1995	717	1270	429	0.00742939	0.0326321	-0.00377876	0.0196896	-0.0017432	0.980409	0.984096	-0.118508	0.115021	0.000170681	0.00193614	0.00418397	-0.0280171	0.00620915	-0.04509	-0.0191214	0.787651	0.972752	-0.135886	0.097643	0.000423597	0.00179108	-0.0237128	-0.0126624	-0.0121779	-0.0177159	-0.0165934	0.815179	0.943642	-0.133358	0.100171	0.000372433	0.00201139	-0.00058133	0.0175775	-0.0306235	-0.0210522	-0.00858286	0.903765	0.977665	-0.125347	0.108182	0.000245744	0.00168974
	lh_G_cingul_Post_dorsal	1995	717	1270	429	0.0406975	0.0108054	-0.00256118	-0.016041	0.016433	0.816934	0.94508	-0.100331	0.133197	0.000369389	0.00242155	0.0332796	0.0142964	0.0353872	-0.0336456	-0.0500657	0.48064	0.971697	-0.16683	0.0666986	0.00185995	0.00322757	0.018556	-0.00630635	0.0283993	0.0111885	0.00764658	0.91422	0.958444	-0.109118	0.124411	0.000233905	0.00201139	0.0347857	-0.0165279	0.0257456	-0.0549511	-0.0294287	0.678464	0.977665	-0.146193	0.0873357	0.000707193	0.00204145
	rh_G_cingul_Post_dorsal	1995	717	1270	429	0.0112068	-0.0208273	-0.0256269	0.016955	0.0746267	0.293138	0.800737	-0.0421376	0.191391	0.00530945	0.00711949	0.025229	-0.0244117	-0.021979	0.0104687	0.0821026	0.247446	0.858783	-0.0346618	0.198867	0.00714908	0.0098092	-0.0132644	-0.0282704	-0.0230942	0.000677683	0.0387888	0.58478	0.91673	-0.0779756	0.155553	0.00110726	0.00241958	0.0225238	0.0114837	-0.024592	-0.0735307	-0.0380233	0.592213	0.977665	-0.154788	0.0787411	0.00106805	0.00225053
	lh_G_cingul_Post_ventral	1995	717	1270	429	0.0364294	-0.00203918	0.0104258	-0.0726192	-0.0446887	0.529003	0.830012	-0.161453	0.0720756	0.0014567	0.00348215	0.01989	0.0769949	0.0189871	0.0204796	-0.0557619	0.432152	0.971697	-0.172526	0.0610025	0.00239562	0.00403833	0.015139	0.0383876	-0.0145443	-0.0376243	-0.0463631	0.513683	0.91673	-0.163127	0.0704013	0.00157277	0.00309312	0.0328466	0.0057268	-0.00506921	-0.0206426	0.0115554	0.870692	0.977665	-0.105209	0.12832	0.00028714	0.00168974
	rh_G_cingul_Post_ventral	1995	717	1270	429	0.0287886	-0.0189527	-0.00346027	-0.00734715	0.0438646	0.536629	0.830012	-0.0728998	0.160629	0.00140248	0.00348215	0.0540795	-0.0212072	0.00413041	-0.010493	0.0607189	0.392361	0.971697	-0.0560455	0.177483	0.00297145	0.00473826	0.0294695	0.027036	-0.0262956	0.000783125	0.0295202	0.67752	0.91673	-0.0872442	0.146285	0.000710356	0.00201139	0.0325163	0.0229373	-0.0646124	-0.0214511	0.0528345	0.456709	0.977665	-0.0639299	0.169599	0.002105	0.00358891
	lh_S_orbital_med_olfact	1995	717	1270	429	-0.0218305	0.0560166	-0.027545	0.0163653	-0.0339904	0.632066	0.847948	-0.150755	0.082774	0.000881685	0.00291387	-0.0396986	-0.0104526	-0.0182764	0.0481446	0.0371938	0.600316	0.972752	-0.0795706	0.153958	0.001027	0.0025247	-0.00273719	-0.0622966	-0.0196722	0.0391482	0.118483	0.0951041	0.91673	0.00171885	0.235248	0.0263609	0.0282781	-0.00359621	-0.0578979	-0.0098547	-0.0677387	-0.00362107	0.959318	0.977665	-0.120385	0.113143	0.00018881	0.00168974
	rh_S_orbital_med_olfact	1995	717	1270	429	-0.0213853	0.00424272	-0.0369646	0.0801913	0.091714	0.196367	0.800737	-0.0250504	0.208478	0.0103259	0.0119457	-0.00478095	0.00394838	-0.00250553	-0.00535174	-0.0115756	0.870467	0.97414	-0.12834	0.105189	0.000287444	0.00179108	-0.00175717	-0.0382673	-0.045544	-0.0182212	0.0638812	0.368178	0.91673	-0.0528832	0.180646	0.00340118	0.0048603	0.0170619	-0.0258894	-0.0382725	-0.0563093	0.0248809	0.725966	0.977665	-0.0918834	0.141645	0.000565441	0.00185339
	lh_G_orbital	1995	717	1270	429	0.0132915	0.0071879	-0.0367197	-0.00867797	0.0341623	0.630344	0.847948	-0.082602	0.150927	0.000888976	0.00291387	-0.00202031	0.0220038	-0.016223	-0.00644707	-0.0142503	0.840899	0.97414	-0.131015	0.102514	0.000330197	0.00179108	-0.0240077	0.0437967	-0.0576075	0.0411688	0.0310263	0.662064	0.91673	-0.0857381	0.147791	0.000764314	0.00201139	0.018505	0.0214396	-0.0330385	-0.0729233	-0.0429383	0.545266	0.977665	-0.159703	0.0738261	0.00134375	0.00264271
	rh_G_orbital	1995	717	1270	429	0.00737123	0.00693296	-0.0738503	0.045165	0.119619	0.0919755	0.800737	0.00285472	0.236383	0.0273538	0.0283136	0.0133785	-0.0130623	-0.0420846	-0.0639308	0.00453367	0.949077	0.99876	-0.112231	0.121298	0.000198257	0.00179108	-0.00284095	0.0542107	-0.060753	0.025933	0.0296619	0.67606	0.91673	-0.0871025	0.146426	0.000715278	0.00201139	0.00459952	0.0507703	-0.0630434	-0.0318251	-0.0149232	0.833495	0.977665	-0.131688	0.101841	0.000341845	0.00168974
	lh_G_rectus	1995	717	1270	429	-0.0229687	0.0771387	-0.0426915	-0.00785483	-0.0654026	0.356882	0.800737	-0.182167	0.0513618	0.00362719	0.00563168	-0.0333111	-0.00295674	-0.0167607	-0.00595907	-0.0195636	0.782862	0.972752	-0.136328	0.0972008	0.00043319	0.00179108	-0.0598987	-0.0657764	-0.0157202	0.00993139	0.0315542	0.656679	0.91673	-0.0852102	0.148319	0.000784102	0.00201139	-0.00678646	-0.0122045	-0.0109572	-0.0325512	-0.0161865	0.819632	0.977665	-0.132951	0.100578	0.000364756	0.00168974
	rh_G_rectus	1995	717	1270	429	-0.0240713	0.0265844	-0.0302582	0.0516683	0.0313151	0.659115	0.852883	-0.0854492	0.148079	0.000775084	0.00291387	0.00204359	-0.0274981	-0.0144666	-0.00951599	0.0344999	0.626968	0.972752	-0.0822644	0.151264	0.000903456	0.00233127	-0.00207104	0.0225296	-0.00560671	0.0132081	-0.00578889	0.935006	0.958444	-0.122553	0.110975	0.000211972	0.00201139	-0.00362896	0.0160193	-0.000326018	0.0142652	-0.0050574	0.943204	0.977665	-0.121822	0.111707	0.000203875	0.00168974
	lh_S_circular_insula_ant	1995	717	1270	429	0.0183082	-0.0274618	-0.0168556	0.00959588	0.0722323	0.3089	0.800737	-0.0445321	0.188997	0.00481658	0.00660879	0.000948516	-0.00221231	0.00436891	-0.111442	-0.113115	0.111061	0.760928	-0.229879	0.00364951	0.022067	0.0245651	-0.00300051	-0.00283228	-0.00427375	0.00475707	0.00886265	0.900644	0.958444	-0.107902	0.125627	0.000249389	0.00201139	0.0152511	-0.018301	0.0193932	-0.0791893	-0.0651957	0.358405	0.977665	-0.18196	0.0515687	0.00359568	0.00505107
	rh_S_circular_insula_ant	1995	717	1270	429	0.00712057	0.0478756	-0.0468294	0.0192952	0.0253698	0.720805	0.88599	-0.0913946	0.142134	0.00057931	0.00284827	0.0450082	0.0167943	-0.0026527	-0.0548208	-0.0239803	0.735506	0.972752	-0.140745	0.092784	0.000540693	0.00179108	0.020917	0.0467673	-0.0331671	0.0170696	0.0243691	0.731383	0.91673	-0.0923952	0.141133	0.000551251	0.00201139	0.0186166	0.0161808	0.0261617	-0.033519	-0.0572626	0.419865	0.977665	-0.174027	0.0595018	0.00255827	0.0040794
	lh_S_circular_insula_inf	1995	717	1270	429	0.0150251	-0.00989572	-0.00821609	0.0118288	0.0449679	0.526433	0.830012	-0.0717965	0.161732	0.00147549	0.00348215	-0.00902283	-0.0677323	-0.015612	0.0301356	0.104571	0.140727	0.760928	-0.0121933	0.221335	0.0164553	0.0194173	-0.0156791	-0.0953952	0.021254	0.0538324	0.112633	0.112591	0.91673	-0.00413129	0.229397	0.0217123	0.0237227	0.0134646	-0.0284835	0.000397644	-0.00450903	0.0370499	0.601726	0.977665	-0.0797144	0.153814	0.00102003	0.00225053
	rh_S_circular_insula_inf	1995	717	1270	429	0.00680048	-0.00155769	0.00504698	0.0812913	0.0847824	0.232351	0.800737	-0.031982	0.201547	0.00793408	0.0097523	-0.0243244	-0.0275623	-0.029307	-0.0324338	0.000110282	0.99876	0.99876	-0.116654	0.116875	0.000156254	0.00179108	-0.0159911	-0.0506418	-0.00255028	0.0610651	0.0983842	0.165767	0.91673	-0.0183802	0.215149	0.0131983	0.0151513	-0.00440872	0.0143905	-0.0287098	0.0782525	0.0883302	0.213388	0.900901	-0.0284342	0.205095	0.00908939	0.0111724
	lh_G_cuneus	1995	717	1270	429	0.0464149	0.0413487	-0.0269909	0.0671704	0.0993451	0.161672	0.800737	-0.0174193	0.216109	0.0136644	0.0155038	0.0219718	0.017316	0.0634122	0.127592	0.0694517	0.327895	0.887674	-0.0473127	0.186216	0.00429573	0.00649866	0.0197414	-0.0299994	-0.00458635	0.0648331	0.119263	0.0929473	0.91673	0.00249863	0.236027	0.0270392	0.0284878	0.0526102	-0.024909	0.0133846	0.0575248	0.121776	0.0862624	0.704379	0.00501162	0.23854	0.0293251	0.030896
	lh_Lat_Fis_post	1995	717	1270	429	0.0232524	0.0542035	-0.0429819	0.0349973	0.0470199	0.830012	0.830012	-0.0697445	0.163784	0.00162056	0.00354123	-0.000659079	-0.0766725	0.029534	-0.00167976	0.0449419	0.526672	0.971697	-0.0718224	0.161706	0.00147373	0.00280484	-0.0205483	-0.0526672	0.00508176	0.0382842	0.0653859	0.357005	0.91673	-0.0513785	0.18215	0.00362463	0.0048603	-0.00496248	-0.0240772	-0.000916717	-0.00344882	0.0165872	0.815247	0.977665	-0.100177	0.133352	0.000372315	0.00168974
	rh_Lat_Fis_post	1995	717	1270	429	0.00111145	0.0184605	-0.0798532	0.0233011	0.0859777	0.800737	0.800737	-0.0307866	0.202742	0.00830803	0.0100035	-0.00679189	-0.0343424	0.00626638	-0.0204158	0.0008789	0.990122	0.99876	-0.115885	0.117643	0.000162896	0.00179108	-0.0209717	-0.0406154	0.0248223	0.0507367	0.0456158	0.520492	0.91673	-0.0711486	0.16238	0.00151996	0.00309312	-0.000508478	-0.0118578	-0.00811596	0.0342888	0.0537683	0.448791	0.977665	-0.0629961	0.170533	0.00219403	0.00359577
Surface Area	lh_S_front_sup	1995	717	1270	429	-0.0629278	-0.0699531	0.0109574	-0.00333585	-0.00723713	0.918797	0.960211	-0.124001	0.109527	0.000228896	0.0016842	-0.0524932	-0.027949	0.0492385	-0.00419443	-0.078058	0.271507	0.485985	-0.194822	0.0387063	0.00609391	0.0130584	-0.039767	-0.0307843	0.0533147	0.0327906	-0.0295569	0.677142	0.938029	-0.146321	0.0872074	0.000711629	0.0021972	0.0332375	0.02442	0.0317456	0.0769547	0.0541758	0.445361	0.999427	-0.0625886	0.17094	0.00223394	0.00311698
	rh_S_front_sup	1995	717	1270	429	-0.0324323	-0.0211686	-0.0123694	-0.0545932	-0.0535494	0.450641	0.924858	-0.170314	0.063215	0.00217286	0.00395065	-0.0372686	-0.00350686	0.051005	-0.0376197	-0.122466	0.084497	0.294091	-0.23923	-0.0057014	0.0299798	0.0408816	-0.0373136	0.0114872	0.0320228	-0.0356644	-0.116532	0.100677	0.708397	-0.233296	0.000232485	0.0247256	0.0279913	0.00580974	0.0327501	0.0267171	-0.00604515	-0.0597207	0.400189	0.999427	-0.176485	0.0570436	0.00284635	0.00379513
	lh_G_front_sup	1995	717	1270	429	-0.0399054	-0.0397528	0.00631577	-0.0392832	-0.0457722	0.519063	0.924858	-0.162537	0.0709922	0.00153088	0.00328046	-0.0609814	0.00791809	0.048588	0.0164385	-0.101162	0.154139	0.363555	-0.217926	0.0156025	0.0145844	0.0236504	-0.0367582	-0.0459105	0.0761137	0.0494749	-0.0175779	0.80443	0.938029	-0.134342	0.0991865	0.000391634	0.00213545	-0.0122525	-0.0317685	0.0483432	0.0265561	-0.00229241	0.974238	0.999427	-0.119057	0.114472	0.000175807	0.0011686
	rh_G_front_sup	1995	717	1270	429	-0.034015	-0.0256979	-0.000844754	-0.00841872	-0.0158987	0.822785	0.960211	-0.132663	0.100866	0.000359415	0.00179707	-0.034893	-0.0224189	0.0221329	0.0380439	0.00344122	0.961337	0.961337	-0.113323	0.120206	0.000186999	0.00383201	0.0102481	-0.0369875	0.0431085	0.0502306	0.0543905	0.443559	0.891778	-0.0623738	0.171155	0.00225523	0.00408293	0.0149551	-0.0188539	0.0385976	0.0508376	0.0460772	0.516282	0.999427	-0.0706872	0.162842	0.00155237	0.00238826
	lh_S_front_inf	1995	717	1270	429	-0.0122984	-0.0192965	0.0100819	-0.0662567	-0.0694363	0.328002	0.908281	-0.186201	0.047328	0.004293	0.0064395	-0.0527479	-0.00591872	0.0254234	-0.0808598	-0.153344	0.0307615	0.184569	-0.270108	-0.0365793	0.0740725	0.0871441	-0.038469	-0.0276934	0.0372544	0.00903505	-0.0390239	0.582506	0.891778	-0.155788	0.0777405	0.00111957	0.00295388	-0.0339927	-0.0133841	0.0436256	-0.00421633	-0.0684906	0.334633	0.999427	-0.185255	0.0482737	0.00412778	0.00505442
	rh_S_front_inf	1995	717	1270	429	-0.0595288	-0.022102	0.0354516	-0.0748801	-0.147981	0.037106	0.7385	-0.264745	-0.0312163	0.0640468	0.0662553	-0.0645624	0.00305913	0.0489202	-0.0809147	-0.197763	0.00533835	0.16477	-0.314527	-0.0809984	0.205998	0.205998	-0.0545873	0.00512433	0.0282594	-0.0402531	-0.128308	0.0706897	0.708397	-0.245072	-0.0115435	0.0360257	0.037268	-0.0232122	0.00228656	0.00207597	0.0588186	0.0313077	0.659191	0.999427	-0.0854566	0.148072	0.000774805	0.001659
	lh_G_front_middle	1995	717	1270	429	-0.0677584	-0.0228111	0.00467278	0.0234742	-0.0262416	0.711633	0.960211	-0.143006	0.0905227	0.000604825	0.00213468	-0.0710286	0.0161975	0.0377996	-0.0371124	-0.162294	0.0222407	0.16477	-0.279059	-0.04553	0.0934131	0.103792	-0.0610086	-0.0168147	0.00732978	-0.0300738	-0.0816809	0.249882	0.744275	-0.198445	0.0350834	0.00703202	0.00958911	-0.0248359	0.0116118	0.0140648	-0.0131412	-0.063661	0.369831	0.999427	-0.180425	0.0531033	0.00336955	0.00428044
	rh_G_front_middle	1995	717	1270	429	-0.066478	-0.0581855	0.00231404	-0.0369288	-0.0475846	0.502653	0.924858	-0.164349	0.0691798	0.00166271	0.00332541	-0.0480701	-0.0188922	0.0289165	-0.0192887	-0.0774284	0.275391	0.485985	-0.194193	0.0393359	0.0059427	0.0130584	-0.0335212	-0.0297676	0.0201466	-0.0380199	-0.061945	0.382873	0.891778	-0.178709	0.0548194	0.00313189	0.00521982	0.00110731	-0.0380487	0.0336404	0.0253446	0.0308713	0.663648	0.999427	-0.085893	0.147636	0.000758592	0.001659
	lh_S_front_middle	1995	717	1270	429	-0.0578196	0.00438253	-0.0144105	0.00429938	-0.0435558	0.539501	0.924858	-0.16032	0.0732086	0.00138265	0.00318576	-0.0523525	-0.0448596	0.0368158	0.00919571	-0.0351471	0.620519	0.761413	-0.151911	0.0816173	0.000931821	0.00430071	-0.0191298	-0.0306899	0.0103812	0.0464021	0.0476213	0.502323	0.891778	-0.069143	0.164386	0.00166548	0.00344583	0.0109964	0.00252748	0.0386933	0.0416406	0.0114214	0.872178	0.999427	-0.105343	0.128186	0.000285143	0.0011686
	rh_S_front_middle	1995	717	1270	429	-0.0387541	-0.079312	-0.0424908	-0.0895672	-0.00658602	0.926081	0.960211	-0.12335	0.110178	0.000221137	0.0016842	-0.0463545	0.00430938	-0.0133131	-0.0668697	-0.104353	0.141558	0.363555	-0.221117	0.0124115	0.0163297	0.0257838	-0.0336766	-0.0347985	-0.0401137	-0.0281932	0.0130577	0.854058	0.952787	-0.103707	0.129822	0.00031045	0.00213545	-0.00133782	-0.0330442	-0.0407136	0.035464	0.107933	0.128397	0.999427	-0.00883093	0.224698	0.0184981	0.0191359
	lh_G_front_inf_Orbital	1995	717	1270	429	0.017083	-0.0665099	0.0366637	-0.0231106	0.0238981	0.73638	0.960211	-0.0928663	0.140662	0.000538483	0.00213468	-0.0335901	0.0180934	0.0433836	-0.0827627	-0.178061	0.0121299	0.16477	-0.294826	-0.061297	0.13612	0.138427	-0.0250863	-0.00719922	0.0332366	-0.0356265	-0.0867827	0.221517	0.744275	-0.203547	0.0299817	0.00856848	0.0114246	-0.0514574	0.0383533	-0.0124638	0.0602344	-0.0171031	0.809609	0.999427	-0.133867	0.0996612	0.000382263	0.00120715
	rh_G_front_inf_Orbital	1995	717	1270	429	-0.0337356	-0.0525294	0.0449073	0.0310661	0.00496791	0.944207	0.960211	-0.111796	0.121732	0.000202905	0.0016842	0.00882541	-0.0536552	0.0544158	0.0256782	0.0337467	0.634511	0.761413	-0.0830177	0.150511	0.000871441	0.00430071	-0.0270754	-0.0248587	0.0172815	-0.0355673	-0.0550838	0.437771	0.891778	-0.171848	0.0616806	0.00232524	0.00408293	-0.0250054	0.0210401	0.0245387	0.0252913	-0.0453008	0.523376	0.999427	-0.162065	0.0714636	0.00149819	0.00238558
	lh_S_precentral_inf_part	1995	717	1270	429	-0.041348	-0.0341275	-0.0256131	0.0590341	0.0774907	0.275006	0.908281	-0.0392737	0.194255	0.0059575	0.00812387	-0.0326299	0.00185098	0.0512353	-0.0852149	-0.171195	0.0158822	0.16477	-0.287959	-0.0544304	0.116112	0.124029	-0.00646732	-0.0137193	0.0411239	-0.0650984	-0.0990849	0.162774	0.744275	-0.215849	0.0176795	0.0135368	0.016921	-0.00153796	0.0286947	0.038903	-0.0348106	-0.103988	0.142956	0.999427	-0.220752	0.0127765	0.0161214	0.0169699
	rh_S_precentral_inf_part	1995	717	1270	429	-0.0131531	-0.0146403	0.0159176	-0.0130529	-0.0274852	0.698621	0.960211	-0.14425	0.0892792	0.000643021	0.0021434	-0.0398263	-0.0056771	0.0376272	-0.0712168	-0.143153	0.0437388	0.218694	-0.259917	-0.0263884	0.0559542	0.0685153	-0.0186588	0.0165182	0.0364798	-0.0463035	-0.118013	0.0964232	0.708397	-0.234778	-0.00124889	0.025959	0.0285777	0.0209188	-0.0212024	0.0371986	-0.0327975	-0.0278976	0.694325	0.999427	-0.144662	0.0888667	0.000656172	0.00163803
	lh_S_precentral_sup_part	1995	717	1270	429	-0.0866796	-0.0492635	-0.017716	-0.0796479	-0.0996934	0.160207	0.873857	-0.216458	0.017071	0.0138368	0.0166041	-0.0710812	-0.050729	0.0409048	-0.0497765	-0.111174	0.117325	0.335214	-0.227938	0.00559042	0.0206673	0.031001	-0.0578289	0.0340904	0.00987581	-0.0178235	-0.119699	0.0917594	0.708397	-0.236463	-0.00293429	0.0274245	0.0293834	0.00214869	0.000899642	0.0126724	0.00341408	-0.00800991	0.910161	0.999427	-0.124774	0.108754	0.000238435	0.0011686
	rh_S_precentral_sup_part	1995	717	1270	429	-0.0841177	-0.00187668	-0.0256664	0.0245002	-0.0322632	0.649477	0.960211	-0.149028	0.0845012	0.000811421	0.00231835	-0.0374822	-0.0139132	0.0236517	-0.0132838	-0.0605263	0.393864	0.55729	-0.177291	0.0562381	0.00294693	0.00902088	-0.0125035	0.0448113	0.022874	0.0605864	-0.0195627	0.782871	0.938029	-0.136327	0.0972016	0.000433171	0.00213545	0.0203291	0.0403078	-0.00605447	0.0506939	0.0367942	0.604236	0.999427	-0.0799701	0.153559	0.00100774	0.00183226
	lh_G_precentral	1995	717	1270	429	-0.104065	-0.0562857	-0.0296986	0.000570688	-0.0178201	0.80179	0.960211	-0.134585	0.0989442	0.000396499	0.00181569	-0.0549222	-0.0533158	0.0309515	-0.0294387	-0.0620197	0.382299	0.55729	-0.178784	0.0547447	0.00314191	0.00902088	-0.0319072	0.0110953	0.0274678	-0.00355523	-0.0740438	0.296925	0.760482	-0.190808	0.0427206	0.0051855	0.00818763	0.000909919	0.0205022	0.0275017	0.0441764	-0.00289862	0.967429	0.999427	-0.119663	0.113866	0.000181633	0.0011686
	rh_G_precentral	1995	717	1270	429	-0.0722398	-0.0544293	-0.00739949	-0.0361351	-0.0466339	0.511226	0.924858	-0.163398	0.0701305	0.00159232	0.00329446	-0.0316064	-0.02989	0.00214619	-0.0558994	-0.0598219	0.399391	0.55729	-0.176586	0.0569424	0.00285881	0.00902088	-0.034473	-0.0100278	0.0366551	0.0233391	-0.0377867	0.594519	0.891778	-0.154551	0.0789777	0.00105619	0.00295388	-0.00574631	0.0187378	0.0371709	0.0473353	-0.0143036	0.840313	0.999427	-0.131068	0.102461	0.000331105	0.0011686
	lh_G_postcentral	1995	717	1270	429	-0.0635045	-0.0566841	0.0132235	-0.00973224	-0.029802	0.674618	0.960211	-0.146566	0.0869624	0.000720177	0.00225368	-0.0632389	-0.0654596	0.0145818	-0.0557394	-0.0681501	0.337042	0.546554	-0.184914	0.0486143	0.0040697	0.0101742	-0.052258	-0.0140741	0.0678195	0.0262716	-0.0798767	0.260496	0.744275	-0.196641	0.0368876	0.00654999	0.00950929	-0.021938	-0.00530189	0.0496507	0.107588	0.0416749	0.557155	0.999427	-0.0750895	0.158439	0.00126727	0.00211212
	rh_G_postcentral	1995	717	1270	429	-0.0675479	-0.0988413	0.0502929	-0.0118483	-0.0306702	0.665706	0.960211	-0.147435	0.0860942	0.000751225	0.00225368	-0.0495783	-0.0845023	0.0209609	0.024933	0.0390595	0.582162	0.743219	-0.0777049	0.155824	0.00112144	0.00448578	-0.024993	-0.0619455	0.00367447	0.0132088	0.0465617	0.51188	0.891778	-0.0702026	0.163326	0.00158709	0.00344583	-0.00713569	-0.00521157	-0.00419642	0.0475996	0.0499079	0.482025	0.999427	-0.0668565	0.166672	0.0018468	0.00270263
	lh_S_postcentral	1995	717	1270	429	-0.0611909	-0.0188266	0.0509808	0.0440643	-0.0493709	0.486751	0.924858	-0.166135	0.0673935	0.00180267	0.00348904	-0.0604659	-0.0512059	-0.00605669	0.00966876	0.0064368	0.927751	0.959742	-0.110328	0.123201	0.000219394	0.00383201	-0.0325126	-0.058228	-0.00982775	0.0130243	0.0486229	0.493376	0.891778	-0.0681414	0.165387	0.00174281	0.00348563	-0.0121574	-0.042107	-0.0123462	0.0772006	0.119675	0.091823	0.999427	0.00291088	0.23644	0.0274037	0.0278682
	rh_S_postcentral	1995	717	1270	429	-0.0897242	-0.0560284	0.0638535	-0.0269505	-0.124777	0.0787951	0.772341	-0.241541	-0.00801216	0.0322622	0.0345667	-0.0906352	-0.0921068	0.0128886	-0.0235358	-0.0349455	0.622525	0.761413	-0.15171	0.0818189	0.000922899	0.00430071	-0.041545	-0.0824637	0.0089626	-0.0569659	-0.0249081	0.725679	0.938029	-0.141672	0.0918563	0.000566203	0.00213545	-0.0146509	-0.0305351	0.00011294	0.0388961	0.0546954	0.441008	0.999427	-0.062069	0.17146	0.00228578	0.00311698
	lh_G_and_S_subcentral	1995	717	1270	429	-0.0810629	-0.0325113	-0.00571801	0.0350504	-0.00793563	0.910991	0.960211	-0.1247	0.108829	0.000237502	0.0016842	-0.091885	-0.00758119	0.0465592	-0.0132857	-0.144443	0.041875	0.218694	-0.261207	-0.0276786	0.0580334	0.0696401	-0.0662642	-0.0183007	0.0252409	-0.0198277	-0.0931353	0.189523	0.744275	-0.2099	0.023629	0.0108876	0.0138991	-0.027645	-0.00635563	0.0200285	0.00638126	-0.0349461	0.622519	0.999427	-0.15171	0.0818183	0.000922925	0.00173049
	rh_G_and_S_subcentral	1995	717	1270	429	-0.0662356	-0.049547	-0.0144444	-0.10641	-0.109114	0.124274	0.772341	-0.225878	0.00765067	0.0192646	0.022121	-0.0765764	-0.000500275	0.0134064	-0.0484001	-0.138071	0.0517743	0.238959	-0.254836	-0.0213071	0.0483312	0.060414	-0.0351873	-0.030796	0.019123	-0.0215995	-0.0451242	0.524996	0.891778	-0.161889	0.0716401	0.00148611	0.00342949	-0.0491594	-0.0253833	0.0186058	0.0435082	0.00111743	0.987441	0.999427	-0.115647	0.117882	0.000165011	0.0011686
	lh_S_central	1995	717	1270	429	-0.0482876	-0.0521642	0.0211654	-0.121713	-0.139602	0.0492333	0.7385	-0.256366	-0.0228376	0.0505344	0.0531941	-0.014446	-0.0635512	0.0507403	-0.0676418	-0.0693391	0.32868	0.546554	-0.186103	0.0474252	0.00427575	0.0102618	-0.0354756	-0.0149475	0.0676518	-0.00253197	-0.0908291	0.200719	0.744275	-0.207593	0.0259352	0.00998918	0.0130294	0.0165632	-1.78483e-05	0.0384001	0.0600097	0.0382455	0.590051	0.999427	-0.0785189	0.15501	0.0010793	0.00190464
	rh_S_central	1995	717	1270	429	-0.0366487	-0.0704797	0.0152788	-0.0925046	-0.0741183	0.296439	0.908281	-0.190883	0.0426461	0.00520118	0.00725747	0.00195333	-0.0336116	0.00820369	-0.00240576	0.0249679	0.725047	0.820808	-0.0917964	0.141732	0.000567886	0.00383201	-0.0236232	-0.0140486	0.0298872	0.0612269	0.0218294	0.758455	0.938029	-0.094935	0.138594	0.000485583	0.00213545	0.0278877	0.0204598	0.0170008	0.111483	0.102378	0.149248	0.999427	-0.0143864	0.219142	0.0152296	0.0163175
	lh_G_pariet_inf_Supramar	1995	717	1270	429	-0.0292276	-0.0267099	0.0169822	0.00658768	-0.0129157	0.855628	0.960211	-0.12968	0.103849	0.000308174	0.0016842	-0.0674613	0.0558232	0.00855225	0.00855751	-0.12344	0.0820537	0.294091	-0.240204	-0.0066756	0.0309252	0.0412336	-0.0458758	0.0480849	0.0151667	-0.00546387	-0.114662	0.10626	0.708397	-0.231426	0.00210249	0.0232392	0.0268144	-0.0333106	0.000435776	0.00358966	0.0263354	-0.0110069	0.876779	0.999427	-0.127771	0.105757	0.000279044	0.0011686
	rh_G_pariet_inf_Supramar	1995	717	1270	429	-0.0457511	-0.0713634	0.0720507	-0.0336975	-0.0801842	0.258666	0.908281	-0.196949	0.0365802	0.00663	0.00846383	-0.0813776	-0.00766115	-0.0124635	0.00975184	-0.0516803	0.466602	0.622136	-0.168445	0.065084	0.0019995	0.00749812	-0.0246083	-0.0565568	0.0204343	0.0134559	0.0250235	0.72446	0.938029	-0.0917408	0.141788	0.000569454	0.00213545	-0.0286175	-0.0250109	0.0368264	0.0423772	0.00195047	0.97808	0.999427	-0.114814	0.118715	0.000172599	0.0011686
	lh_G_parietal_sup	1995	717	1270	429	-0.0442708	-0.0377972	0.0451771	0.0015107	-0.0501817	0.479625	0.924858	-0.166946	0.0665827	0.00186967	0.00350563	-0.0379379	-0.0107758	0.0218816	-0.01587	-0.0649364	0.36032	0.55729	-0.181701	0.051828	0.00355654	0.00927793	0.0029872	-0.0315773	0.0509913	-0.00710143	-0.0235621	0.739952	0.938029	-0.140326	0.0932023	0.000529542	0.00213545	0.0173282	-0.051279	0.0253886	0.037171	0.080448	0.257102	0.999427	-0.0363163	0.197212	0.00669936	0.0078816
	rh_G_parietal_sup	1995	717	1270	429	-0.0367149	-0.0141611	0.0484176	-0.11634	-0.187894	0.00812448	0.487469	-0.304658	-0.0711296	0.168677	0.168677	-0.0678766	-0.0168731	0.0536805	-0.0668759	-0.171814	0.0155059	0.16477	-0.288579	-0.0550501	0.117827	0.124029	-0.0362764	-0.0242361	0.0451775	-0.0203058	-0.0775683	0.274525	0.748705	-0.194333	0.039196	0.005976	0.00919385	-0.0223681	-0.0625482	0.0236592	0.0371968	0.0538084	0.448453	0.999427	-0.0629559	0.170573	0.00219793	0.00311698
	lh_S_intrapariet_and_P_trans	1995	717	1270	429	-0.00574143	-0.0135113	0.0430272	0.00991954	-0.0253633	0.720874	0.960211	-0.142128	0.0914011	0.000579122	0.00213468	-0.0380205	-0.00732938	0.00476302	0.0133898	-0.0220818	0.755751	0.824455	-0.138846	0.0946825	0.00049177	0.00383201	-0.0259058	-0.0171762	0.0392686	0.00773545	-0.0402869	0.570361	0.891778	-0.157051	0.0764774	0.00118785	0.00296963	-0.0239507	-0.0644304	0.00360721	0.102592	0.139912	0.0487322	0.999427	0.0231472	0.256676	0.0509898	0.0509898
	rh_S_intrapariet_and_P_trans	1995	717	1270	429	-0.0428259	-0.0229252	0.0330207	-0.0548306	-0.107841	0.128724	0.772341	-0.224606	0.00892308	0.0184393	0.0216934	-0.0660779	0.0120043	0.0218086	-0.0727637	-0.172884	0.0148751	0.16477	-0.289648	-0.0561195	0.120829	0.124996	-0.0454564	-0.0301949	0.0144064	-0.0259324	-0.0556293	0.433247	0.891778	-0.172394	0.0611351	0.00238171	0.00408293	-0.0350528	-0.0281656	0.035471	0.0291799	-0.0131919	0.852575	0.999427	-0.129956	0.103572	0.000312617	0.0011686
	lh_G_oc_temp_lat_fusifor	1995	717	1270	429	-0.0376901	-0.0197682	-0.0136092	0.0400026	0.0356968	0.615064	0.960211	-0.0810676	0.152461	0.000956553	0.00235544	-0.0555522	0.0424585	-0.0266643	-0.0293346	-0.100766	0.155758	0.363555	-0.21753	0.0159985	0.0143795	0.0236504	-0.0331638	0.0301972	-0.00249152	0.0440658	-0.0167965	0.812958	0.938029	-0.133561	0.0999679	0.000376322	0.00213545	-0.0158744	0.0365497	0.00309684	0.00814503	-0.0473934	0.504371	0.999427	-0.164158	0.069371	0.00164832	0.00247249
	rh_G_oc_temp_lat_fusifor	1995	717	1270	429	-0.0188452	-0.0475508	-0.0276152	-0.0753429	-0.0191244	0.787618	0.960211	-0.135889	0.0976399	0.000423662	0.00181569	-0.0539755	0.00136557	0.0323107	0.00745337	-0.080262	0.258204	0.484132	-0.197026	0.0365023	0.0066504	0.0137595	0.000595166	-0.0461855	0.000887645	-0.0412751	0.00462731	0.948027	0.964095	-0.112137	0.121392	0.000199251	0.00213545	-0.0190621	-0.00942269	0.0243927	0.0170126	-0.0170247	0.810465	0.999427	-0.133789	0.0997397	0.000380735	0.00120715
	lh_G_temporal_middle	1995	717	1270	429	-0.0551312	-0.0722214	-0.0163578	-0.0428035	-0.0093102	0.895655	0.960211	-0.126075	0.107454	0.000255325	0.0016842	-0.0538553	-0.0378779	0.0592277	-0.0456811	-0.121021	0.0882274	0.294091	-0.237786	-0.00425712	0.0286225	0.0399384	-0.0203605	-0.0707786	0.0614922	0.0232218	0.0121901	0.863657	0.952787	-0.104574	0.128954	0.000296782	0.00213545	-0.0223145	-0.0396108	0.0758199	0.0446023	-0.0140204	0.843432	0.999427	-0.130785	0.102744	0.000326302	0.0011686
	rh_G_temporal_middle	1995	717	1270	429	-0.0595277	0.00606383	0.0139007	-0.000213119	-0.0797768	0.261093	0.908281	-0.196541	0.0369876	0.00652416	0.00846383	-0.0759135	-0.0442869	0.0395628	-0.0258226	-0.0971558	0.171115	0.366676	-0.21392	0.0196086	0.0126226	0.0229501	-0.0365145	-0.0531828	0.0403121	0.0260517	0.00242592	0.972739	0.972739	-0.114338	0.11919	0.000177075	0.00213545	0.00139641	-0.0140665	0.056196	0.0171633	-0.0236265	0.739266	0.999427	-0.140391	0.0931379	0.000531246	0.0014849
	lh_G_and_S_cingul_Ant	1995	717	1270	429	-0.065416	-0.0486838	-0.00909345	-0.0263082	-0.0340078	0.631891	0.960211	-0.150772	0.0827565	0.000882422	0.00235544	-0.0660365	0.0311538	0.0311594	-0.0348727	-0.163353	0.0213834	0.16477	-0.280117	-0.0465886	0.095927	0.104648	-0.0419684	-0.000484423	0.0421587	0.0028097	-0.0808826	0.254541	0.744275	-0.197647	0.0358818	0.00681499	0.00950929	-0.0105356	-0.0216231	0.0285021	0.0198328	0.00241599	0.97285	0.999427	-0.114348	0.11918	0.00017698	0.0011686
	rh_G_and_S_cingul_Ant	1995	717	1270	429	-0.0549396	-0.0513252	-0.020529	-0.0273131	-0.0104128	0.883381	0.960211	-0.127177	0.106352	0.000270514	0.0016842	-0.066953	-0.0239264	0.00198747	-0.0173406	-0.0624521	0.378989	0.55729	-0.179216	0.0543122	0.00320051	0.00902088	-0.0484456	-0.0595576	0.0435561	-0.00682588	-0.039265	0.580178	0.891778	-0.156029	0.0774993	0.00113232	0.00295388	-0.0197333	-0.0485879	0.036886	-0.0314107	-0.0394334	0.578555	0.999427	-0.156198	0.077331	0.0011413	0.00195652
	lh_G_and_S_cingul_Mid_Ant	1995	717	1270	429	-0.0449802	-0.0868353	-0.0153301	-0.0568296	0.00048434	0.994556	0.994556	-0.11628	0.117249	0.000159454	0.0016842	-0.0329149	-0.0144623	0.0303285	-0.049461	-0.0983027	0.166118	0.366676	-0.215067	0.0184616	0.0131595	0.0232226	-0.0111153	-0.0460672	0.0298097	0.00286639	0.00803192	0.909915	0.957806	-0.108732	0.124796	0.000238711	0.00213545	-0.00388253	-0.0476116	0.0440464	0.0274639	0.027161	0.702005	0.999427	-0.0896034	0.143925	0.000632853	0.00163803
	rh_G_and_S_cingul_Mid_Ant	1995	717	1270	429	-0.0339659	-0.0550729	-0.0299593	0.0413331	0.0924747	0.192682	0.8893	-0.0242896	0.209239	0.0106233	0.0132792	-0.0601695	-0.0464003	0.000418134	-0.00883454	-0.0230615	0.745283	0.824455	-0.139826	0.0937029	0.000516478	0.00383201	-0.0518911	-0.0935535	0.0149478	0.0533273	0.0803191	0.257865	0.744275	-0.0364452	0.197084	0.0066654	0.00950929	-0.018626	-0.0595409	0.00484917	0.0279	0.0640413	0.366979	0.999427	-0.0527231	0.180806	0.00342436	0.00428044
	lh_G_and_S_cingul_Mid_Post	1995	717	1270	429	-0.044121	-0.0498202	0.0249105	-0.0900796	-0.109528	0.12285	0.772341	-0.226293	0.00723599	0.0195402	0.022121	-0.0500741	-0.0731412	0.000593948	-0.00421588	0.0183462	0.796066	0.852928	-0.0984182	0.135111	0.000407254	0.00383201	-0.0375887	-0.0211212	-0.0283153	0.0145376	0.0263794	0.710186	0.938029	-0.0903849	0.143144	0.000608953	0.00214925	-0.0185587	-0.0115916	-0.00840407	0.0212047	0.0226434	0.749745	0.999427	-0.094121	0.139408	0.000505796	0.0014849
	rh_G_and_S_cingul_Mid_Post	1995	717	1270	429	-0.0334294	-0.0688174	-0.00431284	0.00454363	0.044341	0.532215	0.924858	-0.0724234	0.161105	0.00143359	0.00318576	-0.0215874	-0.0688037	0.00772712	0.0606643	0.100333	0.157541	0.363555	-0.016431	0.217098	0.0141585	0.0236504	-0.046595	-0.0515922	0.0338628	0.0589458	0.0301478	0.671062	0.938029	-0.0866166	0.146912	0.000732399	0.0021972	-0.0224573	-0.061265	0.0148736	0.0473285	0.07137	0.314711	0.999427	-0.0453944	0.188134	0.00464933	0.0055792
	lh_G_cingul_Post_dorsal	1995	717	1270	429	-0.0459451	-0.0978036	-0.0112759	-0.00903624	0.0543796	0.44365	0.924858	-0.0623847	0.171144	0.00225415	0.00397792	-0.0616555	-0.0544346	0.017906	0.0150576	-0.0100946	0.886921	0.933601	-0.126859	0.10667	0.000266046	0.00383201	-0.0352601	-0.00584086	0.00963414	-0.0116372	-0.0507059	0.475047	0.891778	-0.16747	0.0660584	0.00191419	0.00362308	-0.0213914	-0.0188647	0.0541335	0.0659971	0.00937899	0.894888	0.999427	-0.107385	0.126143	0.000256249	0.0011686
	rh_G_cingul_Post_dorsal	1995	717	1270	429	-0.0572474	-0.0242228	0.0406281	0.0145853	-0.0591468	0.404733	0.924858	-0.175911	0.0576176	0.00277658	0.00462763	-0.0475523	0.00221952	0.0704992	-0.0070897	-0.127514	0.0724497	0.289799	-0.244278	-0.0107495	0.0351496	0.0458474	-0.0396083	0.0411581	0.0967456	-0.0189158	-0.196777	0.00557141	0.334285	-0.313542	-0.0800131	0.202066	0.202066	-0.0310472	0.0174121	0.0670709	0.0256974	-0.0899398	0.205163	0.999427	-0.206704	0.0268245	0.00966044	0.0107338
	lh_G_cingul_Post_ventral	1995	717	1270	429	-0.0236377	-0.0453085	-0.0174608	-0.0340418	0.00510504	0.94267	0.960211	-0.111659	0.121869	0.000204394	0.0016842	-0.0157889	0.0274975	0.0612795	0.0133091	-0.0913411	0.198193	0.410054	-0.208105	0.0254233	0.0101828	0.0190928	-0.030831	-0.00549892	-0.0163345	-0.019575	-0.0285834	0.687204	0.938029	-0.145348	0.088181	0.000678589	0.0021972	-0.00859635	-0.0149106	-0.00306517	-0.000213438	0.0091669	0.897252	0.999427	-0.107597	0.125931	0.00025341	0.0011686
	rh_G_cingul_Post_ventral	1995	717	1270	429	-0.032105	0.00863574	-0.00173328	-0.0345245	-0.0735569	0.300113	0.908281	-0.190321	0.0432075	0.00508394	0.00725747	-0.0270469	0.0425506	0.0656173	-0.0247051	-0.160052	0.0241561	0.16477	-0.276816	-0.0432872	0.0882483	0.0999037	-0.0115561	0.0190829	0.0466241	-0.0263768	-0.103683	0.144133	0.744275	-0.220447	0.0130817	0.015949	0.0191388	0.00924318	0.0256882	0.0377916	0.020181	-0.0340763	0.631206	0.999427	-0.150841	0.0826881	0.00088532	0.00171352
	lh_S_orbital_med_olfact	1995	717	1270	429	-0.0270575	-0.0313584	0.0208478	-0.0988406	-0.115711	0.103099	0.772341	-0.232475	0.00105373	0.0240633	0.0262508	-0.0570149	-0.00518758	0.0198561	-0.0586891	-0.130504	0.066002	0.282866	-0.247269	-0.0137401	0.0385431	0.0492039	-0.0298274	-0.0674234	0.00334581	-0.0231361	0.0112035	0.874596	0.952787	-0.105561	0.127968	0.000281921	0.00213545	-0.0171122	-0.0402897	0.0155142	-0.00773305	-5.09827e-05	0.999427	0.999427	-0.116815	0.116713	0.000155752	0.0011686
	rh_S_orbital_med_olfact	1995	717	1270	429	-0.0135291	-0.0216624	0.0343981	-0.0438168	-0.0701206	0.323258	0.908281	-0.186885	0.0466438	0.0044162	0.00646274	-0.0349807	-0.0091794	0.0379421	-0.0216808	-0.0854599	0.22864	0.44253	-0.202224	0.0313045	0.00814416	0.0162883	-0.0190016	-0.0242183	0.042264	0.0189021	-0.0181657	0.798028	0.938029	-0.13493	0.0985986	0.000403534	0.00213545	-0.0134156	0.0459197	0.105647	0.0696332	-0.095665	0.177778	0.999427	-0.212429	0.0210993	0.0119532	0.0130398
	lh_G_orbital	1995	717	1270	429	-0.0857414	-0.0230227	-0.0018328	-0.0530359	-0.114179	0.107742	0.772341	-0.230943	0.00258585	0.0228674	0.0254083	-0.0721401	0.0322519	0.0557103	0.000871171	-0.159426	0.0247155	0.16477	-0.27619	-0.0426612	0.0868455	0.0999037	-0.0470569	-0.0183307	0.0378787	-0.0341912	-0.10086	0.155371	0.744275	-0.217625	0.0159041	0.0144281	0.0176671	-0.0290914	-0.0125292	0.027134	0.0307065	-0.0129943	0.854759	0.999427	-0.129759	0.10377	0.000309433	0.0011686
	rh_G_orbital	1995	717	1270	429	-0.0710627	-0.0474596	0.00959464	-0.0622783	-0.0956413	0.177885	0.8893	-0.212406	0.021123	0.0119428	0.0146238	-0.0590151	0.045213	0.038151	0.0361207	-0.106361	0.134056	0.363555	-0.223125	0.0104036	0.0175172	0.0269495	-0.0391556	0.0218344	0.0409599	-0.0532925	-0.155339	0.0286508	0.708397	-0.272104	-0.0385751	0.0780953	0.079419	0.0042469	0.00186673	0.0292241	0.0245545	-0.00229275	0.974235	0.999427	-0.119057	0.114472	0.00017581	0.0011686
	lh_G_rectus	1995	717	1270	429	-0.0768503	-0.0440576	0.0266686	-0.108531	-0.168551	0.0175791	0.527372	-0.285315	-0.0517865	0.108995	0.110842	-0.0296307	0.00903803	0.0258046	-0.0487276	-0.113254	0.110622	0.331865	-0.230019	0.00351019	0.0221705	0.0324446	-0.0167	0.0233169	-0.00394639	-0.0148388	-0.0509162	0.473218	0.891778	-0.167681	0.0658482	0.00193231	0.00362308	0.0189782	0.016979	0.0133427	-0.0206732	-0.0320197	0.651946	0.999427	-0.148784	0.0847446	0.000801945	0.001659
	rh_G_rectus	1995	717	1270	429	-0.0438542	-0.0840863	-0.018014	-0.0221784	0.0362368	0.609725	0.960211	-0.0805276	0.153001	0.000981434	0.00235544	-0.072639	-0.017488	-0.0429905	0.0161289	0.00386994	0.956524	0.961337	-0.112894	0.120634	0.000191344	0.00383201	-0.0200363	-0.0667727	-0.014392	0.0437901	0.105044	0.138939	0.744275	-0.01172	0.221809	0.0167306	0.0196831	-0.00124817	-0.0197401	0.0487678	0.00161073	-0.0287012	0.685983	0.999427	-0.145466	0.0880631	0.000682512	0.00163803
	lh_S_circular_insula_ant	1995	717	1270	429	-0.0413529	0.0266663	0.0404812	0.0410464	-0.0674831	0.341792	0.908281	-0.184247	0.0492813	0.00395804	0.00608929	-0.0348133	0.019564	0.0145721	0.0939016	0.0252121	0.722469	0.820808	-0.0915523	0.141976	0.000574801	0.00383201	-0.0437278	0.0433167	0.0089167	0.0156684	-0.0803468	0.257701	0.744275	-0.197111	0.0364176	0.00667267	0.00950929	-0.0513541	0.036979	-0.0224502	0.0898185	0.02412	0.734024	0.999427	-0.0926443	0.140884	0.000544465	0.0014849
	rh_S_circular_insula_ant	1995	717	1270	429	-0.0141277	-0.0086843	-0.00612909	0.00720825	0.00789341	0.911462	0.960211	-0.108871	0.124658	0.000236973	0.0016842	0.00168005	0.00939134	0.0584318	0.00298507	-0.0632249	0.373119	0.55729	-0.179989	0.0535395	0.00330766	0.00902088	0.00867183	0.0171642	0.0464194	-0.0632602	-0.118291	0.095641	0.708397	-0.235056	-0.00152695	0.0261962	0.0285777	0.0112022	0.0427604	0.018467	-0.0113099	-0.0613632	0.387357	0.999427	-0.178128	0.0554011	0.00305482	0.00398455
	lh_S_circular_insula_inf	1995	717	1270	429	-0.0324936	-0.0732258	-0.0234623	0.00227748	0.0665961	0.348174	0.908281	-0.0501682	0.18336	0.00381382	0.00602182	-0.0185534	0.0197321	0.0414644	0.0406991	-0.0390568	0.582188	0.743219	-0.155821	0.0777075	0.0011213	0.00448578	0.00493704	-0.013996	0.0395947	0.0107973	-0.00988371	0.889267	0.952787	-0.126648	0.106881	0.000263124	0.00213545	0.00595216	0.00222407	0.0518095	0.0170503	-0.0310758	0.661558	0.999427	-0.14784	0.0856885	0.00076615	0.001659
	rh_S_circular_insula_inf	1995	717	1270	429	-0.040178	-0.0642622	0.000432187	-0.0107657	0.0129529	0.855216	0.960211	-0.103811	0.129717	0.000308769	0.0016842	-0.0258651	0.00169786	0.0589345	0.0130305	-0.0735404	0.300221	0.514664	-0.190305	0.0432239	0.00508054	0.0117243	-0.000134089	-0.0256775	0.0267998	-0.0423163	-0.0435988	0.539101	0.891778	-0.160363	0.0731656	0.00138539	0.00332494	-0.0365462	-0.0380122	7.24317e-05	-0.046846	-0.0454847	0.521691	0.999427	-0.162249	0.0712797	0.00151087	0.00238558
	lh_G_cuneus	1995	717	1270	429	-0.0460335	-0.0408215	0.0130878	-0.0603764	-0.0787603	0.267218	0.908281	-0.195525	0.038004	0.00626658	0.00835544	-0.0381618	0.00352762	0.0529635	-0.0222627	-0.116987	0.0993533	0.313747	-0.233752	-0.000223133	0.0250996	0.0358566	-0.0467561	0.0389126	0.03456	-0.00456933	-0.124866	0.0785817	0.708397	-0.24163	-0.00810123	0.032353	0.0340558	-0.000576884	0.0191919	0.0510806	0.0381574	-0.0327203	0.644849	0.999427	-0.149485	0.0840441	0.000829498	0.001659
	rh_G_cuneus	1995	717	1270	429	-0.0341577	-0.0302335	-0.00914268	-0.060507	-0.0553663	0.435425	0.924858	-0.172131	0.061398	0.00235434	0.00403601	-0.0184587	0.0251306	0.0430405	-0.000543208	-0.0872071	0.219266	0.438532	-0.203971	0.0295573	0.00870867	0.0168555	-0.0268553	-0.00456215	0.0423575	-0.00825602	-0.0729387	0.304193	0.760482	-0.189703	0.0438256	0.00495757	0.0080393	0.00500356	0.00108477	0.0500446	0.0373254	-0.00882482	0.901066	0.999427	-0.125589	0.10794	0.000248894	0.0011686
	lh_Lat_Fis_post	1995	717	1270	429	-0.00304962	-0.0823167	-0.0086668	-0.028224	0.0598893	0.398861	0.924858	-0.0568751	0.176654	0.00286713	0.00464941	-0.0244242	0.0350107	0.0436673	0.0480568	-0.0550553	0.438008	0.597284	-0.17182	0.0617091	0.00232232	0.00819644	0.00907202	0.0137672	0.0207759	0.0302629	0.00479743	0.946119	0.964095	-0.111967	0.121562	0.000201068	0.00213545	0.00331538	-0.0185859	0.0151453	0.0751383	0.0820371	0.247823	0.999427	-0.0347273	0.198801	0.00713078	0.00822782
	rh_Lat_Fis_post	1995	717	1270	429	-0.0551072	-0.0627299	0.0128579	-0.0294453	-0.0346631	0.625339	0.960211	-0.151427	0.0821012	0.000910534	0.00235544	-0.0369962	-0.0339874	0.0434235	0.0188513	-0.0276099	0.697321	0.820378	-0.144374	0.0891544	0.000646972	0.00388183	-0.0186989	-0.0727459	0.0522536	0.0454088	0.0473124	0.505099	0.891778	-0.0694519	0.164077	0.00164227	0.00344583	-0.0209438	-0.0679816	0.0383101	0.0788393	0.0878142	0.216074	0.999427	-0.0289501	0.204579	0.00891271	0.0100899
Cortical Volume	lh_S_front_sup	1995	717	1270	429	-0.0549783	-0.0634264	-0.00225382	-0.0304465	-0.0197242	0.781125	0.977298	-0.136489	0.0970402	0.000436723	0.00187167	-0.0469334	0.00367345	0.0556737	0.00266868	-0.103704	0.14405	0.278807	-0.220468	0.0130604	0.015961	0.0313627	-0.0410844	-0.00205715	0.060103	0.0554631	-0.0437059	0.538104	0.982036	-0.16047	0.0730585	0.00139226	0.00269469	0.0249029	0.035534	0.0225989	0.0507455	0.0175455	0.804782	0.973122	-0.0992188	0.13431	0.000390989	0.00140704
	rh_S_front_sup	1995	717	1270	429	-0.0336674	0.00383807	-0.0255104	-0.0442516	-0.0562827	0.427864	0.9433	-0.173047	0.0604816	0.00245098	0.00408497	-0.0349899	0.0121304	0.061974	-0.0780121	-0.18736	0.00830707	0.143253	-0.304124	-0.0705954	0.166789	0.169616	-0.049415	0.0401589	0.0385463	-0.0486881	-0.176928	0.0126893	0.761357	-0.293692	-0.0601634	0.132664	0.132664	-0.00705847	0.0729743	0.0308673	0.00314602	-0.107894	0.128537	0.973122	-0.224658	0.00887045	0.0184729	0.0191099
	lh_G_front_sup	1995	717	1270	429	-0.0352361	-0.0113719	-0.0171045	-0.0625347	-0.0693885	0.328336	0.936592	-0.186153	0.0473759	0.0042845	0.00598237	-0.0709575	0.0210224	0.0564585	-0.00260348	-0.151225	0.0331475	0.154176	-0.267989	-0.0344602	0.0699764	0.0850093	-0.0577012	-0.0364533	0.0668435	0.0536527	-0.034535	0.626618	0.982036	-0.151299	0.0822294	0.000904973	0.00187236	-0.0145168	-0.0192047	0.0592805	-0.00928641	-0.0639475	0.367681	0.973122	-0.180712	0.0528168	0.00341077	0.00454769
	rh_G_front_sup	1995	717	1270	429	-0.0342728	-0.0125869	-0.01773	-0.00532517	-0.00929206	0.895857	0.977298	-0.126056	0.107472	0.000255082	0.00164077	-0.0219337	0.00277709	0.022286	-0.0141187	-0.0611236	0.389213	0.598789	-0.177888	0.0556407	0.00302357	0.00794198	-0.00812274	0.0138594	0.0239978	0.0514829	0.00554278	0.937764	0.982036	-0.111222	0.122307	0.000209215	0.00117797	-0.0143831	0.0184481	0.0243184	0.041845	-0.0152881	0.829485	0.973122	-0.132052	0.101476	0.000348322	0.00140704
	lh_S_front_inf	1995	717	1270	429	0.0105426	0.00465891	0.00200152	-0.0443309	-0.0404774	0.56854	0.9433	-0.157242	0.0762869	0.00119848	0.00239695	-0.0503442	-0.00432361	0.0324922	-0.0796907	-0.158427	0.0256315	0.154176	-0.275191	-0.0416624	0.0846419	0.095821	-0.0348691	-0.0233141	0.040475	0.0462592	-0.00576975	0.935221	0.982036	-0.122534	0.110995	0.000211757	0.00117797	-0.0197155	-0.00685968	0.0517764	-0.0240735	-0.0887592	0.211173	0.973122	-0.205524	0.0280051	0.00923864	0.0102652
	rh_S_front_inf	1995	717	1270	429	-0.0543441	-0.00714135	0.0288088	-0.0698886	-0.146076	0.0396131	0.792262	-0.26284	-0.0293113	0.0607512	0.062846	-0.057934	-0.0117276	0.0435178	-0.0798843	-0.169871	0.0167128	0.143253	-0.286635	-0.0531067	0.112509	0.12501	-0.0432905	-0.00531562	0.0314574	-0.0465645	-0.116068	0.10204	0.832419	-0.232832	0.00069651	0.0243495	0.0265631	-0.0152881	-0.00201048	0.00449657	0.0408138	0.0230611	0.745287	0.973122	-0.0937033	0.139825	0.000516467	0.00147562
	lh_G_front_middle	1995	717	1270	429	-0.0492668	0.024856	-0.00490512	0.0157464	-0.053515	0.450931	0.9433	-0.170279	0.0632493	0.00216955	0.00371924	-0.0697959	0.0282487	0.0481889	-0.0291149	-0.175515	0.0134182	0.143253	-0.29228	-0.0587508	0.128442	0.135202	-0.0505406	0.0105762	0.041347	0.0279747	-0.0745488	0.293642	0.948767	-0.191313	0.0422156	0.00529273	0.00721736	-0.00702297	0.0179528	0.039411	-0.0142342	-0.0786445	0.267922	0.973122	-0.195409	0.0381199	0.0062378	0.00748536
	rh_G_front_middle	1995	717	1270	429	-0.0453665	-0.0478089	0.00156677	-0.0121475	-0.0112671	0.87389	0.977298	-0.128031	0.105497	0.000282858	0.00164077	-0.0284136	2.79577e-05	0.046057	-0.0598496	-0.13446	0.0582075	0.174623	-0.251224	-0.0176957	0.0434366	0.0635658	-0.032732	-0.00483658	0.0396525	-0.00676998	-0.0743504	0.294929	0.948767	-0.191115	0.0424139	0.00525037	0.00721736	-0.00341758	-0.0200072	0.051198	0.00833048	-0.0263199	0.710811	0.973122	-0.143084	0.0904445	0.000607166	0.00151791
	lh_S_front_middle	1995	717	1270	429	-0.0697463	-0.00628591	-0.0290408	0.014907	-0.0196166	0.782288	0.977298	-0.136381	0.0971477	0.000434354	0.00187167	-0.0576033	-0.0373114	0.025602	0.0443898	-0.00152706	0.982838	0.993062	-0.118291	0.115237	0.000168702	0.00227015	-0.0194598	-0.0243864	-0.00762226	0.0456516	0.0582347	0.412017	0.982036	-0.0585296	0.174999	0.00266889	0.00432793	0.0187444	0.0324079	0.0288457	0.0367097	-0.00580003	0.934881	0.973122	-0.122564	0.110964	0.000212098	0.00140704
	rh_S_front_middle	1995	717	1270	429	-0.0385114	-0.0741605	-0.0409217	-0.0803486	-0.00381116	0.957184	0.988965	-0.120576	0.112953	0.000190743	0.00164077	-0.0397504	0.0158411	-0.017124	-0.0785232	-0.117173	0.0988176	0.228041	-0.233938	-0.000408861	0.0252534	0.0422784	-0.027365	-0.019306	-0.0459345	-0.0248599	0.0130383	0.854272	0.982036	-0.103726	0.129803	0.000310139	0.00126727	-0.00135601	-0.0292423	-0.052474	0.0167805	0.097199	0.170925	0.973122	-0.0195654	0.213963	0.0126424	0.0137918
	lh_G_front_inf_Orbital	1995	717	1270	429	0.0174054	-0.0299322	0.0308896	-0.00432106	0.0121278	0.864347	0.977298	-0.104637	0.128892	0.000295822	0.00164077	-0.0262473	0.0432497	0.0365668	-0.032554	-0.138679	0.0507534	0.171894	-0.255443	-0.0219143	0.049196	0.0670854	-0.0322511	0.0166362	0.0383383	0.00666846	-0.0805886	0.256272	0.948767	-0.197353	0.0361758	0.00673657	0.00878683	-0.0456712	0.0518253	-0.00919884	0.0594462	-0.0288592	0.684347	0.973122	-0.145624	0.0879051	0.000687805	0.00158724
	rh_G_front_inf_Orbital	1995	717	1270	429	-0.0262782	-0.0352391	0.0237747	0.0291888	0.0143873	0.83939	0.977298	-0.102377	0.131152	0.000332538	0.00166269	0.0320684	-0.0274644	0.0271857	-0.0197864	0.0125693	0.859459	0.969814	-0.104195	0.129334	0.000302687	0.00227015	0.00532996	0.000470227	0.00936979	0.00851135	0.00400128	0.95505	0.982036	-0.112763	0.120766	0.000192694	0.00117797	0.00426729	0.0191863	0.0169562	0.0264307	-0.00544228	0.93889	0.973122	-0.122207	0.111322	0.000208099	0.00140704
	lh_S_precentral_inf_part	1995	717	1270	429	-0.0346615	-0.023019	-0.0289626	0.0547331	0.0721061	0.309746	0.936592	-0.0446582	0.18887	0.00479178	0.00638904	-0.028738	0.00824331	0.0618968	-0.115142	-0.214621	0.00249994	0.143253	-0.331385	-0.0978562	0.279977	0.279977	-0.0136196	-0.00917353	0.0538732	-0.0702748	-0.128763	0.0696967	0.832419	-0.245527	-0.0119986	0.0365359	0.0384588	-0.00332006	0.0331544	0.0418088	-0.0432311	-0.121578	0.0867748	0.973122	-0.238342	-0.00481352	0.0291392	0.0291392
	rh_S_precentral_inf_part	1995	717	1270	429	-0.0106855	0.00199525	0.0213948	-0.00409833	-0.0381776	0.590711	0.9433	-0.154942	0.0785867	0.00107585	0.0023579	-0.0289433	-0.0040108	0.0525337	-0.0797802	-0.157473	0.0265335	0.154176	-0.274237	-0.0407085	0.0825766	0.0952807	-0.0201692	0.030053	0.0392008	-0.0265826	-0.116044	0.102112	0.832419	-0.232808	0.000720641	0.0243301	0.0265631	0.0244173	-0.0133582	0.0365012	-0.0404933	-0.0392518	0.580306	0.973122	-0.156016	0.0775126	0.00113162	0.00193003
	lh_S_precentral_sup_part	1995	717	1270	429	-0.0721615	-0.0305098	-0.0201312	-0.089378	-0.111251	0.117071	0.878032	-0.228015	0.00551336	0.0207214	0.0234582	-0.0707587	-0.0386745	0.0602149	-0.0436294	-0.136128	0.0551576	0.174182	-0.252893	-0.019364	0.0456455	0.0652079	-0.0535906	0.0319785	0.0176224	0.0181733	-0.0850803	0.230714	0.948767	-0.201845	0.0316841	0.00802585	0.0102458	-0.00270097	0.0132847	0.0359197	0.0131779	-0.038743	0.585224	0.973122	-0.155507	0.0780214	0.00110488	0.00193003
	rh_S_precentral_sup_part	1995	717	1270	429	-0.0788108	0.0205019	-0.0242463	0.0383721	-0.0368374	0.603812	0.9433	-0.153602	0.079927	0.00100981	0.0023579	-0.0399737	-0.0208788	0.0387364	-0.026822	-0.0846974	0.232819	0.423307	-0.201462	0.0320669	0.00790807	0.0169459	-0.0145037	0.0310399	0.0305577	0.0715785	-0.00442076	0.950344	0.982036	-0.121185	0.112344	0.000197065	0.00117797	0.00481949	0.0347359	0.0165433	0.0510485	0.00461784	0.948133	0.973122	-0.112147	0.121382	0.00019915	0.00140704
	lh_G_precentral	1995	717	1270	429	-0.0734735	0.0543677	-0.0295514	-0.0580241	-0.156557	0.0274255	0.792262	-0.273321	-0.0397925	0.0806293	0.0819959	-0.0293611	-0.0375748	0.0582989	-0.0653164	-0.115552	0.103573	0.230163	-0.232316	0.00121265	0.0239368	0.0422415	-0.0415961	-0.0139541	0.0566736	-0.0206957	-0.105098	0.138737	0.832419	-0.221863	0.0116662	0.0167622	0.0197202	-0.0055459	0.0111006	0.0626934	0.00654892	-0.0728737	0.304624	0.973122	-0.189638	0.0438906	0.00494444	0.00618055
	rh_G_precentral	1995	717	1270	429	-0.0591891	0.0178325	-0.018884	-0.0399828	-0.0982106	0.166515	0.908266	-0.214975	0.0185538	0.0131156	0.0157387	-0.0263518	-0.0420304	0.0350445	-0.0991918	-0.118881	0.0939997	0.228041	-0.235645	-0.00211633	0.0267049	0.0433052	-0.0275566	-0.00661554	0.0326001	-0.0182808	-0.0718425	0.311518	0.948767	-0.188607	0.0449219	0.00474032	0.00677188	-0.00250383	0.0354413	0.0392408	0.0335306	-0.0436778	0.538366	0.973122	-0.160442	0.0730866	0.00139045	0.00213916
	lh_G_postcentral	1995	717	1270	429	-0.035615	-0.0233453	-0.00737405	-0.0644091	-0.0694046	0.328223	0.936592	-0.186169	0.0473597	0.00428737	0.00598237	-0.0252228	-0.0804156	0.0515285	-0.00440464	-0.000617305	0.993062	0.993062	-0.117382	0.116147	0.000160606	0.00227015	-0.0259526	-0.0342331	0.0802158	0.072783	0.000811448	0.99088	0.99088	-0.115953	0.117576	0.000162303	0.00117797	-0.00857728	-0.00613122	0.0887446	0.0516354	-0.0397435	0.575572	0.973122	-0.156508	0.0770209	0.00115802	0.00193003
	rh_G_postcentral	1995	717	1270	429	-0.0178838	-0.0681796	0.017815	-0.0213799	0.0111999	0.874636	0.977298	-0.105564	0.127964	0.000281868	0.00164077	-0.0079304	-0.0789327	0.0458276	-0.0285046	-0.00320529	0.963986	0.993062	-0.11997	0.113559	0.000184648	0.00227015	0.0147617	-0.056379	0.0334429	0.0422458	0.0800171	0.259659	0.948767	-0.0367472	0.196782	0.00658643	0.00878191	0.0111792	0.00563931	0.0399171	0.0175575	-0.0168388	0.812496	0.973122	-0.133603	0.0999256	0.000377136	0.00140704
	lh_S_postcentral	1995	717	1270	429	-0.0470303	-0.00338123	0.0513283	0.0277938	-0.0672562	0.343417	0.936592	-0.184021	0.0495081	0.0039207	0.00579868	-0.0500815	-0.0612174	-0.00161587	0.00338027	0.0161667	0.819849	0.945979	-0.100598	0.132931	0.000364386	0.00233258	-0.0402962	-0.0713874	0.0124563	0.00389824	0.0226324	0.749862	0.982036	-0.094132	0.139397	0.000505517	0.00158995	-0.018551	-0.0500251	0.00118041	0.0579607	0.088359	0.213239	0.973122	-0.0284054	0.205123	0.00909935	0.0102652
	rh_S_postcentral	1995	717	1270	429	-0.0753582	-0.0544672	0.0627065	-0.00987544	-0.0936448	0.187112	0.935561	-0.210409	0.0231195	0.0110953	0.0135861	-0.0718365	-0.108379	0.030912	-0.0143809	-0.00845788	0.90516	0.969814	-0.125222	0.108306	0.000244132	0.00227015	-0.0336762	-0.0959944	0.0247322	-0.031016	0.00683879	0.923252	0.982036	-0.109926	0.123603	0.00022412	0.00117797	-0.0176231	-0.034311	0.0186401	0.0373736	0.0354483	0.617527	0.973122	-0.0813161	0.152213	0.000945298	0.00184226
	lh_G_and_S_subcentral	1995	717	1270	429	-0.0575398	-0.0329929	-0.0196917	0.0375795	0.0326929	0.645126	0.9433	-0.0840714	0.149457	0.000828406	0.00225929	-0.0669996	-0.0291067	0.0444032	-0.0269004	-0.109325	0.123548	0.264746	-0.226089	0.00743981	0.0194043	0.0352806	-0.0453064	-0.0540628	0.0208062	-0.00141878	-0.0134498	0.849727	0.982036	-0.130214	0.103315	0.000316819	0.00126727	-0.0086505	-0.0209037	0.0395475	-0.0110706	-0.0383831	0.588714	0.973122	-0.155147	0.0783813	0.00108632	0.00193003
	rh_G_and_S_subcentral	1995	717	1270	429	-0.0564812	-0.0489059	-0.0377074	-0.0677234	-0.0376985	0.595379	0.9433	-0.154463	0.0790658	0.0010518	0.0023579	-0.0476641	-0.0267782	0.00885445	-0.0437366	-0.0735349	0.300257	0.529866	-0.190299	0.0432295	0.0050794	0.0112875	-0.0178141	-0.0781987	-0.00542826	0.003933	0.069904	0.324754	0.948767	-0.0468603	0.186668	0.00437687	0.00640518	-0.0235621	-0.0330435	0.0292702	0.039358	0.0195889	0.782588	0.973122	-0.0971754	0.136353	0.000433745	0.00142767
	lh_S_central	1995	717	1270	429	-0.056747	-0.0388557	0.000404202	-0.0957227	-0.114354	0.107203	0.878032	-0.231118	0.00241075	0.0230015	0.0255572	-0.0126306	-0.0781205	0.0477772	-0.0789542	-0.0612838	0.387972	0.598789	-0.178048	0.0554806	0.00304442	0.00794198	-0.00292606	-0.0290273	0.0578965	0.0367542	0.00491888	0.944757	0.982036	-0.111845	0.121683	0.000202375	0.00117797	0.0319256	0.011664	0.0379603	0.0456865	0.0280117	0.693138	0.973122	-0.0887527	0.144776	0.000659853	0.00158365
	rh_S_central	1995	717	1270	429	-0.0248341	-0.0832745	-0.00712045	-0.0659776	-0.000324435	0.996353	0.996353	-0.117089	0.11644	0.000158078	0.00164077	-0.00727765	-0.0684553	0.0101976	-0.0336406	0.0174335	0.806004	0.945979	-0.0993308	0.134198	0.000388763	0.00233258	-0.0144446	-0.0402583	0.0243238	0.0866438	0.0883674	0.213195	0.948767	-0.028397	0.205132	0.00910225	0.0113778	0.0142261	0.0145492	0.0078428	0.0754588	0.0674364	0.342126	0.973122	-0.0493279	0.184201	0.00395033	0.00515261
	lh_G_pariet_inf_Supramar	1995	717	1270	429	-0.0124571	-0.0127361	0.0202937	0.0136012	-0.00641539	0.927991	0.978387	-0.12318	0.110349	0.000219145	0.00164077	-0.06292	0.0353558	0.0368738	0.0106918	-0.124572	0.0792866	0.209272	-0.241336	-0.0078077	0.0320547	0.0493149	-0.0425598	0.0212449	0.0288352	0.0029179	-0.0897589	0.206076	0.948767	-0.206523	0.0270054	0.00959474	0.0117487	-0.0370499	-0.0208397	-0.00108557	0.0208739	0.00573837	0.935572	0.973122	-0.111026	0.122503	0.000211404	0.00140704
	rh_G_pariet_inf_Supramar	1995	717	1270	429	-0.0244348	-0.0604078	0.0472571	-0.0201085	-0.0313618	0.658639	0.9433	-0.148126	0.0854025	0.000776838	0.00225929	-0.0593244	-0.0163869	0.00798293	-0.00835211	-0.0593412	0.403191	0.604786	-0.176106	0.0574232	0.00280004	0.00794198	-0.0178829	-0.0466836	0.0340307	0.0555084	0.0503543	0.478114	0.982036	-0.0664101	0.167119	0.00188423	0.0032301	-0.0267515	-0.00138729	0.0213862	0.0567984	0.0100995	0.886866	0.973122	-0.106665	0.126864	0.000266115	0.00140704
	lh_G_parietal_sup	1995	717	1270	429	-0.0139765	-0.0170345	0.0456274	0.0179928	-0.0246057	0.728878	0.971837	-0.14137	0.0921587	0.000557768	0.00202246	-0.0337774	0.00239513	0.043764	-0.0131743	-0.0931525	0.189441	0.355202	-0.209917	0.0236119	0.0108945	0.0225404	-0.00631688	-0.0447551	0.0582672	0.0248816	0.00502151	0.943606	0.982036	-0.111743	0.121786	0.000203486	0.00117797	0.0132511	-0.0643494	0.0348138	0.0129733	0.0558365	0.431536	0.973122	-0.0609279	0.172601	0.00240348	0.00335369
	rh_G_parietal_sup	1995	717	1270	429	-0.0246779	0.00438232	0.0395255	-0.0475332	-0.11618	0.101708	0.878032	-0.232945	0.000583946	0.0244403	0.026186	-0.045031	0.0269998	0.0590159	-0.0479713	-0.17916	0.0116086	0.143253	-0.295925	-0.0623961	0.13953	0.144341	-0.0215944	-0.00468851	0.0264429	0.00672411	-0.0366341	0.60581	0.982036	-0.153398	0.0801302	0.00100012	0.00200024	-0.0235154	-0.0192013	0.00226257	0.00158446	-0.00499418	0.943913	0.973122	-0.121759	0.11177	0.000203189	0.00140704
	lh_S_intrapariet_and_P_trans	1995	717	1270	429	-0.00901918	0.0136585	0.0357459	0.0221414	-0.0362948	0.609153	0.9433	-0.153059	0.0804695	0.000984146	0.0023579	-0.0317312	-0.00920948	-0.00648623	0.0507134	0.0347111	0.62486	0.797694	-0.0820532	0.151476	0.000912625	0.00370607	-0.0255321	-0.0184142	0.0482398	0.0439513	-0.011419	0.872204	0.982036	-0.128183	0.105345	0.000285108	0.00126727	-0.0298056	-0.0614286	0.00980626	0.0820781	0.104148	0.142341	0.973122	-0.0126162	0.220913	0.0162126	0.0173707
	rh_S_intrapariet_and_P_trans	1995	717	1270	429	-0.0395119	-0.00071693	0.0209172	-0.019369	-0.0791072	0.265116	0.936592	-0.195872	0.0376571	0.00635346	0.00794182	-0.0530639	0.0209003	0.0303227	-0.0686349	-0.173092	0.0147549	0.143253	-0.289856	-0.0563277	0.12142	0.130092	-0.0322873	-0.00287345	0.00423757	0.00426052	-0.0294021	0.678738	0.982036	-0.146166	0.0873622	0.000706278	0.00183747	-0.0214226	0.00875167	0.0264035	0.0239708	-0.0326121	0.645943	0.973122	-0.149376	0.0841523	0.000825187	0.00176826
	lh_G_oc_temp_lat_fusifor	1995	717	1270	429	-0.0323425	-0.0291453	-0.0113716	0.0230222	0.0311981	0.66031	0.9433	-0.0855663	0.147962	0.000770702	0.00225929	-0.0391102	0.0287465	-0.0025684	-0.00415022	-0.0694665	0.327792	0.561929	-0.186231	0.0472979	0.00429836	0.0099193	-0.0269912	0.0157681	-0.00282873	0.0707109	0.0308907	0.66345	0.982036	-0.0858737	0.147655	0.000759304	0.00183747	-0.00378689	0.0304714	0.0205113	0.0162762	-0.0385042	0.587538	0.973122	-0.155269	0.0782601	0.00109254	0.00193003
	rh_G_oc_temp_lat_fusifor	1995	717	1270	429	-0.0182982	-0.010014	-0.00833411	-0.077171	-0.0772763	0.276336	0.936592	-0.194041	0.039488	0.00590667	0.00754043	-0.0390107	0.00425146	0.0737649	-0.0241334	-0.141319	0.0465076	0.171894	-0.258084	-0.0245549	0.053101	0.0708013	-0.0152782	-0.0556593	0.0349334	-0.00854511	-0.00305542	0.965668	0.982036	-0.11982	0.113709	0.000183168	0.00117797	-0.0314384	-0.0348468	0.0494113	0.0356795	-0.0103448	0.884138	0.973122	-0.127109	0.10642	0.000269553	0.00140704
	lh_G_temporal_middle	1995	717	1270	429	-0.0325242	-0.0518885	-0.00919601	-0.0348651	-0.00628348	0.929467	0.978387	-0.123048	0.110481	0.000217616	0.00164077	-0.0451569	-0.0308129	0.0665988	-0.0230666	-0.104133	0.142398	0.278807	-0.220898	0.0126312	0.0162041	0.0313627	-0.0232389	-0.082172	0.0667327	0.0742173	0.0666366	0.347881	0.948767	-0.0501277	0.183401	0.0038203	0.00587077	-0.0175708	-0.0245824	0.082802	0.0584481	-0.0174625	0.805688	0.973122	-0.134227	0.0993019	0.000389337	0.00140704
	rh_G_temporal_middle	1995	717	1270	429	-0.0356864	0.00301965	0.0216853	-0.0101975	-0.0706078	0.319908	0.936592	-0.187372	0.0461566	0.00450583	0.00614432	-0.0689841	-0.0141276	0.0565964	-0.0265648	-0.138193	0.0515681	0.171894	-0.254958	-0.0214289	0.0485038	0.0670854	-0.0400962	-0.0404752	0.0544444	0.0330167	-0.0210899	0.766396	0.982036	-0.137854	0.0956744	0.000467872	0.00158995	-0.00858358	0.0233257	0.0494889	0.033461	-0.0479696	0.499202	0.973122	-0.164734	0.0687947	0.00169201	0.00253802
	lh_G_and_S_cingul_Ant	1995	717	1270	429	-0.0762822	-0.024932	-0.0233495	-0.0485543	-0.0767323	0.279731	0.936592	-0.193497	0.0400321	0.0057794	0.00753835	-0.0696178	0.0148196	0.0202847	-0.0460026	-0.150874	0.0335573	0.154176	-0.267638	-0.0341095	0.0693157	0.0850093	-0.0533987	-0.0185261	0.0301189	0.013462	-0.0515866	0.467411	0.982036	-0.168351	0.0651778	0.00199114	0.00331857	-0.00525736	-0.0192221	0.0135461	0.0237229	0.0241475	0.733733	0.973122	-0.0926169	0.140912	0.000545209	0.00147615
	rh_G_and_S_cingul_Ant	1995	717	1270	429	-0.0662891	-0.0261957	-0.0257398	-0.0464711	-0.0609438	0.390609	0.9433	-0.177708	0.0558205	0.00300032	0.00486538	-0.0460061	-0.0123132	0.0158966	-0.0989293	-0.148877	0.0359743	0.154176	-0.265641	-0.0321123	0.0656441	0.0838009	-0.0521097	-0.0473311	0.041605	-0.0608614	-0.107356	0.130452	0.832419	-0.224121	0.00940818	0.0181327	0.0205276	-0.0182582	-0.0273408	0.0330698	-0.0480145	-0.0720459	0.31015	0.973122	-0.18881	0.0447185	0.00477998	0.0061021
	lh_G_and_S_cingul_Mid_Ant	1995	717	1270	429	-0.0600077	-0.0505576	-0.00748641	-0.0458452	-0.0478699	0.500094	0.9433	-0.164634	0.0688944	0.00168438	0.00306251	-0.0324175	-0.0217714	0.00951928	-0.0148528	-0.0350275	0.621708	0.797694	-0.151792	0.0817369	0.000926519	0.00370607	-0.0132335	-0.0518379	0.0354609	-0.0334266	-0.0302646	0.669863	0.982036	-0.147029	0.0864997	0.000736572	0.00183747	-0.0114574	-0.0586112	0.0494333	-0.039006	-0.0412789	0.560907	0.973122	-0.158043	0.0754854	0.00124413	0.00201751
	rh_G_and_S_cingul_Mid_Ant	1995	717	1270	429	-0.0331204	-0.0270443	-0.0299614	0.0789723	0.103026	0.146691	0.899071	-0.0137385	0.21979	0.0155833	0.0179807	-0.0675013	-0.041503	0.00743553	-0.029158	-0.0626792	0.377258	0.598789	-0.179444	0.0540851	0.00323167	0.00807917	-0.0582718	-0.072482	0.0202663	0.0537296	0.0477839	0.500865	0.982036	-0.0689805	0.164548	0.00167782	0.00314591	-0.0199733	-0.0558864	-0.0137881	0.0338669	0.0836375	0.238718	0.973122	-0.0331269	0.200402	0.00758988	0.00892927
	lh_G_and_S_cingul_Mid_Post	1995	717	1270	429	-0.0367842	-0.0315516	0.0314284	-0.0654566	-0.102228	0.149845	0.899071	-0.218992	0.0145365	0.0151487	0.017822	-0.0526765	-0.0500781	-0.00234426	-0.0232203	-0.0234855	0.740766	0.888919	-0.14025	0.0932788	0.000527526	0.00276057	-0.0379247	-0.0257489	-0.0218636	0.0131358	0.0228154	0.747908	0.982036	-0.093949	0.13958	0.000510166	0.00158995	-0.0215637	0.000725006	-0.0111094	0.029101	0.017927	0.800626	0.973122	-0.0988374	0.134691	0.000398662	0.00140704
	rh_G_and_S_cingul_Mid_Post	1995	717	1270	429	-0.0428797	-0.055832	0.00511187	-0.0103205	-0.00244872	0.972482	0.988965	-0.119213	0.114316	0.000177292	0.00164077	-0.0196942	-0.0607157	0.0142282	0.0133747	0.0402401	0.570809	0.763538	-0.0765242	0.157004	0.00118526	0.00418325	-0.0538835	-0.00805893	0.0413983	0.0373528	-0.0499284	0.481845	0.982036	-0.166693	0.066836	0.0018485	0.0032301	-0.0198478	-0.0206265	0.0131921	0.0240361	0.0116269	0.869898	0.973122	-0.105137	0.128391	0.000288212	0.00140704
	lh_G_cingul_Post_dorsal	1995	717	1270	429	-0.024292	-0.102662	-0.00487354	0.0321727	0.115785	0.102878	0.878032	-0.000979228	0.232549	0.0241227	0.026186	-0.0427306	-0.047623	0.00814832	0.0145952	0.0113501	0.872969	0.969814	-0.105414	0.128114	0.000284086	0.00227015	-0.0298555	0.0134083	0.00354064	0.0157515	-0.0310613	0.661706	0.982036	-0.147826	0.085703	0.000765613	0.00183747	-0.00506111	0.00697166	0.0581949	0.0482015	-0.0220547	0.756041	0.973122	-0.138819	0.0947096	0.000491102	0.00147331
	rh_G_cingul_Post_dorsal	1995	717	1270	429	-0.041435	-0.027746	0.0315887	0.0328436	-0.0124493	0.860786	0.977298	-0.129214	0.104315	0.000300807	0.00164077	-0.040258	-0.00994461	0.062033	-0.0317281	-0.124186	0.0802208	0.209272	-0.240951	-0.00742197	0.0316661	0.0493149	-0.0467701	0.0127117	0.0824947	-0.0026733	-0.144873	0.0412695	0.832419	-0.261637	-0.0281082	0.058739	0.0597346	-0.0212515	0.0272479	0.0646262	-0.00335876	-0.116585	0.100524	0.973122	-0.233349	0.000179858	0.0247686	0.0251884
	lh_G_cingul_Post_ventral	1995	717	1270	429	-0.0096416	-0.0446487	0.000188568	-0.0610774	-0.0263056	0.710961	0.971837	-0.14307	0.0904587	0.000606739	0.00202246	-0.013335	0.0574717	0.0593473	0.0247778	-0.105505	0.137214	0.278807	-0.22227	0.0112591	0.0170025	0.0318797	-0.0153136	0.0106905	-0.00272697	-0.010998	-0.0342772	0.629195	0.982036	-0.151042	0.0824872	0.000893878	0.00187236	0.00588452	0.00149271	0.00805231	0.00749666	0.00383619	0.956903	0.973122	-0.112928	0.120601	0.000190999	0.00140704
	rh_G_cingul_Post_ventral	1995	717	1270	429	-0.00450979	0.00271655	-0.00155073	-0.0314341	-0.0371201	0.601037	0.9433	-0.153884	0.0796442	0.00102342	0.0023579	0.0137806	0.0548102	0.0696193	-0.0605961	-0.171486	0.0157043	0.143253	-0.288251	-0.0547218	0.116917	0.127545	0.0087756	0.0516866	0.0402102	-0.0399432	-0.123153	0.0827669	0.832419	-0.239918	-0.00638883	0.0306444	0.0328333	0.0340037	0.050832	0.0114974	-0.048837	-0.0772327	0.276607	0.973122	-0.193997	0.0395316	0.00589638	0.00722006
	lh_S_orbital_med_olfact	1995	717	1270	429	-0.0369446	-0.00574463	0.00895038	-0.0913516	-0.131774	0.063411	0.878032	-0.248539	-0.01501	0.0400626	0.0421711	-0.0671237	-0.00278983	0.0265772	-0.0388896	-0.129928	0.0672076	0.192022	-0.246692	-0.0131632	0.0378685	0.0568027	-0.0427067	-0.056867	-0.00427923	-0.00259435	0.0158806	0.822984	0.982036	-0.100884	0.132645	0.000359081	0.00134655	-0.0266041	-0.0375377	0.013651	-0.0221854	-0.0248958	0.725809	0.973122	-0.14166	0.0918685	0.000565859	0.00147615
	rh_S_orbital_med_olfact	1995	717	1270	429	-0.0286848	-0.00416384	0.0122874	-0.00828923	-0.0451063	0.525161	0.9433	-0.161871	0.0716581	0.00148489	0.00278417	-0.0361337	-0.0202056	0.0195352	-0.00758262	-0.0430616	0.544112	0.763538	-0.159826	0.0737028	0.00135144	0.0042677	-0.026026	-0.0459884	0.00871908	0.0222348	0.0335082	0.636907	0.982036	-0.0832562	0.150273	0.000861525	0.00187236	0.00244588	0.034043	0.0721615	0.0462729	-0.0575915	0.4172	0.973122	-0.174356	0.0591729	0.00259522	0.00353894
	lh_G_orbital	1995	717	1270	429	-0.0650417	-0.0143985	-0.0282893	-0.0450287	-0.0674966	0.341695	0.936592	-0.184261	0.0492678	0.00396027	0.00579868	-0.0608382	0.0533218	0.04011	0.00273772	-0.15168	0.0326221	0.154176	-0.268444	-0.0349153	0.0708411	0.0850093	-0.0441722	0.0034556	0.00488217	0.00359462	-0.0489442	0.490525	0.982036	-0.165709	0.0678202	0.0017683	0.00321509	-0.0085528	-0.00543733	0.0131723	0.000956304	-0.0153324	0.828998	0.973122	-0.132097	0.101432	0.000349116	0.00140704
	rh_G_orbital	1995	717	1270	429	-0.0550661	-0.0250529	-0.00926373	-0.046676	-0.0675096	0.341602	0.936592	-0.184274	0.0492548	0.00396243	0.00579868	-0.030185	0.0427898	0.0192715	-0.0507687	-0.143096	0.0438217	0.171894	-0.259861	-0.0263321	0.0558648	0.0728671	-0.0260928	0.0437134	0.0117852	-0.0616273	-0.143331	0.0434768	0.832419	-0.260096	-0.0265669	0.0562383	0.0581776	0.00306967	0.025494	-0.00210901	-0.0141547	-0.0344765	0.627203	0.973122	-0.151241	0.0822879	0.000902443	0.00184226
	lh_G_rectus	1995	717	1270	429	-0.0735346	0.0172342	0.00652307	-0.0883689	-0.186027	0.00877888	0.526733	-0.302791	-0.0692622	0.162137	0.162137	-0.0431174	0.0114703	0.0162598	-0.0464002	-0.11731	0.0984252	0.228041	-0.234074	-0.000545385	0.025367	0.0422784	-0.0450699	-0.0167108	-0.00235604	-0.00700484	-0.033037	0.641652	0.982036	-0.149801	0.0837274	0.000842237	0.00187236	0.00523645	-0.00139503	0.0112107	-0.0310033	-0.0355929	0.616093	0.973122	-0.152357	0.0811715	0.000951834	0.00184226
	rh_G_rectus	1995	717	1270	429	-0.050514	-0.0297011	-0.0399187	0.020573	0.0396686	0.576291	0.9433	-0.0770957	0.156433	0.00115396	0.00238751	-0.0519064	-0.0315657	-0.0340967	-0.0119515	0.00178096	0.979985	0.993062	-0.114983	0.118545	0.000171029	0.00227015	-0.0219155	-0.0386577	0.00228531	0.0526929	0.0672144	0.343717	0.948767	-0.0495499	0.183979	0.00391385	0.00587077	-0.00268235	-0.00736333	0.0388041	0.0346636	0.000535026	0.993986	0.993986	-0.116229	0.117299	0.000159892	0.00140704
	lh_S_circular_insula_ant	1995	717	1270	429	-0.0272342	0.0208484	0.0431992	0.0391879	-0.0521105	0.462901	0.9433	-0.168875	0.0646538	0.00203825	0.00359691	-0.0391926	0.0395041	0.0248036	0.0607673	-0.0427039	0.547462	0.763538	-0.159468	0.0740605	0.00132925	0.0042677	-0.0428119	0.038776	0.0127282	0.000716117	-0.0936463	0.187105	0.948767	-0.210411	0.0231181	0.0110959	0.0133151	-0.0490535	0.01906	-0.00963435	0.0457253	-0.0127634	0.857312	0.973122	-0.129528	0.104001	0.000305749	0.00140704
	rh_S_circular_insula_ant	1995	717	1270	429	-0.0183471	0.0197645	0.00106482	0.00672646	-0.0324544	0.647539	0.9433	-0.149219	0.0843099	0.000818941	0.00225929	0.00713057	0.0384151	0.0851726	-0.0359842	-0.152683	0.0314895	0.154176	-0.269447	-0.0359182	0.0727754	0.0856181	0.012578	0.0364572	0.0370798	-0.0450194	-0.106041	0.135228	0.832419	-0.222806	0.010723	0.0173235	0.0199887	0.0127872	0.0643147	0.0306489	-0.0230246	-0.105303	0.137969	0.973122	-0.222067	0.0114615	0.0168827	0.0177712
	lh_S_circular_insula_inf	1995	717	1270	429	-0.0220981	-0.0684979	-0.0343233	-0.0363166	0.0445079	0.530672	0.9433	-0.0722565	0.161272	0.00144464	0.00278417	-0.0134516	0.00223153	0.0179596	0.0428428	0.00922361	0.89662	0.969814	-0.107541	0.125988	0.000254166	0.00227015	-0.00329596	-0.0440713	0.0477295	0.0305312	0.0235788	0.739773	0.982036	-0.0931856	0.140343	0.000529985	0.00158995	0.0119063	-0.000560697	0.0489687	-0.00604073	-0.0425811	0.548614	0.973122	-0.159345	0.0741833	0.00132171	0.00208692
	rh_S_circular_insula_inf	1995	717	1270	429	-0.0362811	-0.0471857	-0.00204786	0.00910214	0.022074	0.755834	0.977298	-0.0946903	0.138838	0.000491578	0.00196631	-0.0265478	-0.0104376	0.0199246	-0.0154461	-0.0514905	0.468241	0.68523	-0.168255	0.0652738	0.00198262	0.00594785	-0.0044904	-0.0591859	0.0144984	-0.0364389	0.00381032	0.957193	0.982036	-0.112954	0.120575	0.000190734	0.00117797	-0.0396347	-0.0349003	-0.00501369	-0.0206789	-0.0204091	0.773728	0.973122	-0.137173	0.0963553	0.000452095	0.00142767
	lh_G_cuneus	1995	717	1270	429	-0.00185493	-0.0128516	-0.00581081	-0.00683365	0.00997448	0.888257	0.977298	-0.10679	0.126739	0.000264378	0.00164077	-0.00741752	0.00635274	0.0698669	0.0569886	-0.026701	0.706817	0.883521	-0.143465	0.0900634	0.000618682	0.00285546	-0.0214799	0.0123833	0.0234881	0.0302206	-0.0271297	0.702331	0.982036	-0.143894	0.0896346	0.000631882	0.00180538	0.0366026	-0.00197282	0.0504635	0.0434129	0.0315256	0.656971	0.973122	-0.0852388	0.14829	0.000783018	0.00174004
	rh_G_cuneus	1995	717	1270	429	0.0105248	-0.0135648	-0.0135579	-0.0120423	0.0256066	0.718309	0.971837	-0.0911577	0.142371	0.00058614	0.00202246	0.0152523	0.0303399	0.053738	0.00304266	-0.065843	0.353653	0.589422	-0.182607	0.0509214	0.00369507	0.00886817	0.00776359	0.00539993	0.0327634	0.0355213	0.00512487	0.942448	0.982036	-0.111639	0.121889	0.00020461	0.00117797	0.0175567	-0.00272995	0.0435532	0.0739868	0.0508299	0.473968	0.973122	-0.0659345	0.167594	0.00192486	0.00281686
	lh_Lat_Fis_post	1995	717	1270	429	0.00478288	-0.0608624	-0.0287772	-0.0318201	0.0626749	0.377291	0.9433	-0.0540894	0.179439	0.00323108	0.0051017	-0.0142495	0.00763362	0.0565497	0.0384279	-0.0400476	0.572653	0.763538	-0.156812	0.0767168	0.00117463	0.00418325	-0.00421645	-0.0105593	0.0355833	0.0370211	0.00778289	0.912697	0.982036	-0.108981	0.124547	0.000235595	0.00117797	-0.00545047	-0.0114543	0.0271549	0.0730863	0.0520595	0.463339	0.973122	-0.0647048	0.168824	0.00203362	0.00290517
	rh_Lat_Fis_post	1995	717	1270	429	-0.0399791	-0.0614714	-0.0225769	-0.00547357	0.0386557	0.586069	0.9433	-0.0781086	0.15542	0.00110036	0.0023579	-0.0382141	-0.0473595	0.0408794	0.00733931	-0.0244006	0.731049	0.888919	-0.141165	0.0923637	0.000552115	0.00276057	-0.0257056	-0.0860407	0.0705372	0.0735897	0.063611	0.370207	0.965759	-0.0531534	0.180375	0.00336239	0.00530904	-0.0261567	-0.0514817	0.0407281	0.103548	0.0885347	0.21233	0.973122	-0.0282297	0.205299	0.00916026	0.0102652
